# Supplementary material
Source: publisher figshare collection journal article supplement (https://acs.figshare.com/ndownloader/files/3814672)

## ***Supporting Information***

### ***Rh(III)-Catalyzed Decarboxylative ortho-Heteroarylation of Aromatic Carboxylic Acids by Using the Carboxylic Acid as a Traceless Directing Group***

***Xurong Qin,<sup>†,‡</sup> Denan Sun,<sup>†</sup> Qiulin You,<sup>†</sup> Yangyang Cheng,<sup>†</sup> Jingbo Lan<sup>\*†</sup> and Jingsong You<sup>\*†</sup>***

*<sup>†</sup>Key Laboratory of Green Chemistry and Technology of Ministry of Education, College of Chemistry, and State Key Laboratory of Biotherapy, West China Medical School, Sichuan University, 29 Wangjiang Road, Chengdu 610064, China.*

*Fax: (+86) 28-85412203; E-mail: jingbolan@scu.edu.cn; jsyou@scu.edu.cn*

*<sup>‡</sup>College of Pharmaceutical Science, Southwest University, 2 Tiansheng Road, Chongqing 400716, China.*

## Table of contents

|                                                                                                                        |     |
|------------------------------------------------------------------------------------------------------------------------|-----|
| <b>I.</b> General Remarks.....                                                                                         | S3  |
| <b>II.</b> Optimization of the Decarboxylative <i>ortho</i> -Heteroarylation of Aromatic Carboxylic Acids.....         | S3  |
| <b>III.</b> General Procedure for the Decarboxylative <i>ortho</i> -Heteroarylation of Aromatic Carboxylic Acids ..... | S6  |
| <b>IV.</b> The H/D Exchange Experiments for Each Coupling Partner ( <b>1c</b> and <b>2a</b> ).....                     | S7  |
| <b>V.</b> Kinetic Isotope Experiments.....                                                                             | S9  |
| <b>VI.</b> Competition Experiments.....                                                                                | S10 |
| <b>VII.</b> Decarboxylation of 2-(Benzothiophen-2-yl)-6-methoxybenzoic Acid.....                                       | S11 |
| <b>VIII.</b> Experimental Data for the Described Substances.....                                                       | S12 |
| <b>IX.</b> References.....                                                                                             | S26 |
| <b>X.</b> Copies of $^1\text{H}$ , $^{13}\text{C}$ and $^1\text{H}$ - $^1\text{H}$ NOESY NMR Spectra.....              | S27 |

## I. General Remarks

NMR spectra were obtained on a Bruker AV II-400 MHz spectrometer. The  $^1\text{H}$  NMR (400 MHz) chemical shifts were measured relative to  $\text{CDCl}_3$ , TMS or  $\text{DMSO}-d_6$  as the internal reference ( $\text{CDCl}_3$ :  $\delta = 7.26$  ppm; TMS:  $\delta = 0.00$  ppm;  $\text{DMSO}-d_6$ :  $\delta = 2.50$  ppm). The  $^{13}\text{C}$  NMR (100 MHz) chemical shifts were given using  $\text{CDCl}_3$  or  $\text{DMSO}-d_6$  as the internal standard ( $\text{CDCl}_3$ :  $\delta = 77.16$  ppm;  $\text{DMSO}-d_6$ :  $\delta = 39.52$  ppm). High-resolution mass spectra (HRMS) were obtained with a Waters-Q-TOF-Premier (ESI). Melting points were determined with XRC-1 and are uncorrected.

Unless otherwise noted, all reagents were obtained from commercial suppliers and used without further purification.  $\text{RhCl}_3 \cdot 3\text{H}_2\text{O}$  were purchased from Shaanxi Kaida Chemical Engineering (China) CO., Ltd.  $\text{AgSbF}_6$  was purchased from Alfa Aesar.  $\text{Ag}_2\text{CO}_3$  was purchased from Tianjin Yin Li Da Chemical Engineering (China) CO., Ltd.  $\text{Cu}(\text{OAc})_2 \cdot \text{H}_2\text{O}$  was purchased from Shanghai Kefeng Chemical Reagent (China) CO., Ltd.  $[\text{Cp}^*\text{RhCl}_2]_2$ ,<sup>1</sup> and indole derivatives,<sup>2</sup> indolizine derivatives,<sup>3</sup> were prepared according to the literature procedures. All solvents were purified and dried according to standard methods prior to use.

## II. Optimization of the Decarboxylative *ortho*-Heteroarylation of Aromatic Carboxylic Acids

A flame-dried Schlenk test tube with a magnetic stirring bar was charged with the catalyst (2.5-5.0 mol %), oxidant (2.0 equiv), base (2.0 equiv), 2-methoxybenzoic acid (**1a**, 0.25 mmol), benzothiophene (**2a**, 3.0 equiv), and solvent (1.0 mL). The reaction mixture was stirred for 10 min at room temperature under a  $\text{N}_2$  atmosphere, and then heated at 130-150  $^\circ\text{C}$  in a pre-heated oil bath for the indicated time. The reaction mixture was then cooled to ambient temperature, diluted with 20 mL of  $\text{CH}_2\text{Cl}_2$ , filtered through a celite pad, and washed with 10-20 mL of  $\text{CH}_2\text{Cl}_2$ . The combined organic extracts were concentrated, and the resulting residue was purified by column chromatography on silica gel (petroleum/ethyl acetate = 50/1 v/v) to provide the desired product **3a**.

**(1) Table S1. Optimization of the Reaction Conditions by Screening Catalyst<sup>a,b</sup>**

COc1ccccc1C(=O)O (1a) + c1ccc2c(c1)sc3ccccc32 (2a)  $\xrightarrow[\text{Solvent, 140 } ^\circ\text{C, 24 h}]{\text{Cat., Oxidant, Base}}$  COc1ccccc1C(=O)O-c1ccc2c(c1)sc3ccccc32 (3a)

| Entry          | Catalyst                             | Oxidant                         | Base                            | Solvent        | Yield (%) |
|----------------|--------------------------------------|---------------------------------|---------------------------------|----------------|-----------|
| 1              | Pd(OAc) <sub>2</sub>                 | Ag <sub>2</sub> CO <sub>3</sub> | KOAc                            | 1,4-dioxane    | n.d.      |
| 2              | Pd(OAc) <sub>2</sub>                 | Ag <sub>2</sub> CO <sub>3</sub> | NaOAc                           | 1,4-dioxane    | n.d.      |
| 3              | Pd(OAc) <sub>2</sub>                 | Ag <sub>2</sub> CO <sub>3</sub> | K <sub>2</sub> HPO <sub>4</sub> | 1,4-dioxane    | n.d.      |
| 4              | Pd(OAc) <sub>2</sub>                 | Ag <sub>2</sub> CO <sub>3</sub> | K <sub>2</sub> HPO <sub>4</sub> | <i>t</i> -BuOH | n.d.      |
| 5              | Pd(OAc) <sub>2</sub>                 | Ag <sub>2</sub> CO <sub>3</sub> | K <sub>2</sub> HPO <sub>4</sub> | DMF            | n.d.      |
| 6              | Pd(OAc) <sub>2</sub>                 | Ag <sub>2</sub> CO <sub>3</sub> | -                               | diglyme        | n.d.      |
| 7              | Pd(OAc) <sub>2</sub>                 | Cu(OAc) <sub>2</sub>            | -                               | DMF            | n.d.      |
| 8 <sup>c</sup> | [Cp*RhCl <sub>2</sub> ] <sub>2</sub> | Ag <sub>2</sub> CO <sub>3</sub> | -                               | DMF            | 35        |

<sup>a</sup>Reactions were carried out using Pd(OAc)<sub>2</sub> (5.0 mol %), oxidant (2.0 equiv), base (2.0 equiv), 2-methoxybenzoic acid (0.25 mmol), benzothiophene (3.0 equiv), and solvent (1.0 mL) at 140 °C for 24 h under a N<sub>2</sub> atmosphere. <sup>b</sup>Yield of isolated product. <sup>c</sup>[Cp\*RhCl<sub>2</sub>]<sub>2</sub> (2.5 mol %), AgSbF<sub>6</sub> (10 mol %), 4 Å MS (100 mg). DMF = dimethyl formamide.

**(2) Table S2. Screening Base<sup>a,b</sup>**

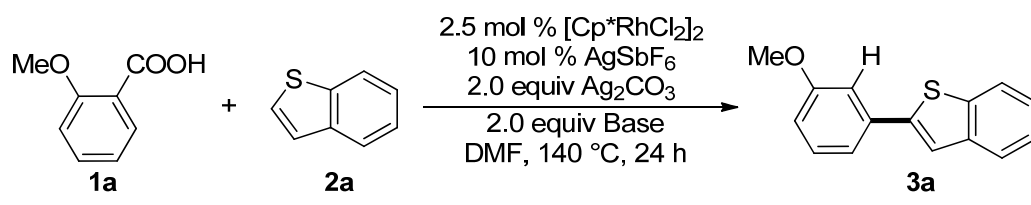

| Entry | Base                            | Yield (%) |
|-------|---------------------------------|-----------|
| 1     | LiCl                            | 27        |
| 2     | LiOAc                           | 28        |
| 3     | NaOAc                           | 24        |
| 4     | KOAc                            | 38        |
| 5     | Bu <sub>4</sub> NOAc            | 35        |
| 6     | Bu <sub>4</sub> NBr             | trace     |
| 7     | Cs <sub>2</sub> CO <sub>3</sub> | n.d.      |
| 8     | K <sub>2</sub> CO <sub>3</sub>  | trace     |
| 9     | KHCO <sub>3</sub>               | 34        |
| 10    | KH <sub>2</sub> PO <sub>4</sub> | 50        |
| 11    | K <sub>3</sub> PO <sub>4</sub>  | 38        |
| 12    | KF                              | trace     |
| 13    | KHF <sub>2</sub>                | 14        |
| 14    | K <sub>2</sub> HPO <sub>4</sub> | 54        |

<sup>a</sup>Reactions were carried out using [Cp\*RhCl<sub>2</sub>]<sub>2</sub> (2.5 mol %), AgSbF<sub>6</sub> (10 mol %), Ag<sub>2</sub>CO<sub>3</sub> (2.0 equiv), base (2.0 equiv), 2-methoxybenzoic acid (0.25 mmol), benzothiophene (3.0 equiv), 4 Å MS (100 mg), and DMF (1.0 mL) at 140 °C for 24 h under a N<sub>2</sub> atmosphere. <sup>b</sup>Yield of isolated product. DMF = dimethyl formamide.

(3) **Table S3. Screening Oxidant**<sup>a,b</sup>

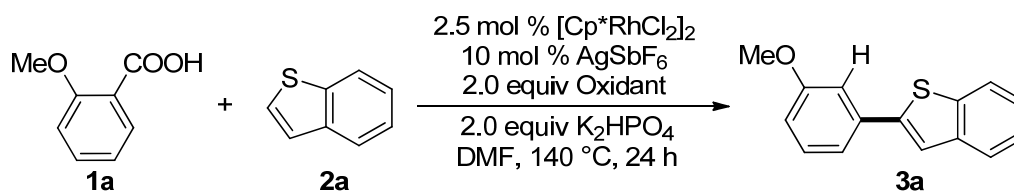

| Entry | Oxidant                                      | Yield (%) |
|-------|----------------------------------------------|-----------|
| 1     | Ag <sub>2</sub> CO <sub>3</sub>              | 54        |
| 2     | Ag <sub>2</sub> O                            | 27        |
| 3     | AgOAc                                        | 41        |
| 4     | Cu(OAc) <sub>2</sub>                         | 34        |
| 5     | CuCl <sub>2</sub>                            | trace     |
| 6     | K <sub>2</sub> S <sub>2</sub> O <sub>8</sub> | n.d.      |
| 7     | BQ                                           | n.d.      |
| 8     | -                                            | trace     |

<sup>a</sup>Reactions were carried out using [Cp\*RhCl<sub>2</sub>]<sub>2</sub> (2.5 mol %), AgSbF<sub>6</sub> (10 mol %), oxidant (2.0 equiv), K<sub>2</sub>HPO<sub>4</sub> (2.0 equiv), 2-methoxybenzoic acid (0.25 mmol), benzothiophene (3.0 equiv), 4 Å MS (100 mg), and DMF (1.0 mL) at 140 °C for 24 h under a N<sub>2</sub> atmosphere. <sup>b</sup>Yield of isolated product. DMF = dimethyl formamide.

(4) **Table S4. Screening Solvent**<sup>a,b</sup>

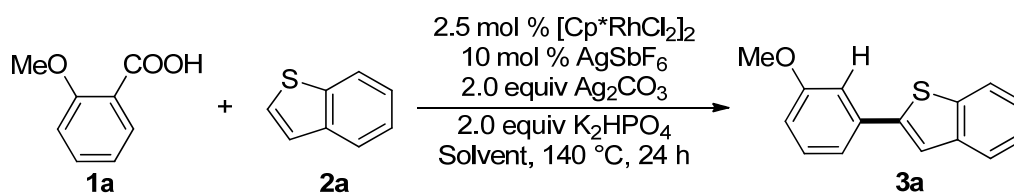

| Entry | Solvent           | Yield (%) |
|-------|-------------------|-----------|
| 1     | DCE               | n.d.      |
| 2     | 1,4-dioxane       | 35        |
| 3     | diglyme           | 14        |
| 4     | <i>t</i> -AmylOH  | trace     |
| 5     | <i>t</i> -BuOH    | trace     |
| 6     | DMA               | 52        |
| 7     | DMSO              | n.d.      |
| 8     | PhCF <sub>3</sub> | 33        |

|    |                       |       |
|----|-----------------------|-------|
| 9  | PhCl                  | 40    |
| 10 | xylene                | n.d.  |
| 11 | AcOH                  | trace |
| 12 | NMP                   | 65    |
| 13 | NMP/PhCl (v/v = 4/1)  | 45    |
| 14 | DMF/DMSO (v/v = 20/1) | 33    |

<sup>a</sup>Reactions were carried out using [Cp\*RhCl<sub>2</sub>]<sub>2</sub> (2.5 mol %), AgSbF<sub>6</sub> (10 mol %), Ag<sub>2</sub>CO<sub>3</sub> (2.0 equiv), K<sub>2</sub>HPO<sub>4</sub> (2.0 equiv), 2-methoxybenzoic acid (0.25 mmol), benzothiophene (3.0 equiv), 4 Å MS (100 mg), and solvent (1.0 mL) at 140 °C for 24 h under a N<sub>2</sub> atmosphere. <sup>b</sup>Yield of isolated product. DCE = 1,2-dichloroethane, DMF = dimethyl formamide, DMA = dimethyl acetamide, DMSO = dimethyl sulfoxide, NMP = 1-methylpyrrolidin-2-one.

(5) **Table S5. Screening Temperature, the Amount of Ag<sub>2</sub>CO<sub>3</sub>, and without AgSbF<sub>6</sub><sup>a,b</sup>**

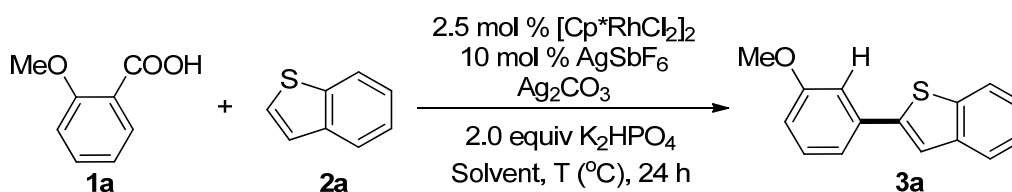

| Entry          | Solvent | T (°C) | Yield (%) |
|----------------|---------|--------|-----------|
| 1              | DMF     | 130    | 41        |
| 2              | DMF     | 150    | 70        |
| 3              | NMP     | 150    | 75        |
| 4 <sup>c</sup> | NMP     | 150    | 83        |
| 5 <sup>d</sup> | NMP     | 150    | 65        |

<sup>a</sup>Reactions were carried out using [Cp\*RhCl<sub>2</sub>]<sub>2</sub> (2.5 mol %), AgSbF<sub>6</sub> (10 mol %), Ag<sub>2</sub>CO<sub>3</sub> (2.0 equiv), K<sub>2</sub>HPO<sub>4</sub> (2.0 equiv), 2-methoxybenzoic acid (0.25 mmol), benzothiophene (3.0 equiv), 4 Å MS (100 mg), and solvent (1.0 mL) under a N<sub>2</sub> atmosphere. <sup>b</sup>Yield of isolated product. <sup>c</sup>Ag<sub>2</sub>CO<sub>3</sub> (3.0 equiv). DMF = dimethyl formamide. NMP = 1-methylpyrrolidin-2-one. <sup>d</sup>Without AgSbF<sub>6</sub>.

### III. General Procedure for the Decarboxylative *ortho*-Heteroarylation of Aromatic Carboxylic Acids

A flame-dried Schlenk test tube with a magnetic stirring bar was charged with [Cp\*RhCl<sub>2</sub>]<sub>2</sub> (2.5 mol %), AgSbF<sub>6</sub> (10 mol %), Ag<sub>2</sub>CO<sub>3</sub> (0.75 mmol, 3.0 equiv), K<sub>2</sub>HPO<sub>4</sub> (0.5 mmol, 2.0 equiv), benzoic acid (0.25 mmol), heteroarene (0.75 mmol, 3.0 equiv), 4 Å MS (100 mg), and NMP (1.0 mL) under a N<sub>2</sub> atmosphere. The reaction mixture was stirred for 10 min at room temperature under an N<sub>2</sub> atmosphere, and then

heated at 150~160 °C in a pre-heated oil bath. The reaction mixture was then cooled to ambient temperature, diluted with 20 mL of CH<sub>2</sub>Cl<sub>2</sub>, filtered through a celite pad, and washed with 10-20 mL of CH<sub>2</sub>Cl<sub>2</sub>. The combined organic extracts were concentrated and the resulting residue was purified by column chromatography on silica gel to provide the desired product.

#### IV. The H/D Exchange Experiments for Each Coupling Partner (1c and 2a)

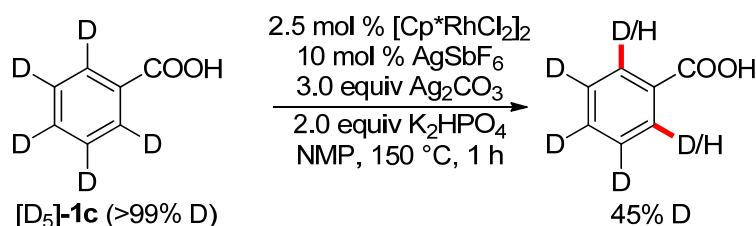

A flame-dried Schlenk test tube with a magnetic stirring bar was charged with [Cp\*RhCl<sub>2</sub>]<sub>2</sub> (3.9 mg, 6.25 μmol, 2.5 mol %), AgSbF<sub>6</sub> (8.6 mg, 25.0 μmol, 10 mol %), 2,3,4,5,6-pentadeuteriobenzoic acid<sup>4</sup> (0.25 mmol), Ag<sub>2</sub>CO<sub>3</sub> (0.75 mmol, 3.0 equiv), K<sub>2</sub>HPO<sub>4</sub> (0.50 mmol, 2.0 equiv), and 4 Å MS (100 mg) in NMP (1.0 mL). The reaction mixture was stirred for 10 min at room temperature under a N<sub>2</sub> atmosphere, and then heated at 150 °C in a pre-heated oil bath for 1 h. After the mixture was cooled, iodomethane (1.5 mmol, 6.0 equiv), and K<sub>2</sub>CO<sub>3</sub> (0.75 mmol, 3.0 equiv) were added, and the resulting mixture was stirred under air at room temperature for 3 h. The reaction mixture was diluted with 20 mL of EtOAc, filtered through a celite pad, washed with sat. NH<sub>4</sub>Cl solution, and dried over anhydrous Na<sub>2</sub>SO<sub>4</sub>. The combined organic extracts were concentrated and the resulting residue was purified by column chromatography on silica gel to provide the desired product. The deuterated ratio was calculated from <sup>1</sup>H NMR analysis.

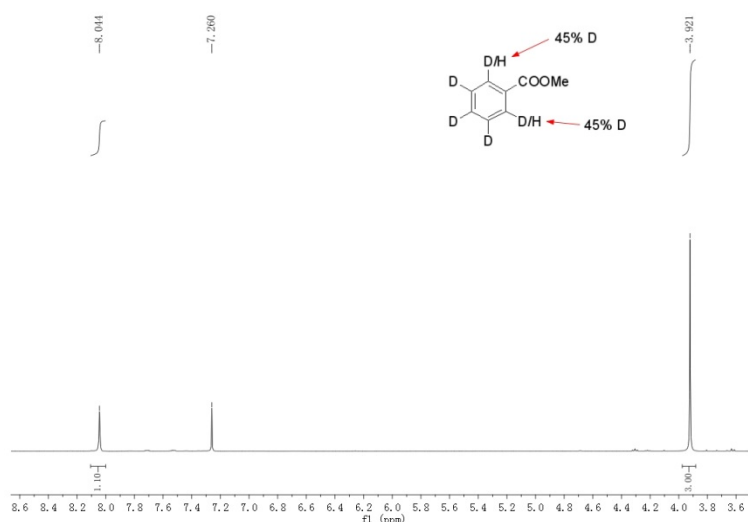

**Figure. S1.** Copy of  $^1\text{H}$  NMR Spectra of H/D Exchange Experiment of 2,3,4,5,6-Pentadeuteriobenzoic Acid.

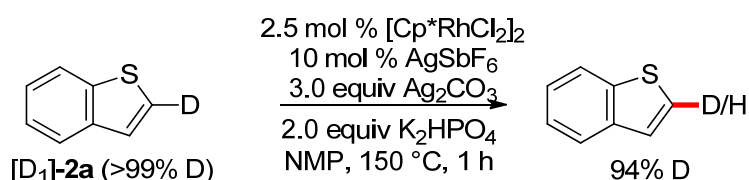

A flame-dried Schlenk test tube with a magnetic stirring bar was charged with  $[\text{Cp}^*\text{RhCl}_2]_2$  (3.9 mg, 6.25  $\mu\text{mol}$ , 2.5 mol %),  $\text{AgSbF}_6$  (8.6 mg, 25.0  $\mu\text{mol}$ , 10 mol %), 2-deuterio-benzothiophene<sup>5</sup> (0.25 mmol),  $\text{Ag}_2\text{CO}_3$  (0.75 mmol, 3.0 equiv),  $\text{K}_2\text{HPO}_4$  (0.50 mmol, 2.0 equiv), and 4 Å MS (100 mg) in NMP (1.0 mL). The reaction mixture was stirred for 10 min at room temperature under a  $\text{N}_2$  atmosphere, and then heated at 150  $^\circ\text{C}$  in a pre-heated oil bath for 1 h. After the mixture was cooled to room temperature, diluted with 20 mL of EtOAc, filtered through a celite pad, washed with sat.  $\text{NH}_4\text{Cl}$  solution, and dried over anhydrous  $\text{Na}_2\text{SO}_4$ . The combined organic extracts were concentrated and the resulting residue was purified by column chromatography on silica gel to provide the desired product. The deuterated ratio was calculated from  $^1\text{H}$  NMR analysis.



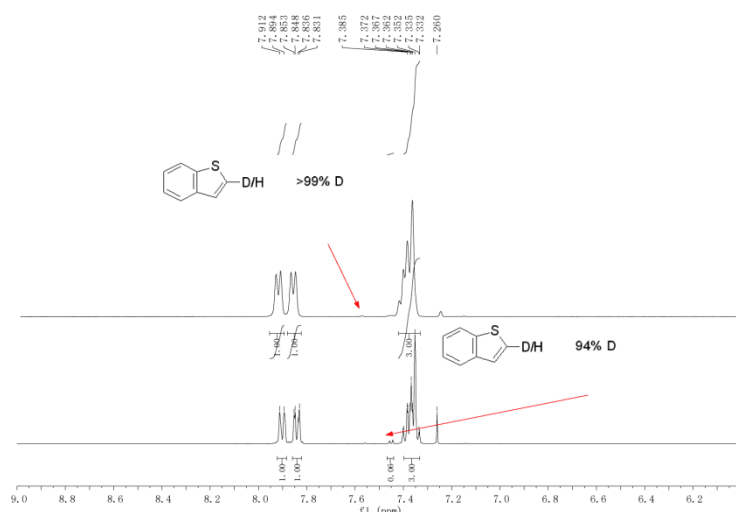

**Figure. S2** Copy of  $^1\text{H}$  NMR Spectra of H/D Exchange Experiment of 2-Deuterio-benzothiophene.

## V. Kinetic Isotope Experiments

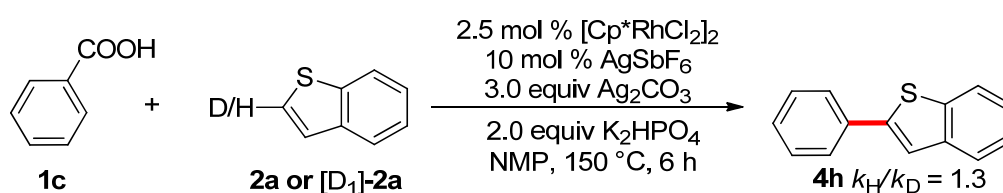

Two sets of reactions were carried out in a parallel manner. In each case benzoic acid was allowed to react with benzothiophene and 2-deuterio-benzothiophene, respectively. The sealed tubes were screw capped and heated to 150  $^\circ\text{C}$  (oil bath). After being stirred for 6 h, the reaction mixture was cooled to room temperature, diluted with 20 mL of EtOAc, filtered through a celite pad, washed with sat.  $\text{NH}_4\text{Cl}$  solution, and dried over anhydrous  $\text{Na}_2\text{SO}_4$ . The yield of **4h** was determined by  $^1\text{H}$  NMR of the crude product using 1,3,5-trimethoxybenzene as internal standard.

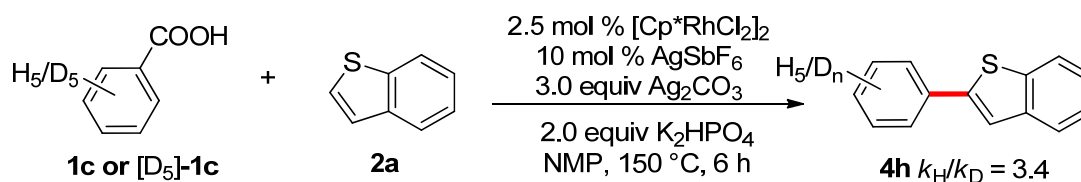

Two sets of reactions were carried out in a parallel manner. In each case benzothiophene was allowed to react with 2,3,4,5,6-pentadeuteriobenzoic acid and benzoic acid, respectively. The sealed tubes were screw capped and heated to 150  $^\circ\text{C}$

(oil bath). After being stirred for 6 h, the reaction mixture was cooled to room temperature, diluted with 20 mL of EtOAc, filtered through a celite pad, washed with sat. NH<sub>4</sub>Cl solution, and dried over anhydrous Na<sub>2</sub>SO<sub>4</sub>. The yield of **4h** was determined by <sup>1</sup>H NMR of the crude product using 1,3,5-trimethoxybenzene as internal standard.

## VI. Competition Experiments

**Table S6. Intermolecular Competition Experiments of Benzoic Acids**

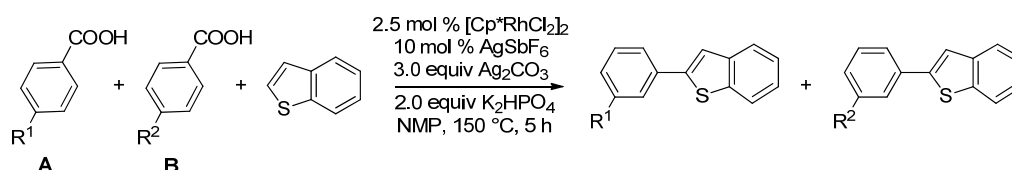

| Entry | R <sup>1</sup> | R <sup>2</sup> | Ratio of products      |
|-------|----------------|----------------|------------------------|
| 1     | CN             | OMe            | <b>4b/3a</b> = 1 : 2.5 |
| 2     | CN             | Br             | <b>4b/4a</b> = 1 : 1.3 |
| 3     | Br             | OMe            | <b>4a/3a</b> = 1 : 1.8 |

A flame-dried Schlenk test tube with a magnetic stirring bar was charged with [Cp<sup>\*</sup>RhCl<sub>2</sub>]<sub>2</sub> (3.9 mg, 6.25 μmol, 2.5 mol %), AgSbF<sub>6</sub> (8.6 mg, 25.0 μmol, 10 mol %), benzoic acid **A** (0.125 mmol), benzoic acid **B** (0.125 mmol), benzothiophene (0.75 mmol, 3.0 equiv), Ag<sub>2</sub>CO<sub>3</sub> (207 mg, 0.75 mmol), K<sub>2</sub>HPO<sub>4</sub> (87 mg, 0.50 mmol), 4 Å MS (100 mg), and NMP (1.0 mL). The reaction mixture was stirred for 10 min at room temperature under a N<sub>2</sub> atmosphere, and then heated at 150 °C in a pre-heated oil bath for 5 h. The reaction mixture was cooled to room temperature, diluted with 20 mL of EtOAc, filtered through a celite pad, washed with sat. NH<sub>4</sub>Cl solution, and dried over anhydrous Na<sub>2</sub>SO<sub>4</sub>. The solvent was then removed under reduced pressure. The ratio was determined by <sup>1</sup>H NMR of the crude product.

## VII. Decarboxylation of 2-(Benzothiophen-2-yl)-6-methoxybenzoic Acid

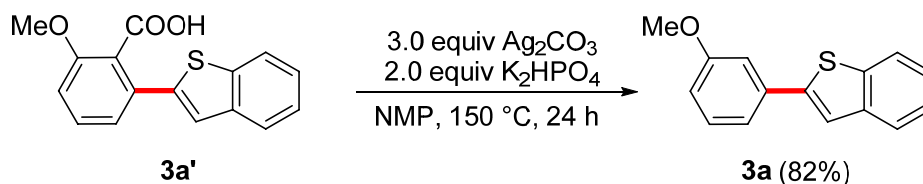

A flame-dried Schlenk test tube with a magnetic stirring bar was charged with  $\text{Ag}_2\text{CO}_3$  (0.75 mmol, 3.0 equiv),  $\text{K}_2\text{HPO}_4$  (0.5 mmol, 2.0 equiv), 2-(benzothiophen-2-yl)-6-methoxybenzoic acid (0.25 mmol), 4 Å MS (100 mg), and NMP (1.0 mL) under a  $\text{N}_2$  atmosphere. The reaction mixture was stirred for 10 min at room temperature under a  $\text{N}_2$  atmosphere, and then heated at 150 °C in a pre-heated oil bath. The reaction mixture was then cooled to ambient temperature, diluted with 20 mL of  $\text{CH}_2\text{Cl}_2$ , filtered through a celite pad, and washed with 10-20 mL of  $\text{CH}_2\text{Cl}_2$ . The combined organic extracts were concentrated and the resulting residue was purified by column chromatography on silica gel to provide the desired product.

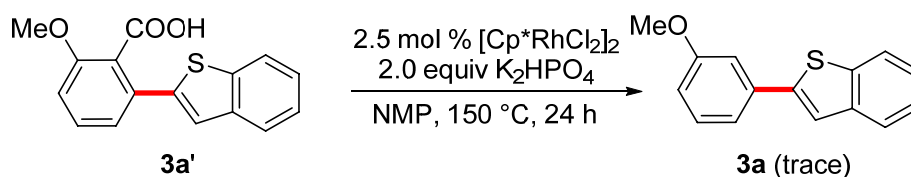

A flame-dried Schlenk test tube with a magnetic stirring bar was charged with  $[\text{Cp}^*\text{RhCl}_2]_2$  (6.25  $\mu\text{mol}$ , 2.5 mol %),  $\text{K}_2\text{HPO}_4$  (0.5 mmol, 2.0 equiv), 2-(benzothiophen-2-yl)-6-methoxybenzoic acid (0.25 mmol), 4 Å MS (100 mg), and NMP (1.0 mL) under a  $\text{N}_2$  atmosphere. The reaction mixture was stirred for 10 min at room temperature under a  $\text{N}_2$  atmosphere, and then heated at 150 °C in a pre-heated oil bath. The reaction mixture was then cooled to ambient temperature, diluted with 20 mL of  $\text{CH}_2\text{Cl}_2$ , filtered through a celite pad, and washed with 10-20 mL of  $\text{CH}_2\text{Cl}_2$ . The combined organic extracts were concentrated and the resulting residue was purified by column chromatography on silica gel to provide the desired product.

## VIII. Experimental Data for the Described Substances

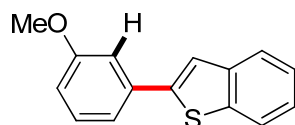

### 2-(3-Methoxyphenyl)benzothiophene (3a)<sup>6</sup>

Purification via silica gel column chromatography (petroleum ether/EtOAc = 50/1 v/v) afforded the desired product as a yellow solid (49.5 mg, 83%). M.p.: 94-96 °C. <sup>1</sup>H NMR (400 MHz, CDCl<sub>3</sub>):  $\delta$  = 3.80 (s, 3H), 6.81 (d,  $J$  = 7.6 Hz, 1H), 7.17 (s, 1H), 7.21-7.29 (m, 4H), 7.46 (s, 1H), 7.68 (d,  $J$  = 7.6 Hz, 1H), 7.74 (d,  $J$  = 7.6 Hz, 1H) ppm. <sup>13</sup>C NMR (100 MHz, CDCl<sub>3</sub>):  $\delta$  = 55.5, 112.3, 113.9, 119.2, 119.8, 122.4, 123.7, 124.5, 124.7, 130.1, 135.8, 139.6, 140.7, 144.2, 160.1 ppm. HRMS (ESI<sup>+</sup>): calcd for C<sub>15</sub>H<sub>13</sub>OS [M+H]<sup>+</sup> 241.0687, found 241.0681.

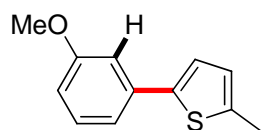

### 2-(3-Methoxyphenyl)-5-methylthiophene (3b)

Purification via silica gel column chromatography (petroleum ether/EtOAc = 100/1 v/v) afforded the desired product as yellow oil (29.5 mg, 58%). <sup>1</sup>H NMR (400 MHz, CDCl<sub>3</sub>):  $\delta$  = 2.50 (s, 3H), 3.84 (s, 3H), 6.72-6.73 (m, 1H), 6.78 (dd,  $J$  = 8.0 Hz, 2.0 Hz, 1H), 7.08-7.09 (m, 1H), 7.10 (d,  $J$  = 3.6 Hz, 1H), 7.14 (d,  $J$  = 7.6 Hz, 1H), 7.25 (t,  $J$  = 8.0 Hz, 1H) ppm. <sup>13</sup>C NMR (100 MHz, CDCl<sub>3</sub>):  $\delta$  = 15.6, 55.4, 111.3, 112.6, 118.3, 123.3, 126.3, 129.9, 136.2, 139.8, 141.9, 160.0 ppm. HRMS (ESI<sup>+</sup>): calcd for C<sub>12</sub>H<sub>13</sub>OS [M+H]<sup>+</sup> 205.0687, found 205.0682.

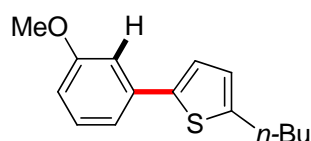

### 2-Butyl-5-(3-methoxyphenyl)thiophene (3c)

Purification via silica gel column chromatography (petroleum ether/EtOAc = 50/1 v/v)

afforded the desired product as yellow oil (42.0 mg, 68%).  $^1\text{H}$  NMR (400 MHz,  $\text{CDCl}_3$ ):  $\delta$  = 0.93 (t,  $J$  = 7.4 Hz, 3H), 1.37-1.47 (m, 2H), 1.65-1.72 (m, 2H), 2.80 (t,  $J$  = 7.6 Hz, 2H), 3.84 (s, 3H), 6.73 (d,  $J$  = 3.6 Hz, 1H), 6.78 (dd,  $J$  = 8.0 Hz, 1.6 Hz, 1H), 7.09 (s, 1H), 7.11 (d,  $J$  = 3.6 Hz, 1H), 7.15 (d,  $J$  = 7.6 Hz, 1H), 7.24-7.28 (m, 1H) ppm.  $^{13}\text{C}$  NMR (100 MHz,  $\text{CDCl}_3$ ):  $\delta$  = 14.0, 22.3, 30.1, 33.9, 55.4, 111.2, 112.6, 118.3, 123.0, 125.1, 129.9, 136.2, 141.6, 145.9, 160.0 ppm. HRMS ( $\text{ESI}^+$ ): calcd for  $\text{C}_{15}\text{H}_{19}\text{OS}$   $[\text{M}+\text{H}]^+$  247.1157, found 247.1162.

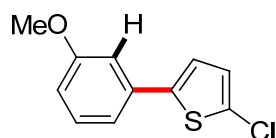

### 2-Chloro-5-(3-methoxyphenyl)thiophene (3d)

Purification via silica gel column chromatography (petroleum ether/EtOAc = 100/1 v/v) afforded the desired product as yellow oil (37.3 mg, 67%).  $^1\text{H}$  NMR (400 MHz,  $\text{CDCl}_3$ ):  $\delta$  = 3.88 (s, 3H), 6.87 (dd,  $J$  = 8.4 Hz, 1.6 Hz, 1H), 6.92 (d,  $J$  = 4.0 Hz, 1H), 7.07 (s, 1H), 7.10 (d,  $J$  = 3.6 Hz, 1H), 7.13 (d,  $J$  = 7.6 Hz, 1H), 7.31 (t,  $J$  = 8.0 Hz, 1H) ppm.  $^{13}\text{C}$  NMR (100 MHz,  $\text{CDCl}_3$ ):  $\delta$  = 55.5, 111.4, 113.4, 118.3, 122.6, 127.2, 129.3, 130.2, 135.1, 142.9, 160.1 ppm. HRMS ( $\text{ESI}^+$ ): calcd for  $\text{C}_{11}\text{H}_{10}\text{ClOS}$   $[\text{M}+\text{H}]^+$  225.0141, found 225.0140.

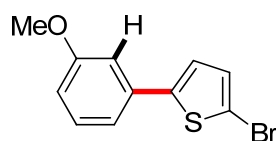

### 2-Bromo-5-(3-methoxyphenyl)thiophene (3e)

Purification via silica gel column chromatography (petroleum ether/EtOAc = 100/1 v/v) afforded the desired product as a yellow oil (38.5 mg, 57%).  $^1\text{H}$  NMR (400 MHz,  $\text{CDCl}_3$ ):  $\delta$  = 3.87 (s, 3H), 6.86 (dd,  $J$  = 8.0 Hz, 2.0 Hz, 1H), 7.04-7.07 (m, 3H), 7.12-7.14 (m, 1H), 7.29 (t,  $J$  = 8.0 Hz, 1H) ppm.  $^{13}\text{C}$  NMR (100 MHz,  $\text{CDCl}_3$ ):  $\delta$  = 55.5, 111.5, 111.6, 113.4, 118.3, 123.6, 130.2, 130.9, 135.1, 145.8, 160.1 ppm. HRMS ( $\text{ESI}^+$ ): calcd for  $\text{C}_{11}\text{H}_{10}\text{BrOS}$   $[\text{M}+\text{H}]^+$  268.9636, found 268.9636.

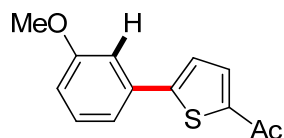

### 1-(5-(3-Methoxyphenyl)thiophen-2-yl)ethanone (3f)

Purification via silica gel column chromatography (petroleum ether/EtOAc = 30/1 v/v) afforded the desired product as a yellow solid (37.0 mg, 64%). M.p.: 76-78 °C.  $^1\text{H}$  NMR (400 MHz,  $\text{CDCl}_3$ ):  $\delta$  = 2.57 (s, 3H), 3.86 (s, 3H), 6.91 (dd,  $J$  = 8.4 Hz, 1.6 Hz, 1H), 7.17 (s, 1H), 7.23-7.26 (m, 1H), 7.31-7.35 (m, 2H), 7.65 (d,  $J$  = 4.0 Hz, 1H) ppm.  $^{13}\text{C}$  NMR (100 MHz,  $\text{CDCl}_3$ ):  $\delta$  = 26.7, 55.5, 112.0, 114.7, 118.9, 124.2, 130.3, 133.5, 134.7, 143.3, 152.7, 160.2, 190.8 ppm. HRMS ( $\text{ESI}^+$ ): calcd for  $\text{C}_{13}\text{H}_{12}\text{NaO}_2\text{S}$   $[\text{M}+\text{Na}]^+$  255.0456, found 255.0450.

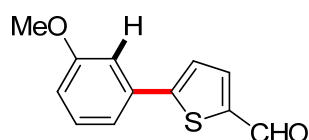

### 5-(3-Methoxyphenyl)thiophene-2-carbaldehyde (3g)

Purification via silica gel column chromatography (petroleum ether/EtOAc = 30/1 v/v) afforded the desired product as yellow oil (30.0 mg, 55%).  $^1\text{H}$  NMR (400 MHz,  $\text{CDCl}_3$ ):  $\delta$  = 3.79 (s, 3H), 6.86 (dd,  $J$  = 8.0 Hz, 2.8 Hz, 1H), 7.11 (t,  $J$  = 2.0 Hz, 1H), 7.18-7.20 (m, 1H), 7.25 (t,  $J$  = 8.0 Hz, 1H), 7.32 (d,  $J$  = 4.0 Hz, 1H), 7.66 (d,  $J$  = 4.0 Hz, 1H), 9.82 (s, 1H) ppm.  $^{13}\text{C}$  NMR (100 MHz,  $\text{CDCl}_3$ ):  $\delta$  = 55.6, 112.2, 115.1, 119.1, 124.4, 130.4, 134.5, 137.4, 142.7, 154.3, 160.3, 182.9 ppm. HRMS ( $\text{ESI}^+$ ): calcd for  $\text{C}_{12}\text{H}_{10}\text{NaO}_2\text{S}$   $[\text{M}+\text{Na}]^+$  241.0299, found 241.0302.

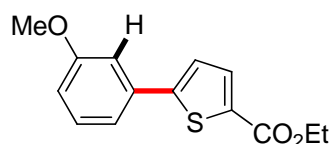

### Ethyl 5-(3-methoxyphenyl)thiophene-2-carboxylate (3h)

Purification via silica gel column chromatography (petroleum ether/EtOAc = 30/1 v/v) afforded the desired product as yellow oil (49.3 mg, 75%).  $^1\text{H}$  NMR (400 MHz,

CDCl<sub>3</sub>):  $\delta$  = 1.37 (t,  $J$  = 7.2 Hz, 3H), 3.86 (s, 3H), 4.34 (q,  $J$  = 7.2 Hz, 2H), 6.89 (dd,  $J$  = 8.0 Hz, 2.0 Hz, 1H), 7.16 (s, 1H), 7.22 (d,  $J$  = 7.6 Hz, 1H), 7.27 (d,  $J$  = 3.6 Hz, 1H), 7.30 (t,  $J$  = 8.0 Hz, 1H), 7.75 (d,  $J$  = 4.0 Hz, 1H) ppm. <sup>13</sup>C NMR (100 MHz, CDCl<sub>3</sub>):  $\delta$  = 14.5, 55.5, 61.3, 111.9, 114.4, 118.9, 123.9, 130.3, 132.7, 134.3, 134.9, 151.0, 160.2, 162.4 ppm. HRMS (ESI<sup>+</sup>): calcd for C<sub>14</sub>H<sub>14</sub>NaO<sub>3</sub>S [M+Na]<sup>+</sup> 285.0561, found 285.0561.

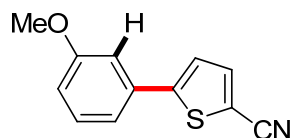

### 5-(3-Methoxyphenyl)thiophene-2-carbonitrile (3i)

Purification via silica gel column chromatography (petroleum ether/EtOAc = 30/1 v/v) afforded the desired product as a yellow solid (44.1 mg, 82%). M.p.: 55-57 °C. <sup>1</sup>H NMR (400 MHz, CDCl<sub>3</sub>):  $\delta$  = 3.86 (s, 3H), 6.93 (dd,  $J$  = 8.0 Hz, 2.0 Hz, 1H), 7.11 (s, 1H), 7.17 (dd,  $J$  = 7.6 Hz, 0.4 Hz, 1H), 7.26-7.27 (m, 1H), 7.33 (t,  $J$  = 8.0 Hz, 1H), 7.58 (d,  $J$  = 4.0 Hz, 1H) ppm. <sup>13</sup>C NMR (100 MHz, CDCl<sub>3</sub>):  $\delta$  = 55.5, 108.4, 112.3, 114.5, 114.9, 119.1, 123.6, 130.5, 133.6, 138.4, 151.8, 160.3 ppm. HRMS (ESI<sup>+</sup>): calcd for C<sub>12</sub>H<sub>9</sub>NNaOS [M+Na]<sup>+</sup> 238.0303, found 238.0302.

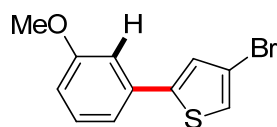

### 4-Bromo-2-(3-methoxyphenyl)thiophene (3j)

Purification via silica gel column chromatography (petroleum ether/EtOAc = 100/1 v/v) afforded the desired product as yellow oil (43.8 mg, 65%). <sup>1</sup>H NMR (400 MHz, CDCl<sub>3</sub>):  $\delta$  = 3.84 (s, 3H), 6.85 (dd,  $J$  = 8.0 Hz, 1.6 Hz, 1H), 7.07 (s, 1H), 7.13-7.17 (m, 2H), 7.20 (s, 1H), 7.28 (t,  $J$  = 7.8 Hz, 1H) ppm. <sup>13</sup>C NMR (100 MHz, CDCl<sub>3</sub>):  $\delta$  = 55.5, 110.6, 111.5, 113.9, 118.4, 122.1, 126.0, 130.2, 134.6, 145.4, 160.1 ppm. HRMS (ESI<sup>+</sup>): calcd for C<sub>11</sub>H<sub>10</sub>BrOS [M+H]<sup>+</sup> 268.9636, found 268.9636.

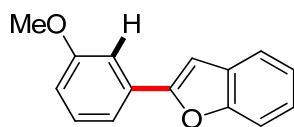

### 2-(3-Methoxyphenyl)benzofuran (3k)

Purification via silica gel column chromatography (petroleum ether/EtOAc = 50/1 v/v) afforded the desired product as yellow oil (31.3 mg, 56%).  $^1\text{H}$  NMR (400 MHz,  $\text{CDCl}_3$ ):  $\delta$  = 3.89 (s, 3H), 6.89 (dd,  $J$  = 8.4 Hz, 1.6 Hz, 1H), 7.02 (s, 1H), 7.21 (t,  $J$  = 7.4 Hz, 1H), 7.26-7.30 (m, 1H), 7.33 (t,  $J$  = 7.8 Hz, 1H), 7.41 (s, 1H), 7.44 (d,  $J$  = 8.0 Hz, 1H), 7.51 (d,  $J$  = 8.0 Hz, 1H), 7.57 (d,  $J$  = 7.2 Hz, 1H) ppm.  $^{13}\text{C}$  NMR (100 MHz,  $\text{CDCl}_3$ ):  $\delta$  = 55.5, 101.8, 110.3, 111.3, 114.6, 117.7, 121.1, 123.1, 124.5, 129.3, 130.0, 131.9, 155.0, 155.9, 160.1 ppm. HRMS ( $\text{ESI}^+$ ): calcd for  $\text{C}_{15}\text{H}_{13}\text{O}_2$   $[\text{M}+\text{H}]^+$  225.0916, found 225.0916.

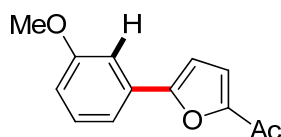

### 1-(5-(3-Methoxyphenyl)furan-2-yl)ethanone (3l)

Purification via silica gel column chromatography (petroleum ether/EtOAc = 50/1 v/v) afforded the desired product as yellow oil (30.8 mg, 57%).  $^1\text{H}$  NMR (400 MHz,  $\text{CDCl}_3$ ):  $\delta$  = 2.52 (s, 3H), 3.87 (s, 3H), 6.76 (d,  $J$  = 3.6 Hz, 1H), 6.91 (d,  $J$  = 7.6 Hz, 1H), 7.25-7.26 (m, 1H), 7.32 (s, 1H), 7.34-7.39 (m, 2H) ppm.  $^{13}\text{C}$  NMR (100 MHz,  $\text{CDCl}_3$ ):  $\delta$  = 26.1, 55.6, 107.9, 110.5, 115.1, 117.7, 119.5, 130.2, 130.8, 152.1, 157.6, 160.2, 186.6 ppm. HRMS ( $\text{ESI}^+$ ): calcd for  $\text{C}_{13}\text{H}_{12}\text{NaO}_3$   $[\text{M}+\text{Na}]^+$  239.0684, found 239.0685.

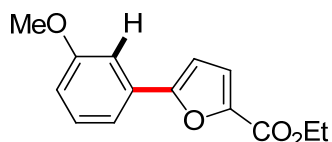

### Ethyl 5-(3-methoxyphenyl)furan-2-carboxylate (3m)

Purification via silica gel column chromatography (petroleum ether/EtOAc = 25/1 v/v) afforded the desired product as yellow oil (46.1 mg, 75%).  $^1\text{H}$  NMR (400 MHz,



CDCl<sub>3</sub>):  $\delta$  = 1.38 (t,  $J$  = 7.0 Hz, 3H), 3.87 (s, 3H), 4.36 (q,  $J$  = 7.0 Hz, 2H), 6.72 (d,  $J$  = 3.6 Hz, 1H), 6.88 (dd,  $J$  = 8.0 Hz, 1.6 Hz, 1H), 7.22 (d,  $J$  = 3.6 Hz, 1H), 7.30-7.32 (m, 2H), 7.34 (t,  $J$  = 7.2 Hz, 1H) ppm. <sup>13</sup>C NMR (100 MHz, CDCl<sub>3</sub>):  $\delta$  = 14.5, 55.6, 61.0, 107.3, 110.2, 115.0, 117.6, 119.9, 130.0, 131.0, 144.1, 157.5, 159.0, 160.1 ppm. HRMS (ESI<sup>+</sup>): calcd for C<sub>14</sub>H<sub>14</sub>NaO<sub>4</sub> [M+Na]<sup>+</sup> 269.0790, found 269.0792.

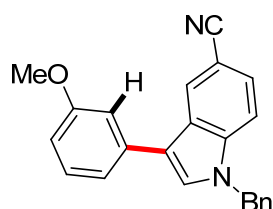

### 1-Benzyl-3-(3-methoxyphenyl)-1H-indole-5-carbonitrile (3n)

Following the general procedure, [Cp\*RhCl<sub>2</sub>]<sub>2</sub> (7.8 mg, 5.0 mol %) and AgSbF<sub>6</sub> (17.2 mg, 20 mol %) was added, and the reaction mixture was heated at 160 °C for 48 h. Purification via silica gel column chromatography (petroleum ether/EtOAc = 15/1 v/v) afforded the desired product as a yellow solid (38.0 mg, 45%). M.p.: 54-56 °C. <sup>1</sup>H NMR (400 MHz, CDCl<sub>3</sub>):  $\delta$  = 3.88 (s, 3H), 5.38 (s, 2H), 6.87 (dd,  $J$  = 8.4 Hz, 2.0 Hz, 1H), 7.12 (s, 1H), 7.13-7.20 (m, 3H), 7.31-7.41 (m, 6H), 7.44 (dd,  $J$  = 8.8 Hz, 1.2 Hz, 1H), 8.28 (s, 1H) ppm. <sup>13</sup>C NMR (100 MHz, CDCl<sub>3</sub>):  $\delta$  = 50.6, 55.5, 103.5, 111.1, 112.2, 113.5, 118.6, 120.2, 120.8, 125.3, 126.0, 126.5, 127.0, 128.1, 128.4, 129.2, 130.2, 135.4, 136.2, 138.6, 160.3 ppm. HRMS (ESI<sup>+</sup>): calcd for C<sub>23</sub>H<sub>19</sub>N<sub>2</sub>O [M+H]<sup>+</sup> 339.1497, found 339.1494.

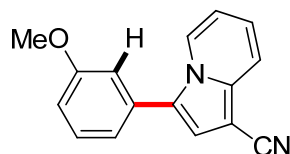

### 3-(3-Methoxyphenyl)indolizine-1-carbonitrile (3o)

Following the general procedure, [Cp\*RhCl<sub>2</sub>]<sub>2</sub> (7.8 mg, 5.0 mol %) and AgSbF<sub>6</sub> (17.2 mg, 20 mol %) was added, and the reaction mixture was heated at 160 °C for 48 h. Purification via silica gel column chromatography (petroleum ether/EtOAc = 10/1 v/v) afforded the desired product as yellow oil (32.2 mg, 52%). <sup>1</sup>H NMR (400 MHz,

CDCl<sub>3</sub>):  $\delta$  = 3.87 (s, 3H), 6.73 (t,  $J$  = 6.8 Hz, 1H), 6.98 (d,  $J$  = 8.0 Hz, 1H), 7.04-7.06 (m, 2H), 7.10-7.12 (m, 2H), 7.41 (t,  $J$  = 8.0 Hz, 1H), 7.69 (d,  $J$  = 8.8 Hz, 1H), 8.31 (d,  $J$  = 7.2 Hz, 1H) ppm. <sup>13</sup>C NMR (100 MHz, CDCl<sub>3</sub>):  $\delta$  = 55.6, 82.4, 113.3, 114.1, 114.6, 116.5, 117.1, 118.4, 121.0, 122.5, 124.1, 127.0, 130.5, 131.6, 138.6, 160.3 ppm. HRMS (ESI<sup>+</sup>): calcd for C<sub>16</sub>H<sub>12</sub>N<sub>2</sub>NaO [M+Na]<sup>+</sup> 271.0847, found 271.0846.

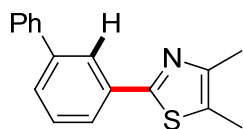

### 2-([1,1'-Biphenyl]-3-yl)-4,5-dimethylthiazole (3p)

Following the general procedure, [Cp\*RhCl<sub>2</sub>]<sub>2</sub> (7.8 mg, 5.0 mol %) and AgSbF<sub>6</sub> (17.2 mg, 20 mol %) was added, and the reaction mixture was heated at 160 °C for 48 h. Purification via silica gel column chromatography (petroleum ether/EtOAc = 20/1 v/v) afforded the desired product as yellow oil (35.1 mg, 53%). <sup>1</sup>H NMR (400 MHz, CDCl<sub>3</sub>):  $\delta$  = 2.40 (s, 3H), 2.41 (s, 3H), 7.35-7.39 (m, 1H), 7.44-7.49 (m, 3H), 7.59 (d,  $J$  = 8.0 Hz, 1H), 7.63-7.66 (m, 2H), 7.83 (d,  $J$  = 7.6 Hz, 1H), 8.09 (s, 1H) ppm. <sup>13</sup>C NMR (100 MHz, CDCl<sub>3</sub>):  $\delta$  = 11.7, 15.0, 125.0, 125.2, 126.8, 127.4, 127.7, 128.3, 128.9, 129.4, 134.6, 140.8, 142.1, 149.6, 163.4 ppm. HRMS (ESI<sup>+</sup>): calcd for C<sub>17</sub>H<sub>16</sub>NS [M+H]<sup>+</sup> 266.1003, found 266.0999.

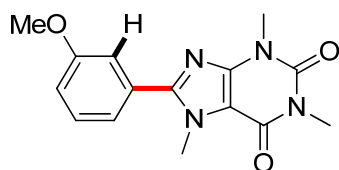

### 8-(3-Methoxyphenyl)-1,3,7-trimethyl-1H-purine-2,6(3H,7H)-dione (3q)

Following the general procedure, [Cp\*RhCl<sub>2</sub>]<sub>2</sub> (7.8 mg, 5.0 mol %) and AgSbF<sub>6</sub> (17.2 mg, 20 mol %) was added, and the reaction mixture was heated at 160 °C for 48 h. Purification via silica gel column chromatography (petroleum ether/EtOAc = 3/1 v/v) afforded the desired product as a yellow solid (41.9 mg, 56%). M.p.: 136-138 °C. <sup>1</sup>H NMR (400 MHz, CDCl<sub>3</sub>):  $\delta$  = 3.44 (s, 3H), 3.63 (s, 3H), 3.88 (s, 3H), 4.06 (s, 3H), 7.05 (d,  $J$  = 8.0 Hz, 1H), 7.22-7.27 (m, 2H), 7.42 (t,  $J$  = 7.6 Hz, 1H) ppm. <sup>13</sup>C NMR

(100 MHz, CDCl<sub>3</sub>):  $\delta$  = 28.1, 29.9, 34.0, 55.6, 108.7, 115.0, 116.3, 121.5, 129.7, 130.1, 148.4, 151.9, 152.1, 155.7, 160.0 ppm. HRMS (ESI<sup>+</sup>): calcd for C<sub>15</sub>H<sub>16</sub>N<sub>4</sub>NaO<sub>3</sub> [M+Na]<sup>+</sup> 323.1120, found 323.1117.

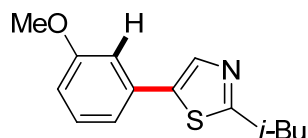

### 2-*iso*-Butyl-5-(3-methoxyphenyl)thiazole (3r)

Following the general procedure, [Cp\*RhCl<sub>2</sub>]<sub>2</sub> (7.8 mg, 5.0 mol %) and AgSbF<sub>6</sub> (17.2 mg, 20 mol %) was added, and the reaction mixture was heated at 160 °C for 48 h. Purification via silica gel column chromatography (petroleum ether/EtOAc = 20/1 v/v) afforded the desired product as yellow oil (35.2 mg, 57%). <sup>1</sup>H NMR (400 MHz, CDCl<sub>3</sub>):  $\delta$  = 1.04 (d, *J* = 6.8 Hz, 6H), 2.13-2.20 (m, 1H), 2.89 (d, *J* = 6.8 Hz, 2H), 3.87 (s, 3H), 6.87 (d, *J* = 8.4 Hz, 1H), 7.08 (s, 1H), 7.14 (d, *J* = 7.6 Hz, 1H), 7.30 (t, *J* = 8.0 Hz, 1H), 7.84 (s, 1H) ppm. <sup>13</sup>C NMR (100 MHz, CDCl<sub>3</sub>):  $\delta$  = 22.4, 30.0, 42.7, 55.5, 112.4, 113.6, 119.3, 130.2, 133.1, 137.9, 138.5, 160.1, 169.9 ppm. HRMS (ESI<sup>+</sup>): calcd for C<sub>14</sub>H<sub>18</sub>NOS [M+H]<sup>+</sup> 248.1109, found 248.1108.

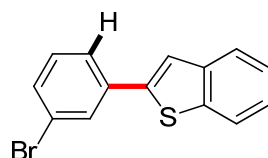

### 2-(3-Bromophenyl)benzothiophene (4a)

Following the general procedure, [Cp\*RhCl<sub>2</sub>]<sub>2</sub> (7.8 mg, 5.0 mol %) and AgSbF<sub>6</sub> (17.2 mg, 20 mol %) was added, and the reaction mixture was heated at 150 °C for 48 h. Purification via silica gel column chromatography (petroleum ether/EtOAc = 50/1 v/v) afforded the desired product as a white solid (45.5 mg, 63%). M.p.: 86-88 °C <sup>1</sup>H NMR (400 MHz, CDCl<sub>3</sub>):  $\delta$  = 7.27-7.39 (m, 3H), 7.46 (d, *J* = 8.0 Hz, 1H), 7.55 (s, 1H), 7.62 (d, *J* = 7.6 Hz, 1H), 7.77 (d, *J* = 7.2 Hz, 1H), 7.83 (d, *J* = 7.6 Hz, 1H), 7.87 (s, 1H) ppm. <sup>13</sup>C NMR (100 MHz, CDCl<sub>3</sub>):  $\delta$  = 120.6, 122.5, 123.2, 124.0, 124.85, 124.89, 125.3, 129.1, 129.5, 130.6, 131.2, 136.5, 140.6, 142.5 ppm. HRMS (ESI<sup>+</sup>):

calcd for C<sub>14</sub>H<sub>10</sub>BrS [M+H]<sup>+</sup> 288.9687, found 288.9684.

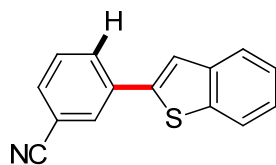

### 3-(Benzothiophen-2-yl)benzonitrile (4b)

Following the general procedure, [Cp\*RhCl<sub>2</sub>]<sub>2</sub> (7.8 mg, 5.0 mol %) and AgSbF<sub>6</sub> (17.2 mg, 20 mol %) was added, and the reaction mixture was heated at 150 °C for 48 h. Purification via silica gel column chromatography (petroleum ether/EtOAc = 30/1 v/v) afforded the desired product as a yellow solid (32.1 mg, 55%). M.p.: 150-152 °C. <sup>1</sup>H NMR (400 MHz, CDCl<sub>3</sub>): δ = 7.35-7.42 (m, 2H), 7.52 (t, *J* = 7.8 Hz, 1H), 7.61-7.63 (m, 2H), 7.81 (dd, *J* = 6.4 Hz, 2.4 Hz, 1H), 7.85 (d, *J* = 8.4 Hz, 1H), 7.91 (d, *J* = 8.0 Hz, 1H), 7.99 (s, 1H) ppm. <sup>13</sup>C NMR (100 MHz, CDCl<sub>3</sub>): δ = 113.4, 118.6, 121.2, 122.5, 124.2, 125.1, 125.3, 129.9, 123.0, 130.7, 131.5, 135.8, 139.8, 140.5, 141.4 ppm. HRMS (ESI<sup>+</sup>): calcd for C<sub>15</sub>H<sub>9</sub>NNaS [M+Na]<sup>+</sup> 258.0353, found 258.0353.

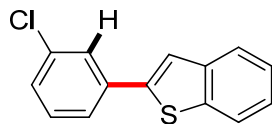

### 2-(3-Chlorophenyl)benzothiophene (4c)

Following the general procedure, [Cp\*RhCl<sub>2</sub>]<sub>2</sub> (7.8 mg, 5.0 mol %) and AgSbF<sub>6</sub> (17.2 mg, 20 mol %) was added, and the reaction mixture was heated at 150 °C for 48 h. Purification via silica gel column chromatography (petroleum ether/EtOAc = 50/1 v/v) afforded the desired product as a white solid (37.1 mg, 61%). M.p.: 116-118 °C. <sup>1</sup>H NMR (400 MHz, CDCl<sub>3</sub>): δ = 7.22-7.32 (m, 4H), 7.48 (s, 1H), 7.50 (td, *J* = 7.2 Hz, 1.6 Hz, 1H), 7.63-7.64 (m, 1H), 7.70 (d, *J* = 7.2 Hz, 1H), 7.75 (d, *J* = 7.6 Hz, 1H) ppm. <sup>13</sup>C NMR (100 MHz, CDCl<sub>3</sub>): δ = 120.5, 122.5, 123.9, 124.78, 124.85, 124.88, 126.6, 128.3, 130.3, 135.1, 136.3, 139.8, 140.6, 142.6 ppm. HRMS (ESI<sup>+</sup>): calcd for C<sub>14</sub>H<sub>10</sub>ClS [M+H]<sup>+</sup> 245.0192, found 245.0195.

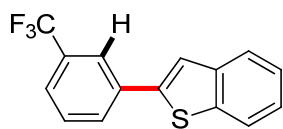

#### 2-(3-(Trifluoromethyl)phenyl)benzothiophene (4d)

Following the general procedure,  $[\text{Cp}^*\text{RhCl}_2]_2$  (7.8 mg, 5.0 mol %) and  $\text{AgSbF}_6$  (17.2 mg, 20 mol %) was added, and the reaction mixture was heated at 150 °C for 48 h. Purification via silica gel column chromatography (petroleum ether/EtOAc = 100/1 v/v) afforded the desired product as a white solid (47.5 mg, 68%). M.p.: 102-104 °C.  $^1\text{H}$  NMR (400 MHz,  $\text{CDCl}_3$ ):  $\delta$  = 7.25-7.32 (m, 2H), 7.44-7.52 (m, 2H), 7.53 (s, 1H), 7.71 (d,  $J$  = 8.4 Hz, 1H), 7.76 (t,  $J$  = 7.6 Hz, 2H), 7.87 (s, 1H) ppm.  $^{13}\text{C}$  NMR (100 MHz,  $\text{CDCl}_3$ ):  $\delta$  = 120.8, 122.5, 122.8, 123.2, 123.3, 124.0, 124.86, 124.89, 124.94, 125.0, 125.5, 129.6, 129.8, 131.4, 131.8, 135.3, 139.8, 140.6, 142.5 ppm. HRMS (ESI $^+$ ): calcd for  $\text{C}_{15}\text{H}_{10}\text{F}_3\text{S}$   $[\text{M}+\text{H}]^+$  279.0455, found 279.0451.

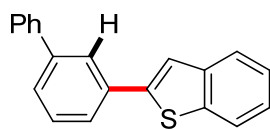

#### 2-([1,1'-Biphenyl]-3-yl)benzothiophene (4e)

Following the general procedure,  $[\text{Cp}^*\text{RhCl}_2]_2$  (7.8 mg, 5.0 mol %) and  $\text{AgSbF}_6$  (17.2 mg, 20 mol %) was added, and the reaction mixture was heated at 150 °C for 48 h. Purification via silica gel column chromatography (petroleum ether/EtOAc = 100/1 v/v) afforded the desired product as a white solid (37.5 mg, 52%). M.p.: 116-118 °C.  $^1\text{H}$  NMR (400 MHz,  $\text{CDCl}_3$ ):  $\delta$  = 7.30-7.41 (m, 3H), 7.46-7.51 (m, 3H), 7.55 (d,  $J$  = 7.6 Hz, 1H), 7.61 (s, 1H), 7.64 (d,  $J$  = 7.2 Hz, 2H), 7.69 (d,  $J$  = 7.6 Hz, 1H), 7.78 (d,  $J$  = 7.2 Hz, 1H), 7.83 (d,  $J$  = 7.6 Hz, 1H), 7.92 (s, 1H) ppm.  $^{13}\text{C}$  NMR (100 MHz,  $\text{CDCl}_3$ ):  $\delta$  = 119.9, 122.4, 123.8, 124.6, 124.7, 125.6, 127.3, 127.4, 127.8, 129.0, 129.5, 135.0, 139.7, 140.8, 140.9, 142.2, 144.3 ppm. HRMS (ESI $^+$ ): calcd for  $\text{C}_{20}\text{H}_{15}\text{S}$   $[\text{M}+\text{H}]^+$  287.0894, found 287.0895.

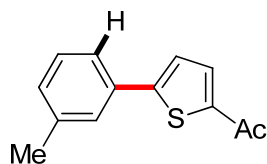

### 1-(5-(*m*-Tolyl)thiophen-2-yl)ethanone (4f)

Following the general procedure, [Cp\*RhCl<sub>2</sub>]<sub>2</sub> (7.8 mg, 5.0 mol %) and AgSbF<sub>6</sub> (17.2 mg, 20 mol %) was added, and the reaction mixture was heated at 150 °C for 48 h. Purification via silica gel column chromatography (petroleum ether/EtOAc = 30/1 v/v) afforded the desired product as a yellow solid (29.6 mg, 55%). M.p.: 90-92 °C. <sup>1</sup>H NMR (400 MHz, CDCl<sub>3</sub>): δ = 2.40 (s, 3H), 2.57 (s, 3H), 7.18 (d, *J* = 7.6 Hz, 1H), 7.29-7.33 (m, 2H), 7.45-7.47 (m, 2H), 7.65 (d, *J* = 4.0 Hz, 1H) ppm. <sup>13</sup>C NMR (100 MHz, CDCl<sub>3</sub>): δ = 21.6, 26.7, 123.6, 123.9, 127.1, 129.2, 130.0, 133.4, 133.6, 139.0, 143.1, 153.2, 190.8 ppm. HRMS (ESI<sup>+</sup>): calcd for C<sub>13</sub>H<sub>12</sub>NaOS [M+Na]<sup>+</sup> 239.0507, found 239.0506.

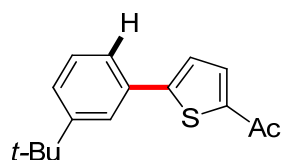

### 1-(5-(3-(*tert*-Butyl)phenyl)thiophen-2-yl)ethanone (4g)

Following the general procedure, [Cp\*RhCl<sub>2</sub>]<sub>2</sub> (7.8 mg, 5.0 mol %) and AgSbF<sub>6</sub> (17.2 mg, 20 mol %) was added, and the reaction mixture was heated at 150 °C for 48 h. Purification via silica gel column chromatography (petroleum ether/EtOAc = 30/1 v/v) afforded the desired product as a yellow solid (32.9 mg, 51%). M.p.: 100-102 °C. <sup>1</sup>H NMR (400 MHz, CDCl<sub>3</sub>): δ = 1.29 (s, 9H), 2.50 (s, 3H), 7.24-7.26 (m, 1H), 7.28 (d, *J* = 7.6 Hz, 1H), 7.33 (d, *J* = 8.0 Hz, 1H), 7.39 (d, *J* = 7.6 Hz, 1H), 7.59-7.60 (m, 2H) ppm. <sup>13</sup>C NMR (100 MHz, CDCl<sub>3</sub>): δ = 26.7, 31.4, 34.9, 123.6, 123.7, 123.9, 126.4, 129.0, 133.2, 133.6, 143.0, 152.3, 153.7, 190.8 ppm. HRMS (ESI<sup>+</sup>): calcd for C<sub>18</sub>H<sub>19</sub>NaOS [M+Na]<sup>+</sup> 281.0976, found 281.0978.

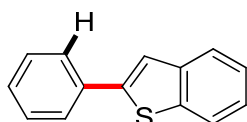

### 2-Phenylbenzothiophene (4h)

Following the general procedure, [Cp\*RhCl<sub>2</sub>]<sub>2</sub> (7.8 mg, 5.0 mol %) and AgSbF<sub>6</sub> (17.2 mg, 20 mol %) was added, and the reaction mixture was heated at 150 °C for 48 h.

Purification via silica gel column chromatography (petroleum ether/EtOAc = 50/1 v/v) afforded the desired product as a yellow solid (35.8 mg, 68%). M.p.: 166-168 °C. <sup>1</sup>H NMR (400 MHz, CDCl<sub>3</sub>): δ = 7.29-7.35 (m, 3H), 7.41 (t, *J* = 7.0 Hz, 2H), 7.55 (s, 1H), 7.71 (d, *J* = 7.2 Hz, 2H), 7.76 (d, *J* = 7.6 Hz, 1H), 7.82 (d, *J* = 7.6 Hz, 1H) ppm. <sup>13</sup>C NMR (100 MHz, CDCl<sub>3</sub>): δ = 119.6, 122.4, 123.7, 124.5, 124.7, 126.7, 128.4, 129.1, 134.5, 139.7, 140.9, 144.4 ppm. HRMS (ESI<sup>+</sup>): calcd for C<sub>14</sub>H<sub>10</sub>NaS [M+Na]<sup>+</sup> 233.0401, found 233.0404.

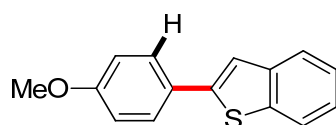

#### 2-(4-Methoxyphenyl)benzothiophene (4i)

Following the general procedure, [Cp\*RhCl<sub>2</sub>]<sub>2</sub> (7.8 mg, 5.0 mol %) and AgSbF<sub>6</sub> (17.2 mg, 20 mol %) was added, and the reaction mixture was heated at 150 °C for 48 h. Purification via silica gel column chromatography (petroleum ether/EtOAc = 50/1 v/v) afforded the desired product as a yellow solid (38.0 mg, 63%). M.p.: 112-114 °C. <sup>1</sup>H NMR (400 MHz, CDCl<sub>3</sub>): δ = 3.85 (s, 3H), 6.94 (d, *J* = 8.8 Hz, 2H), 7.25-7.35 (m, 2H), 7.42 (s, 1H), 7.63 (d, *J* = 8.8 Hz, 2H), 7.72 (d, *J* = 8.0 Hz, 1H), 7.79 (d, *J* = 8.0 Hz, 1H) ppm. <sup>13</sup>C NMR (100 MHz, CDCl<sub>3</sub>): δ = 55.5, 114.5, 118.4, 122.3, 123.4, 124.1, 124.6, 127.2, 127.9, 139.3, 141.0, 144.3, 160.0 ppm. HRMS (ESI<sup>+</sup>): calcd for C<sub>15</sub>H<sub>13</sub>OS [M+H]<sup>+</sup> 241.0687, found 241.0681.

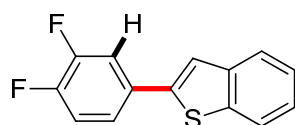

#### 2-(3,4-Difluorophenyl)benzothiophene (4j)

Following the general procedure, [Cp\*RhCl<sub>2</sub>]<sub>2</sub> (7.8 mg, 5.0 mol %) and AgSbF<sub>6</sub> (17.2 mg, 20 mol %) was added, and the reaction mixture was heated at 150 °C for 48 h. Purification via silica gel column chromatography (petroleum ether/EtOAc = 100/1 v/v) afforded the desired product as a white solid (44.2 mg, 72%). M.p.: 136-138 °C. <sup>1</sup>H NMR (400 MHz, CDCl<sub>3</sub>): δ = 7.18-7.23 (m, 1H), 7.32-7.43 (m, 3H), 7.48-7.53 (m, 2H), 7.77 (d, *J* = 7.6 Hz, 1H), 7.82 (d, *J* = 7.6 Hz, 1H) ppm. <sup>13</sup>C NMR (100 MHz,

CDCl<sub>3</sub>):  $\delta$  = 115.5, 115.7, 117.9, 118.1, 120.4, 122.4, 122.69, 122.73, 122.79, 123.9, 124.90, 124.92, 131.63, 131.67, 131.69, 131.74, 139.7, 140.6, 141.9 ppm. HRMS (ESI<sup>+</sup>): calcd for C<sub>14</sub>H<sub>8</sub>F<sub>2</sub>NaS [M+Na]<sup>+</sup> 269.0212, found 269.0213.

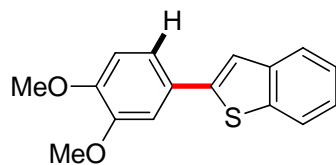

#### 2-(3,4-Dimethoxyphenyl)benzothiophene (4k)

Following the general procedure, [Cp\*RhCl<sub>2</sub>]<sub>2</sub> (7.8 mg, 5.0 mol %) and AgSbF<sub>6</sub> (17.2 mg, 20 mol %) was added, and the reaction mixture was heated at 150 °C for 48 h. Purification via silica gel column chromatography (petroleum ether/EtOAc = 30/1 v/v) afforded the desired product as a yellow solid (47.9 mg, 71%). M.p.: 132-134 °C. <sup>1</sup>H NMR (400 MHz, CDCl<sub>3</sub>):  $\delta$  = 3.93 (s, 3H), 3.98 (s, 3H), 6.91 (d, *J* = 8.0 Hz, 1H), 7.21 (d, *J* = 2.0 Hz, 1H), 7.27-7.36 (m, 3H), 7.44 (s, 1H), 7.74 (d, *J* = 7.6 Hz, 1H), 7.80 (d, *J* = 7.6 Hz, 1H) ppm. <sup>13</sup>C NMR (100 MHz, CDCl<sub>3</sub>):  $\delta$  = 56.1, 109.8, 111.6, 118.6, 119.4, 122.3, 123.4, 124.2, 124.6, 127.5, 139.3, 140.9, 144.4, 149.3, 149.5 ppm. HRMS (ESI<sup>+</sup>): calcd for C<sub>16</sub>H<sub>15</sub>O<sub>2</sub>S [M+H]<sup>+</sup> 271.0793, found 271.0793.

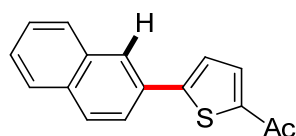

#### 1-(5-(Naphthalen-2-yl)thiophen-2-yl)ethanone (4l)

Following the general procedure, [Cp\*RhCl<sub>2</sub>]<sub>2</sub> (7.8 mg, 5.0 mol %) and AgSbF<sub>6</sub> (17.2 mg, 20 mol %) was added, and the reaction mixture was heated at 150 °C for 48 h. Purification via silica gel column chromatography (petroleum ether/EtOAc = 30/1 v/v) afforded the desired product as a yellow solid (38.8 mg, 62%). M.p.: 146-148 °C. <sup>1</sup>H NMR (400 MHz, CDCl<sub>3</sub>):  $\delta$  = 2.60 (s, 3H), 7.45 (d, *J* = 4.0 Hz, 1H), 7.49-7.55 (m, 2H), 7.70 (d, *J* = 3.6 Hz, 1H), 7.75 (dd, *J* = 7.6 Hz, 1.2 Hz, 1H), 7.83-7.90 (m, 3H), 8.14 (s, 1H) ppm. <sup>13</sup>C NMR (100 MHz, CDCl<sub>3</sub>):  $\delta$  = 26.8, 124.2, 124.3, 125.5, 127.0, 127.1, 127.9, 128.5, 129.1, 130.8, 133.6, 133.7, 143.4, 149.8, 153.0, 190.7 ppm.



HRMS (ESI<sup>+</sup>): calcd for C<sub>16</sub>H<sub>12</sub>NaOS [M+Na]<sup>+</sup> 275.0507, found 275.0508.

## IX. References

- (1) (a) Kang, J. W.; Moseley, K.; Maitlis, P. M. *J. Am. Chem. Soc.* **1969**, *91*, 5970. (b) Fujita, K.; Takahashi, Y.; Owaki, M.; Yamamoto, K.; Yamaguchi, R. *Org. Lett.* **2004**, *6*, 2785.
- (2) Choy, P. Y.; Lau, C. P.; Kwong, F. Y. *J. Org. Chem.* **2011**, *76*, 80.
- (3) Yang, Y.; Cheng, K.; Zhang, Y. *Org. Lett.* **2009**, *11*, 5606.
- (4) Ackermann, L.; Lygin, A. V.; Hofmann, N. *Angew. Chem., Int. Ed.* **2011**, *50*, 6379.
- (5) Kuhl, N.; Hopkinson, M. N.; Glorius, F. *Angew. Chem., Int. Ed.* **2012**, *51*, 8230.
- (6) Truong, T.; Daugulis, O. *J. Am. Chem. Soc.* **2011**, *133*, 4243.

# X. Copies of $^1\text{H}$ , $^{13}\text{C}$ and $^1\text{H}$ - $^1\text{H}$ NOESY NMR Spectra

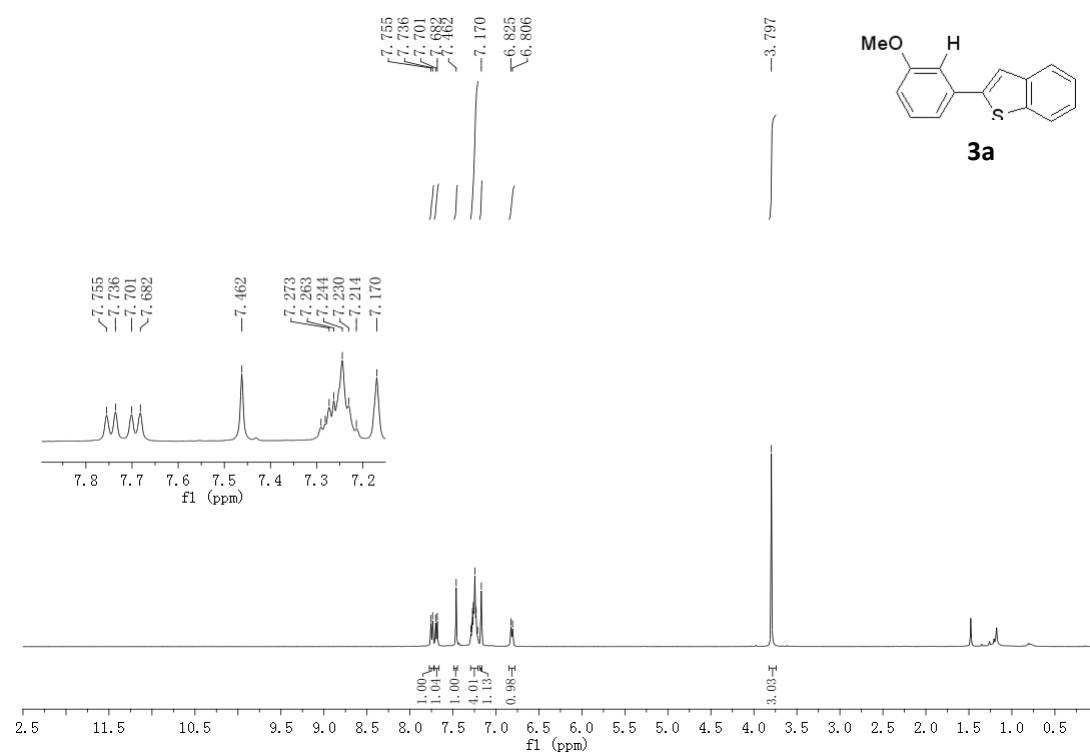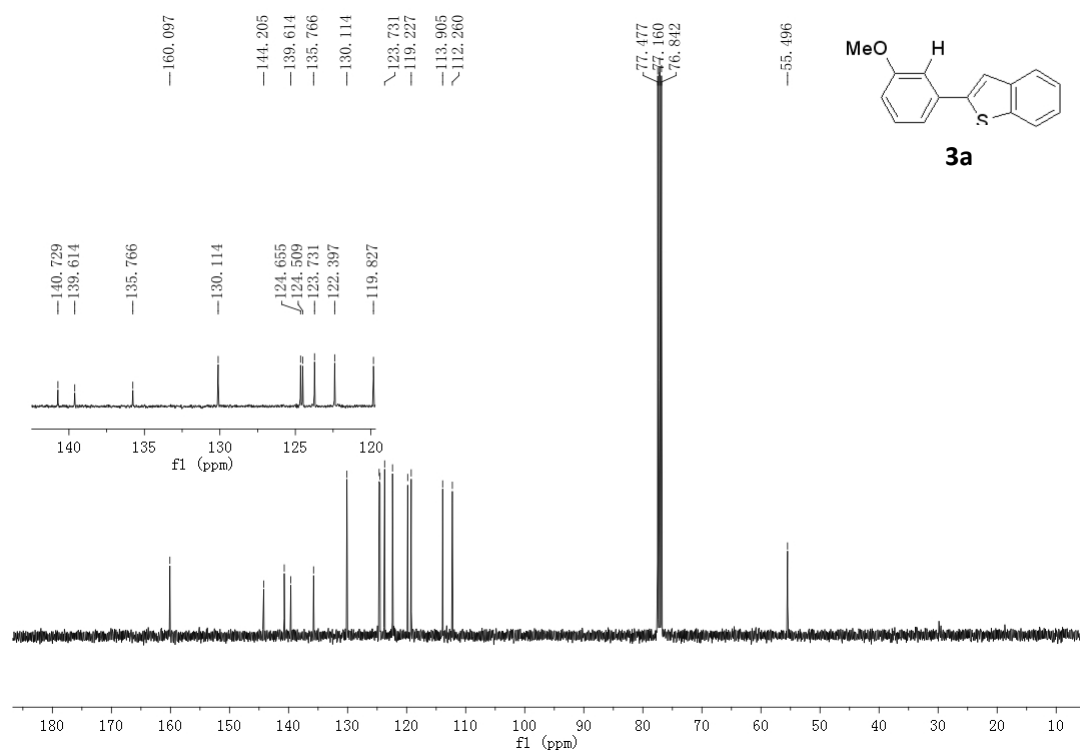

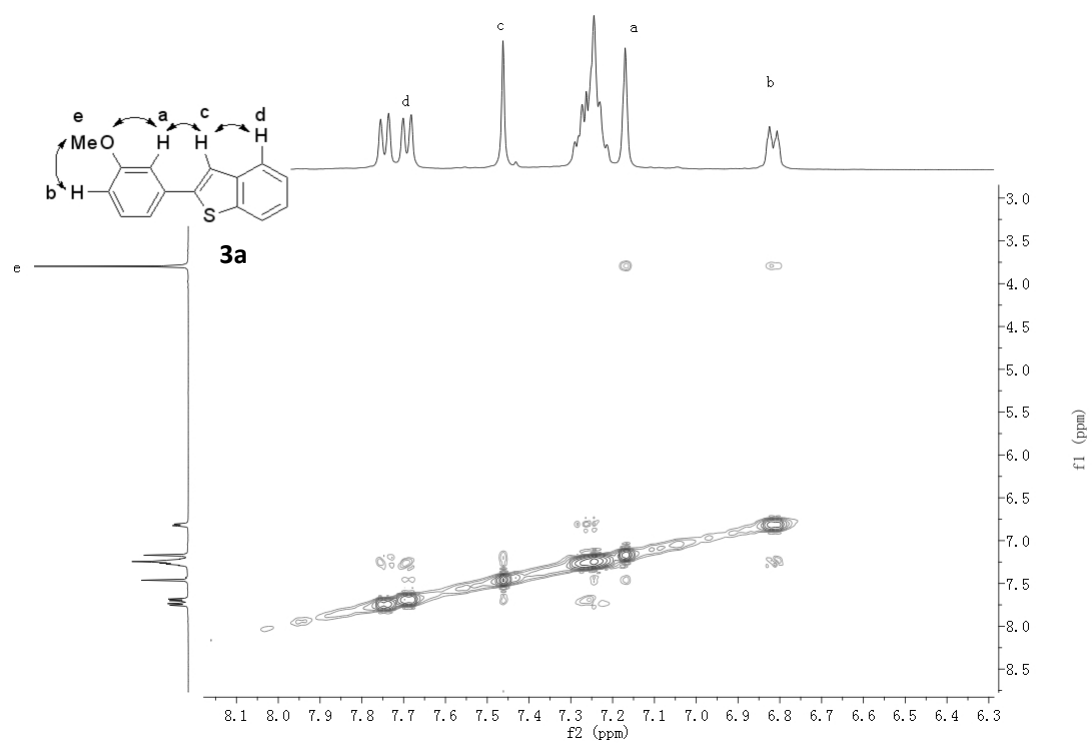

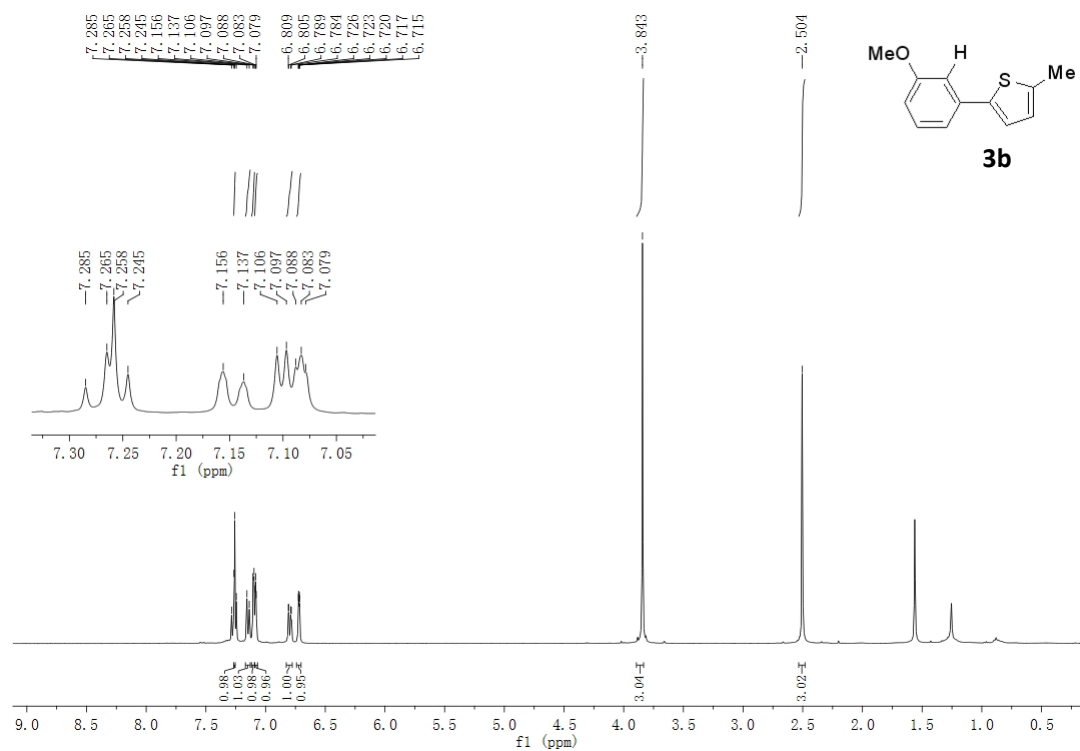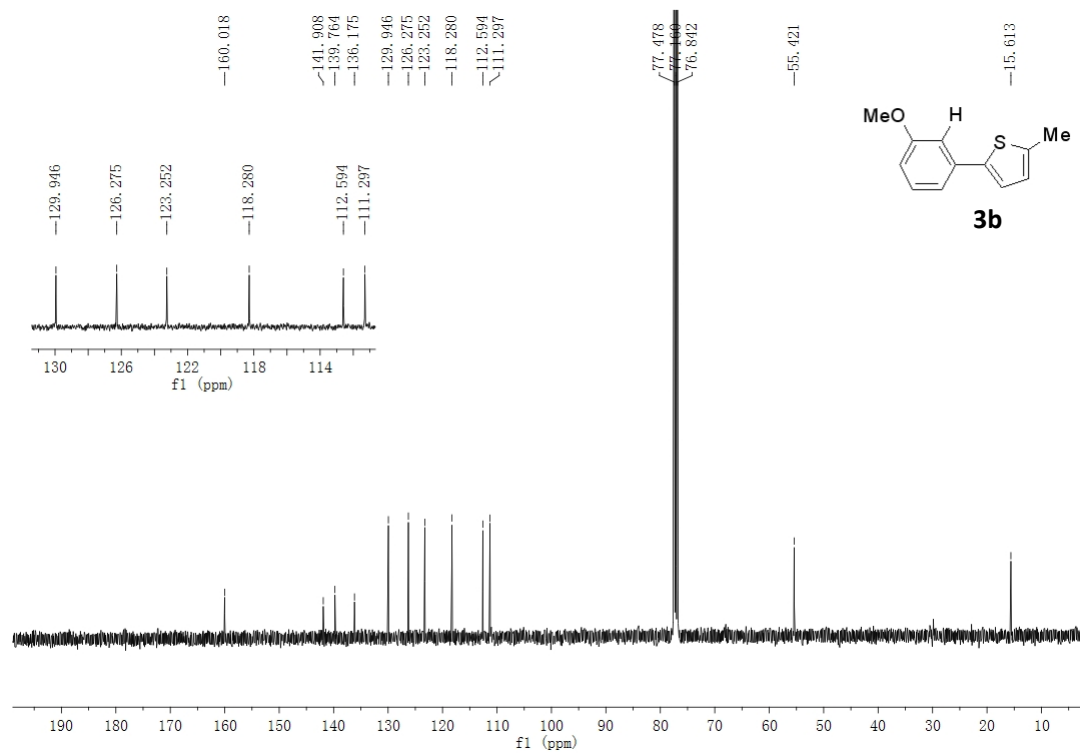

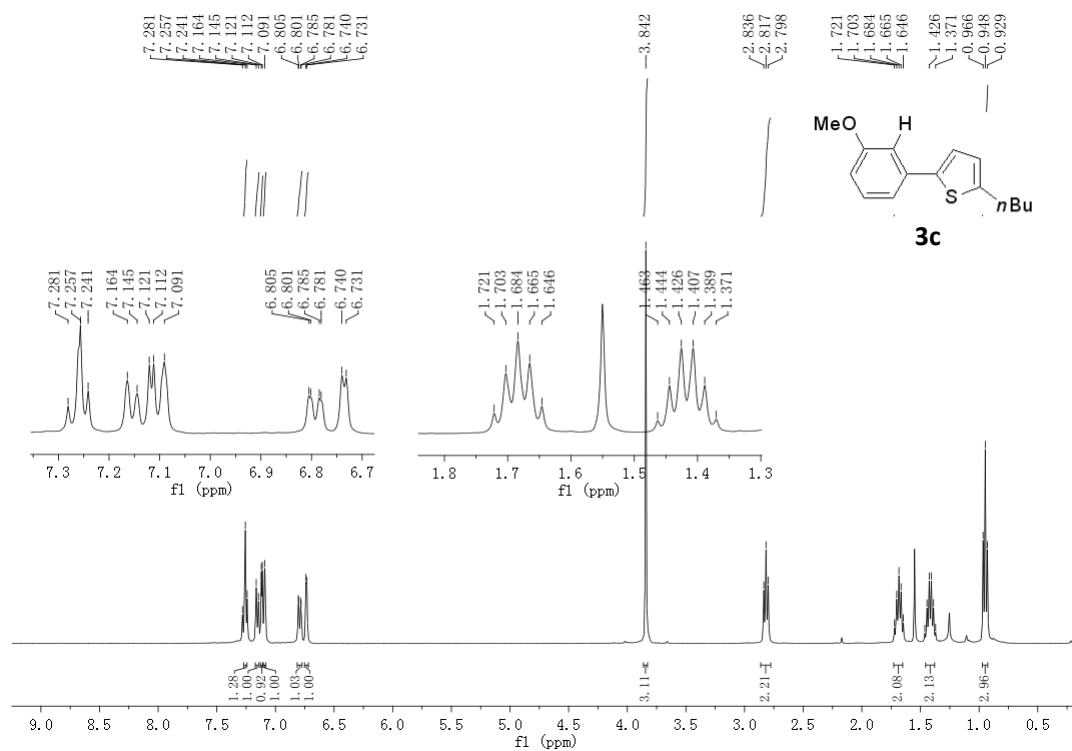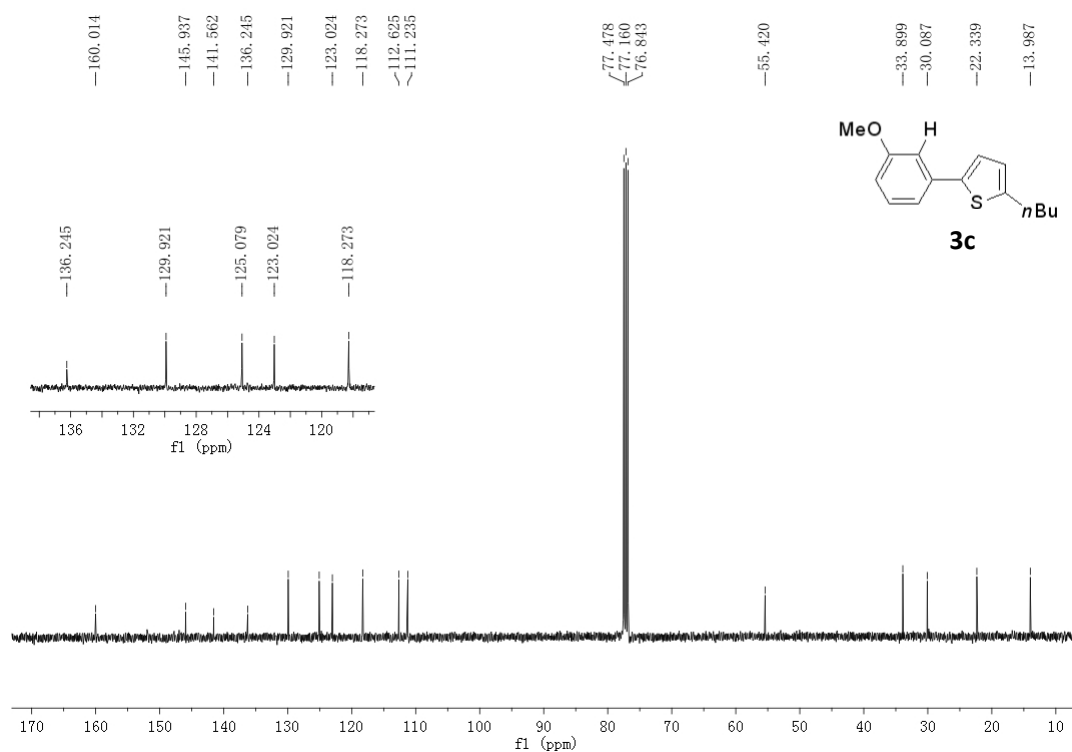

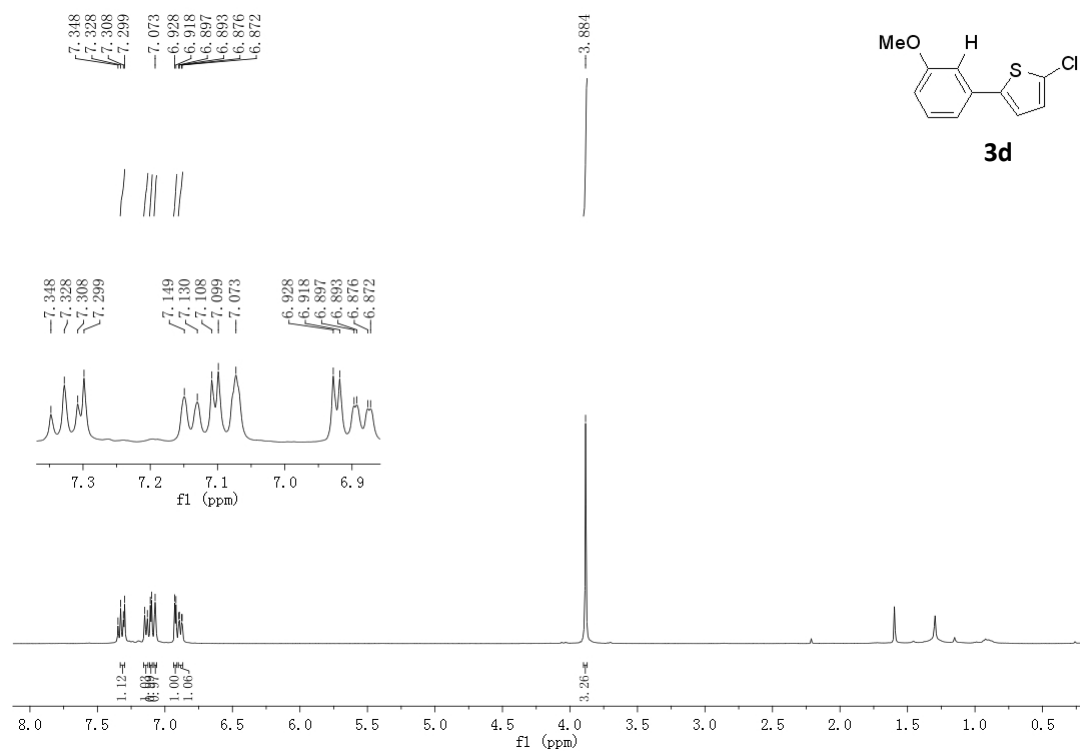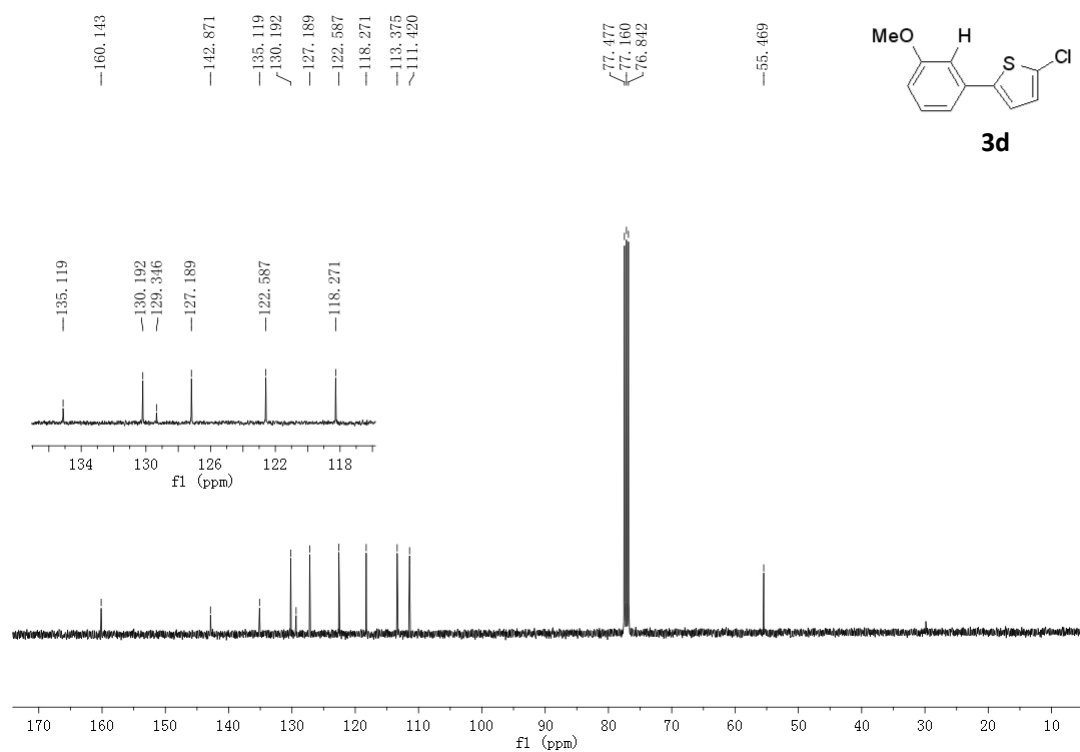

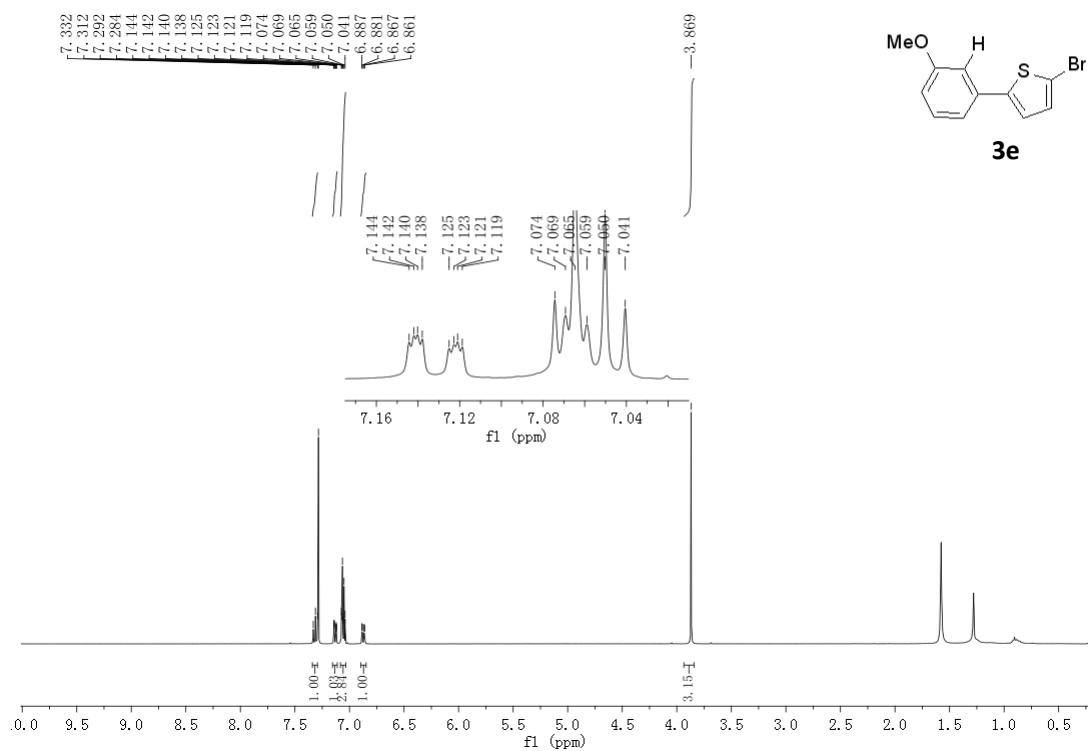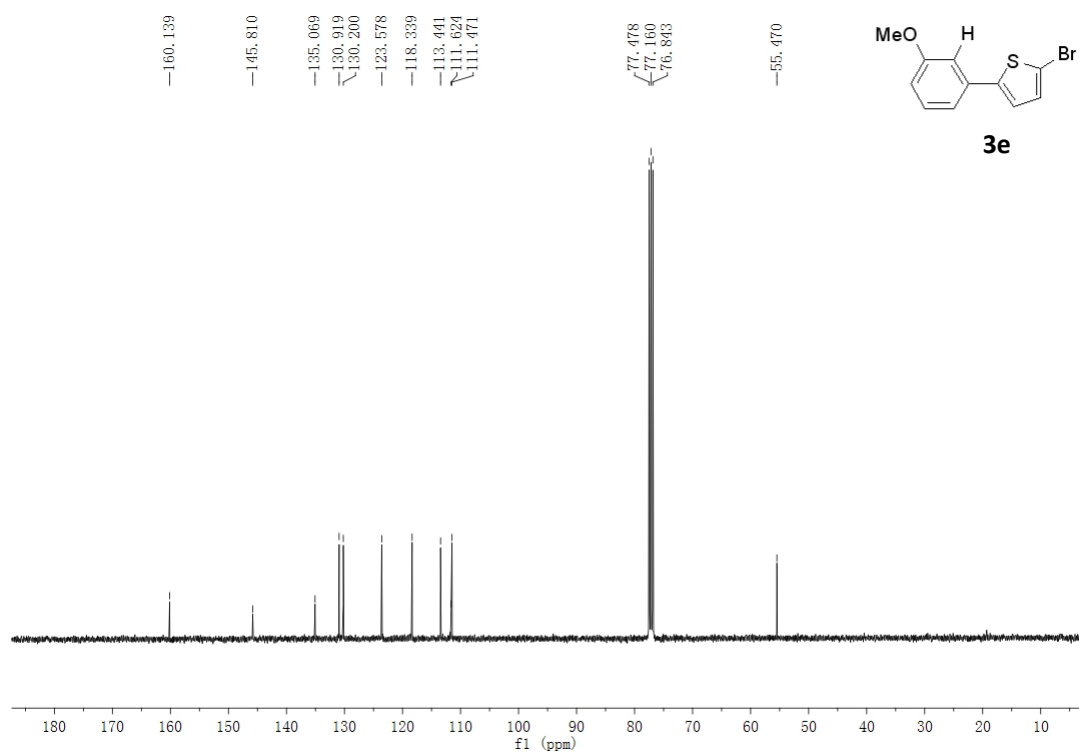



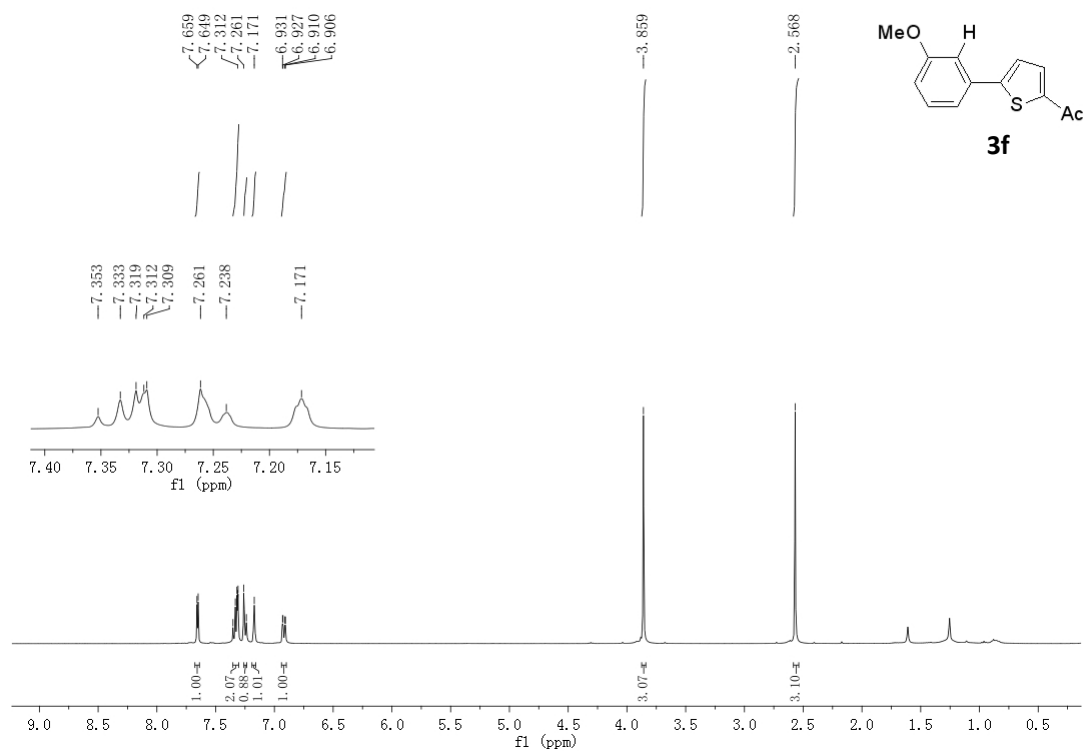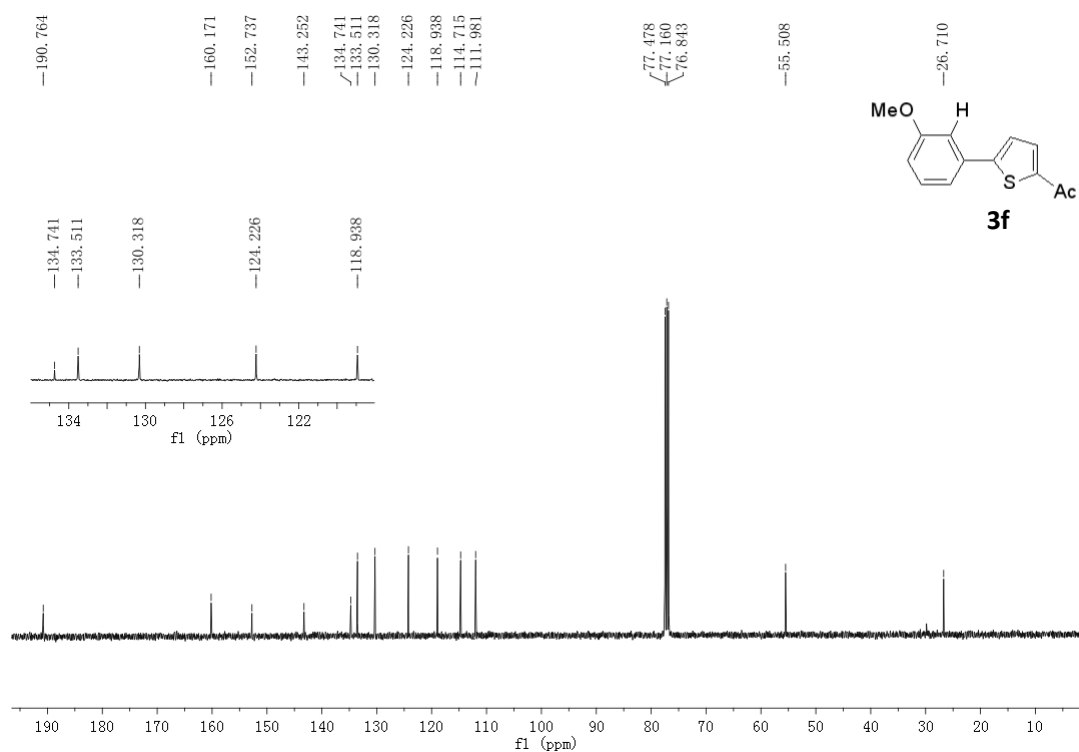

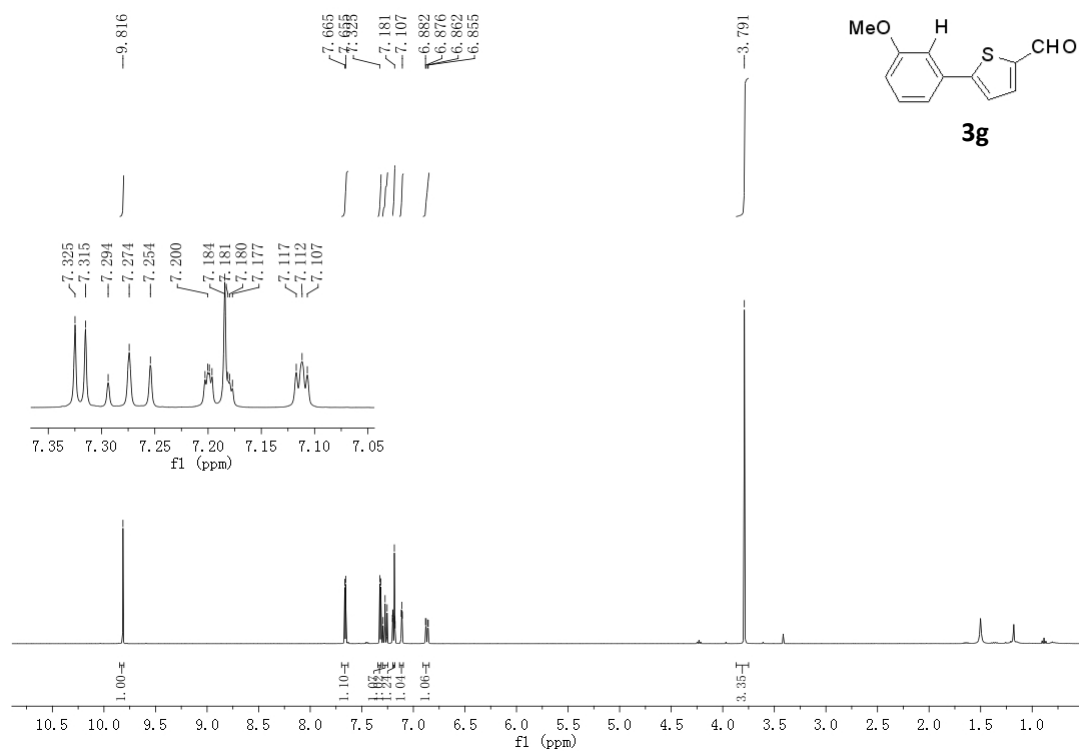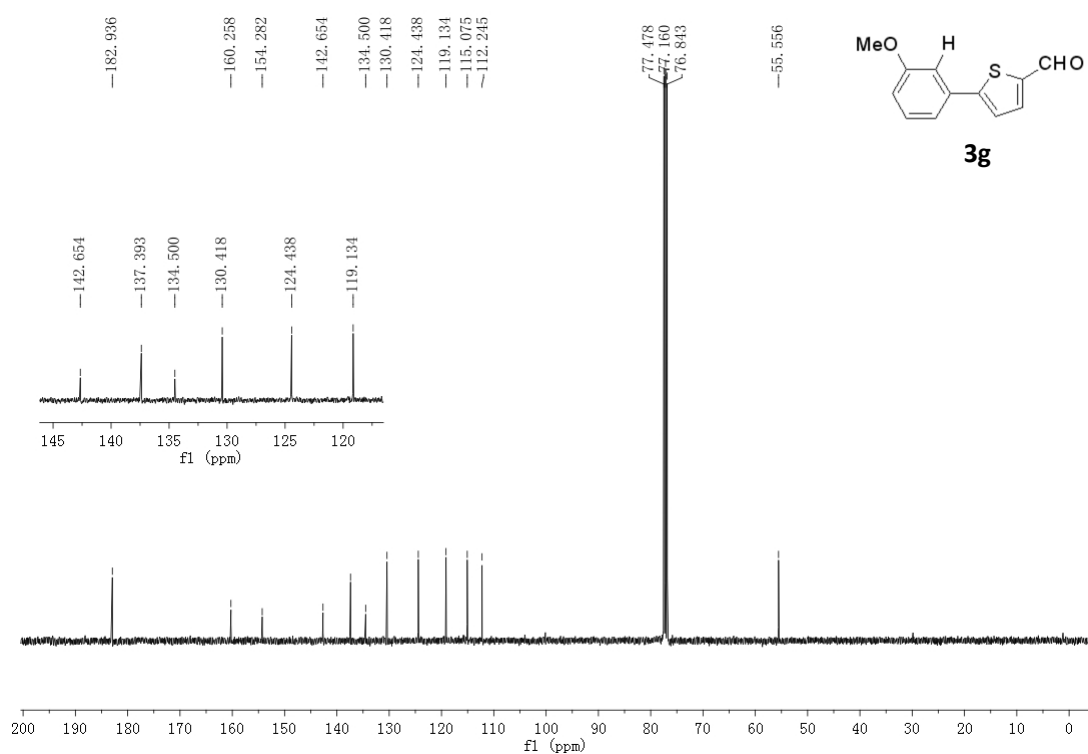

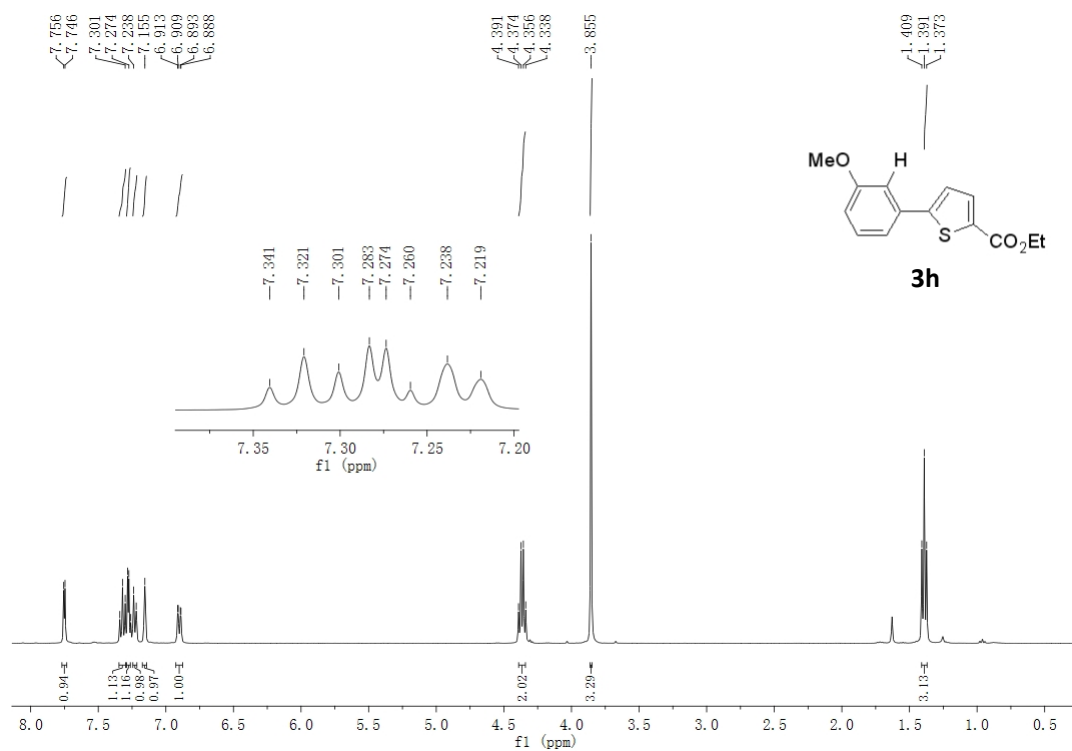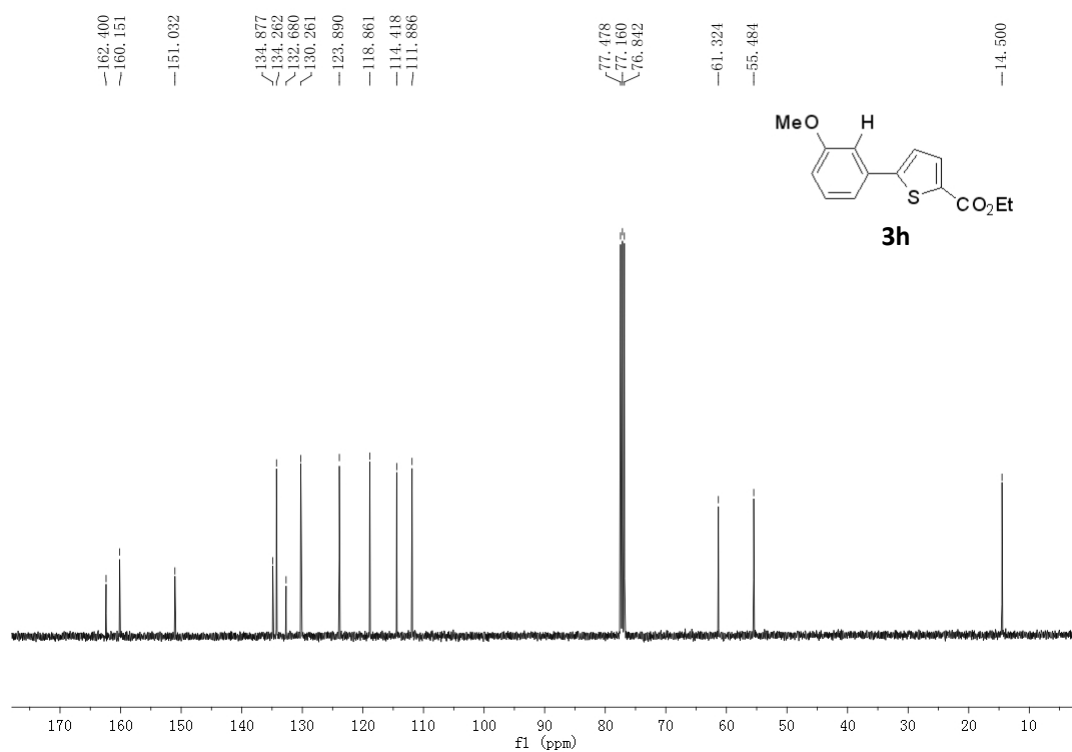

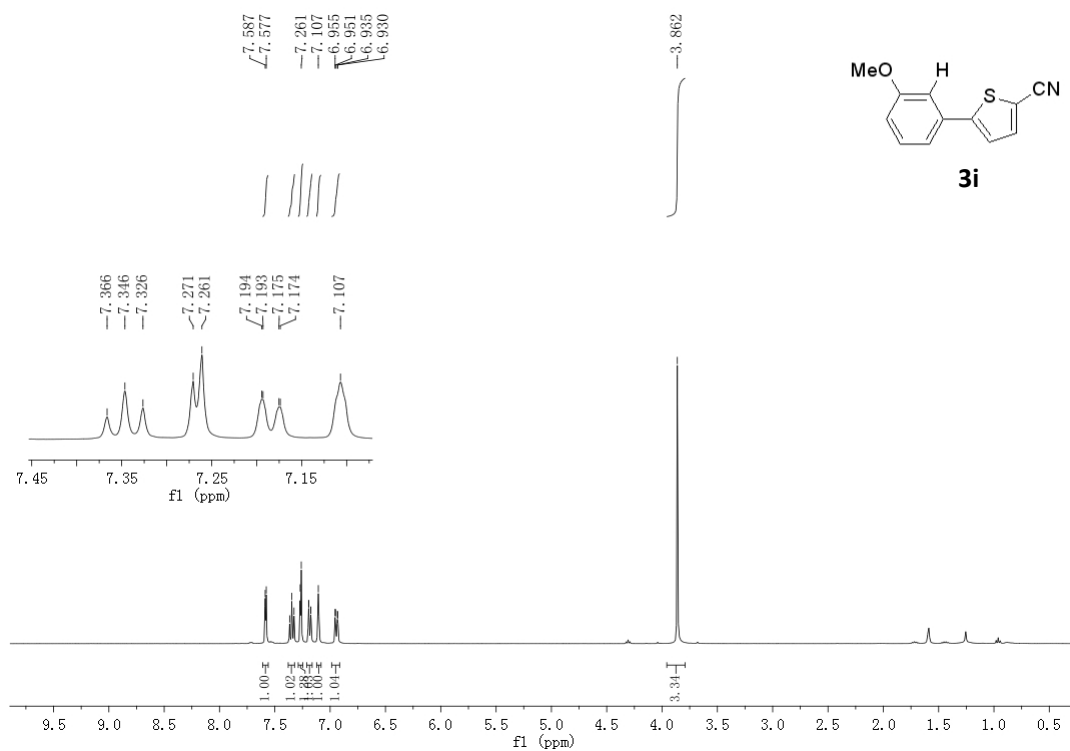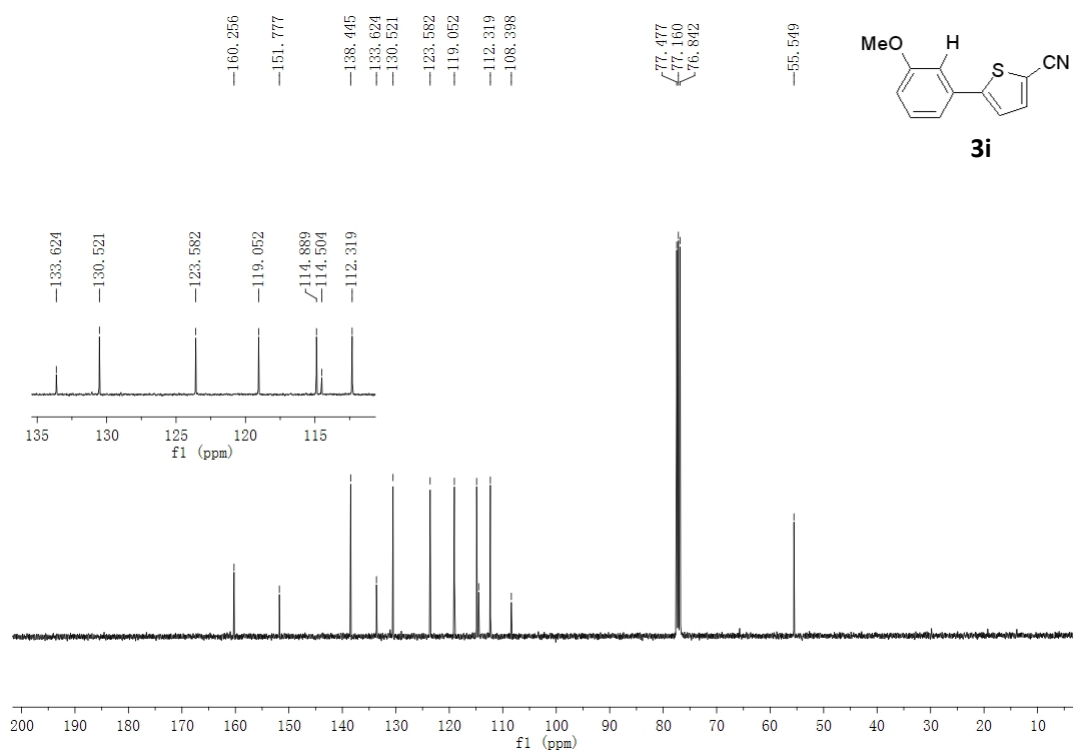

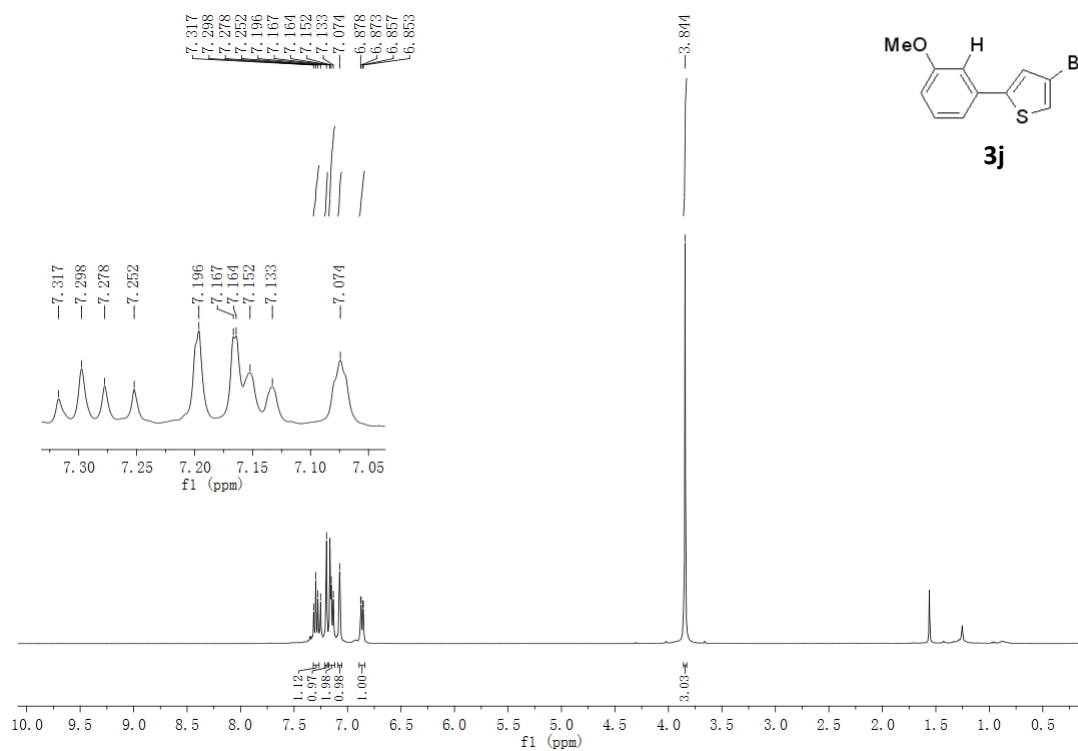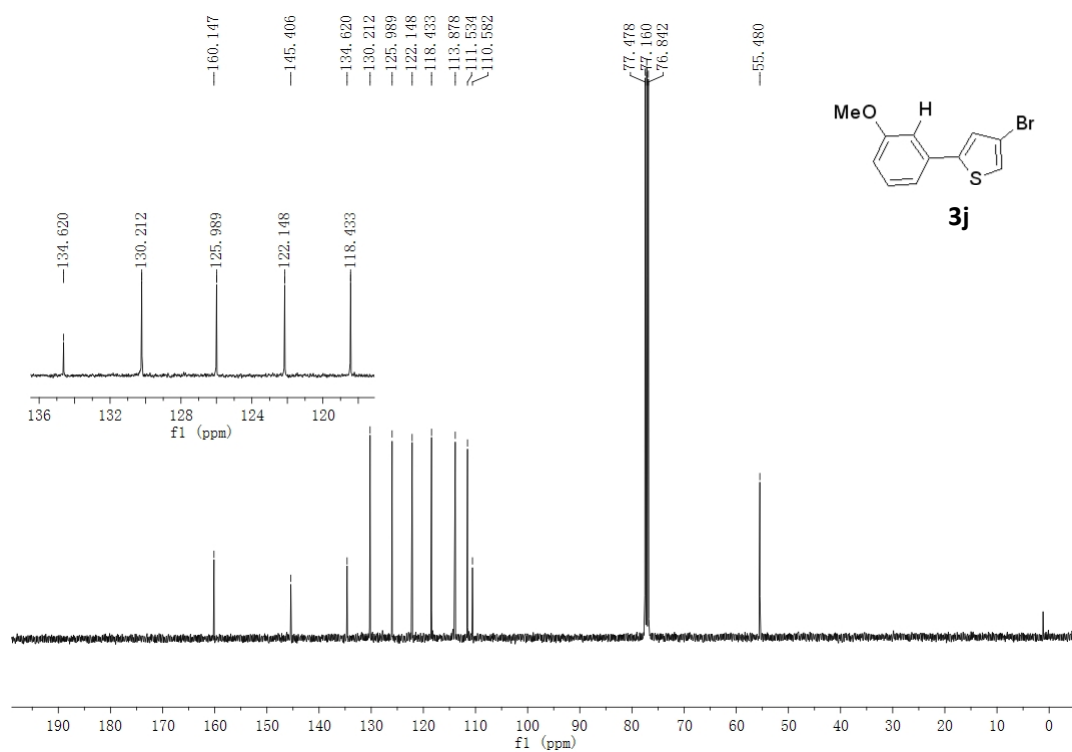

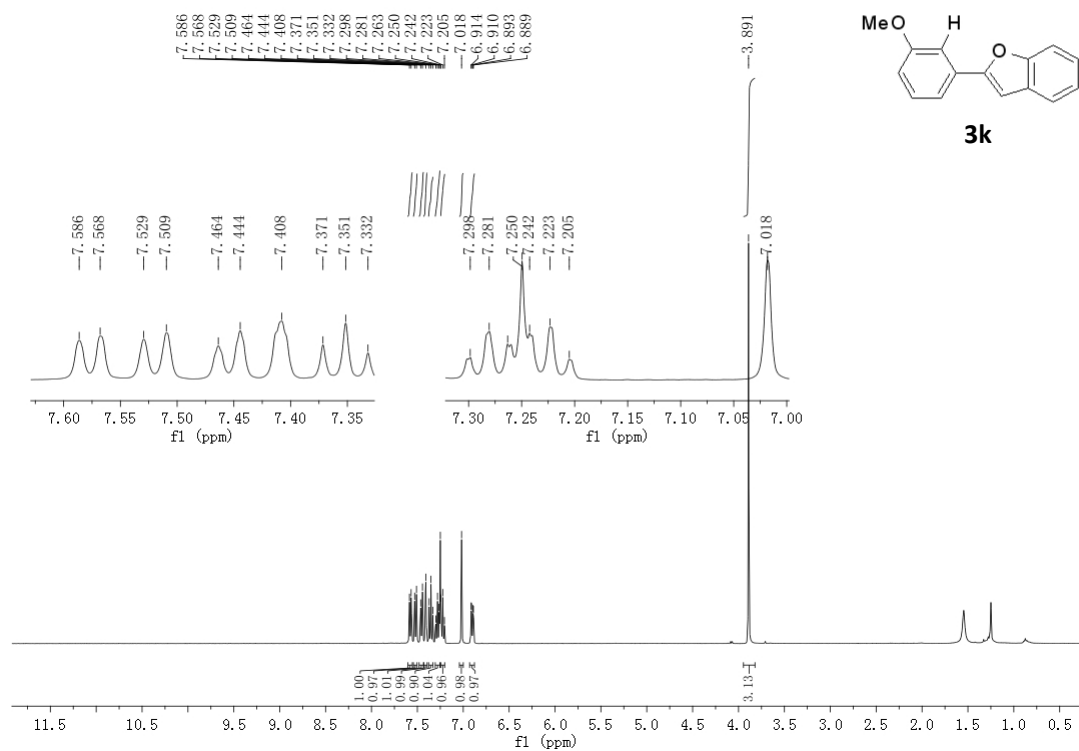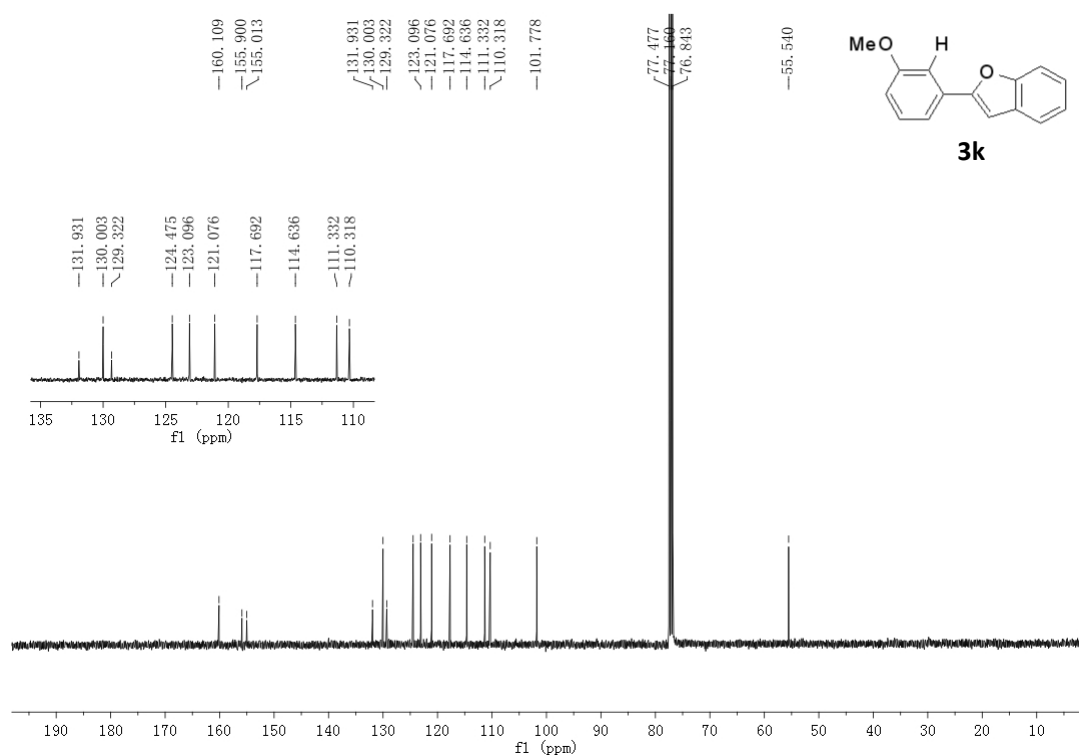

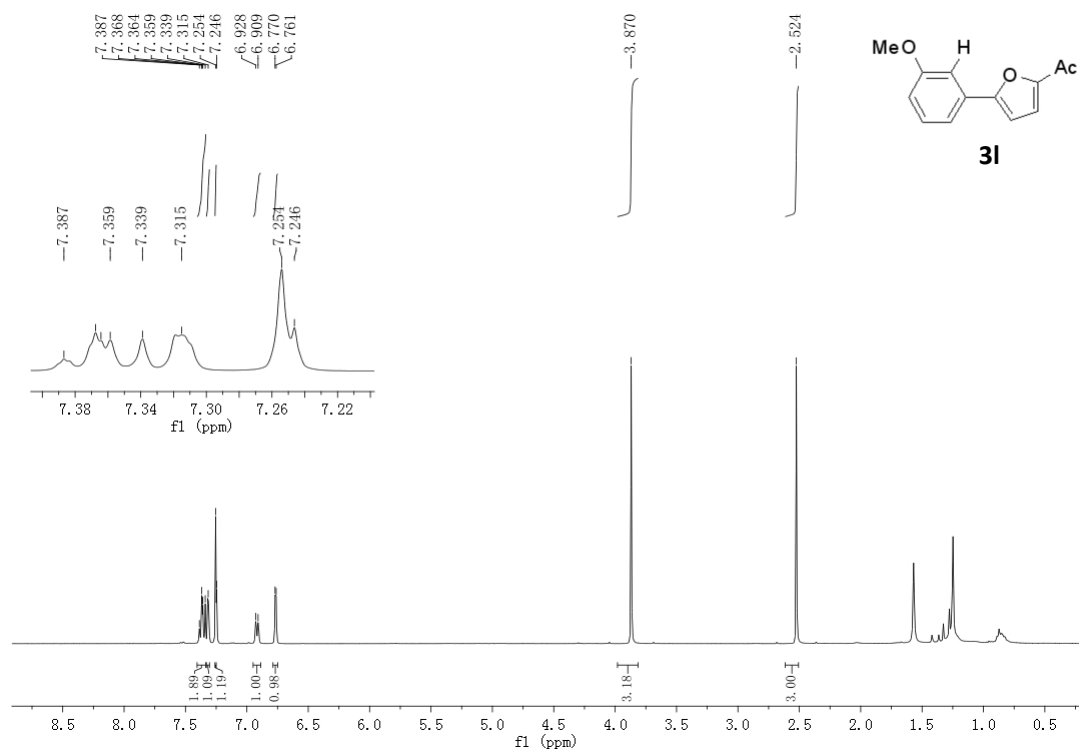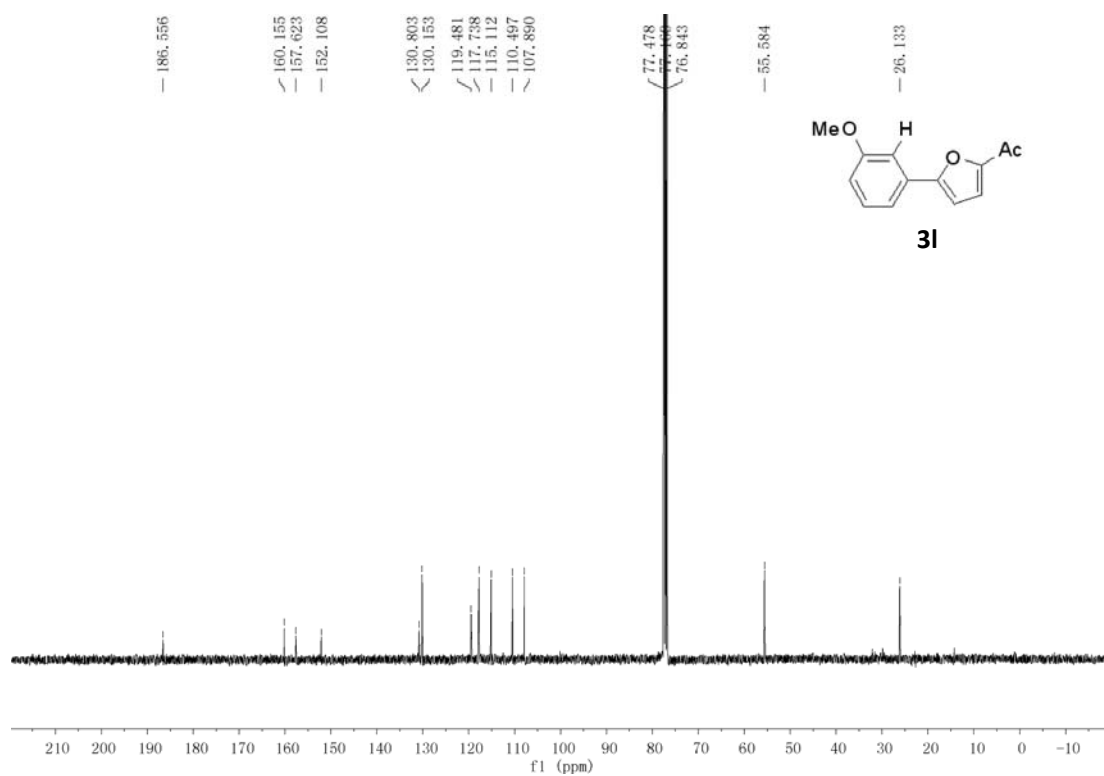

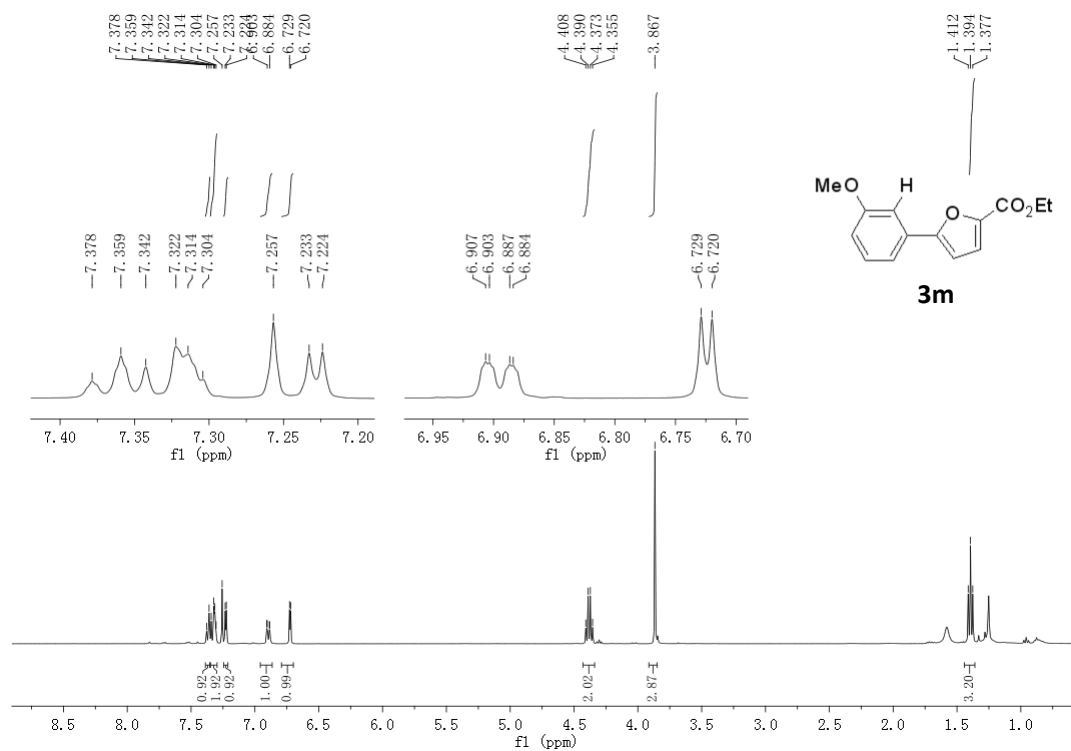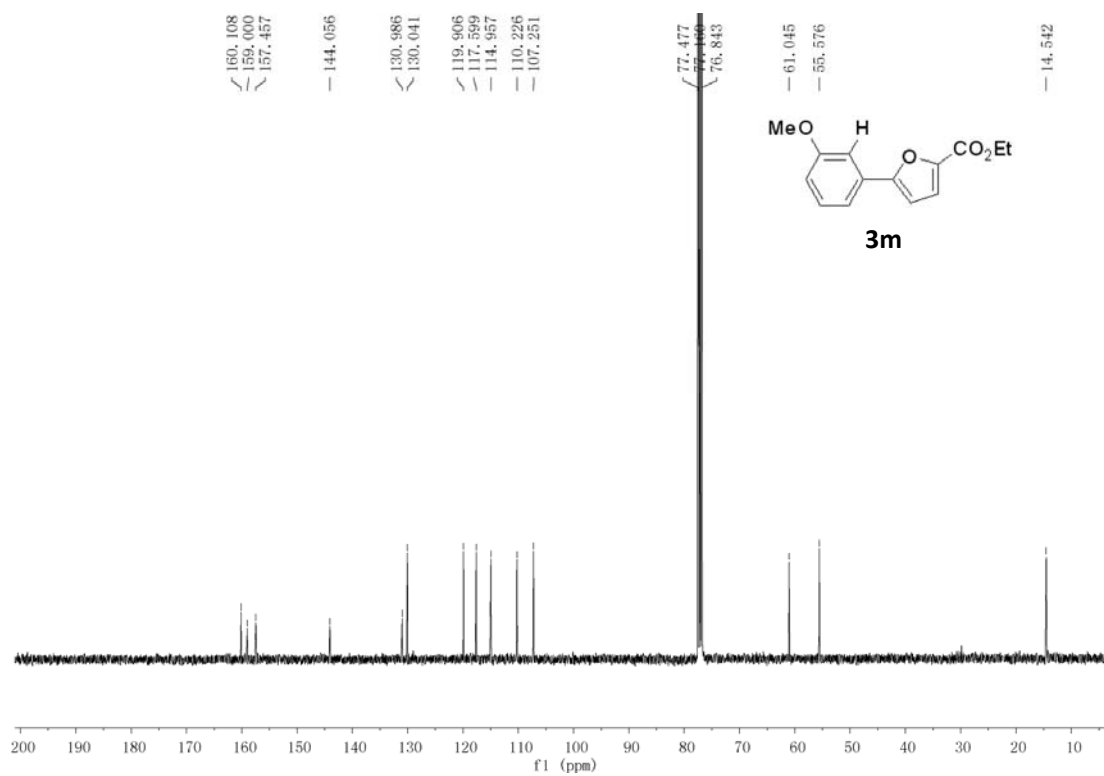



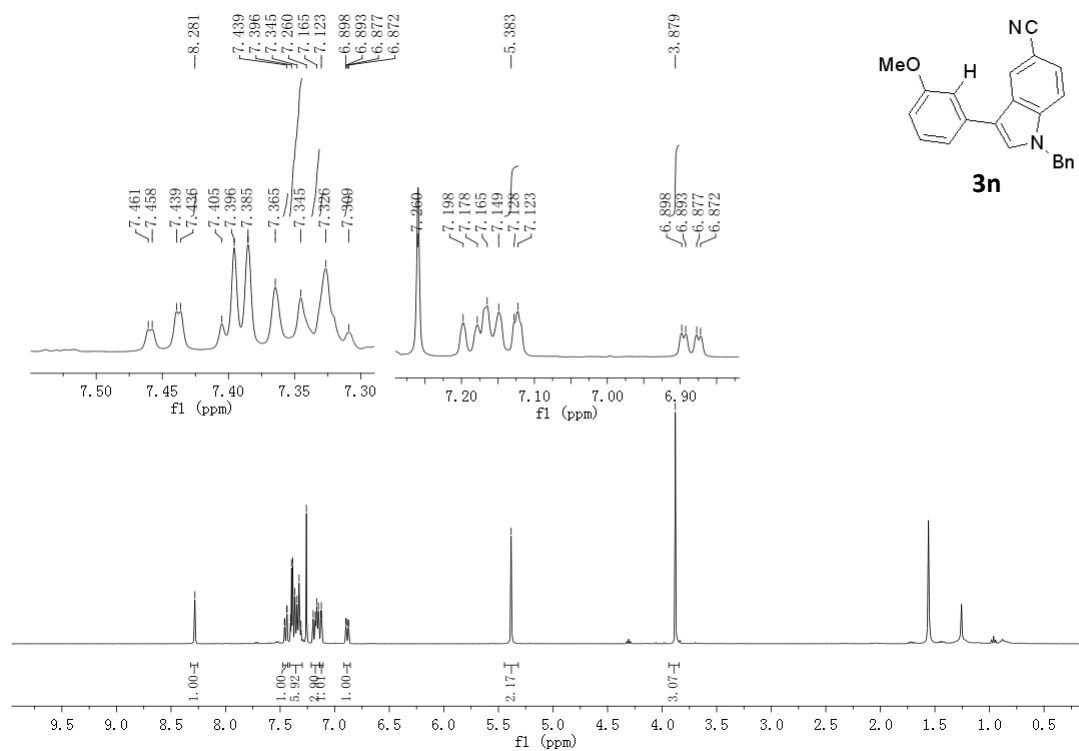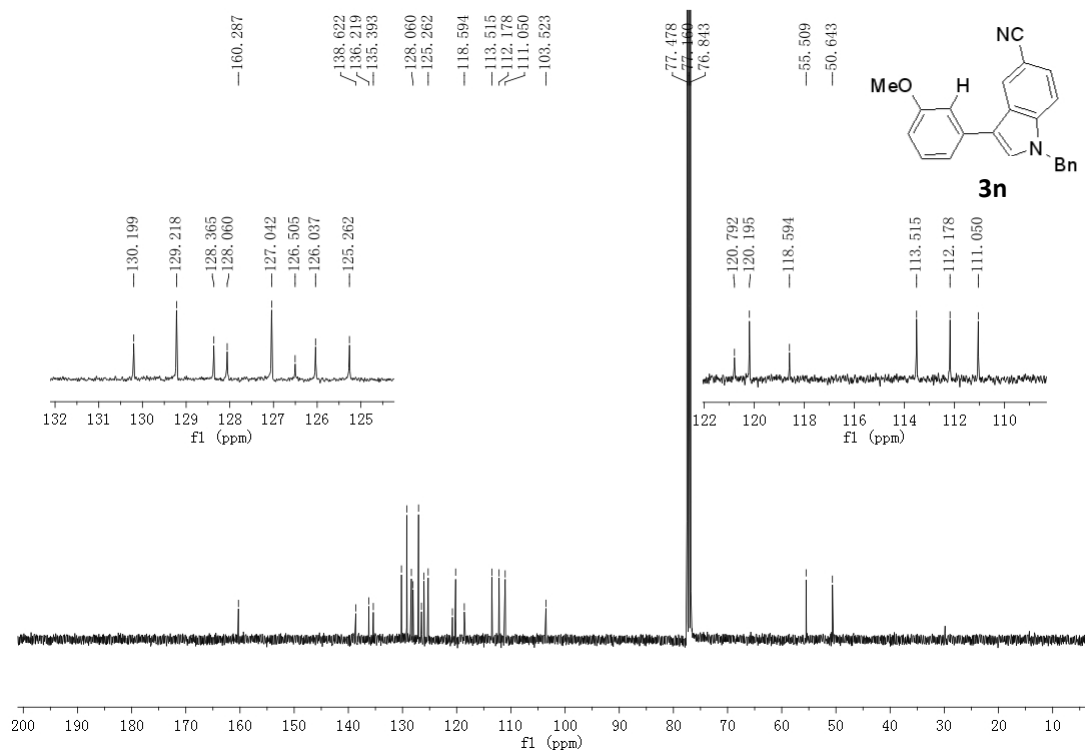

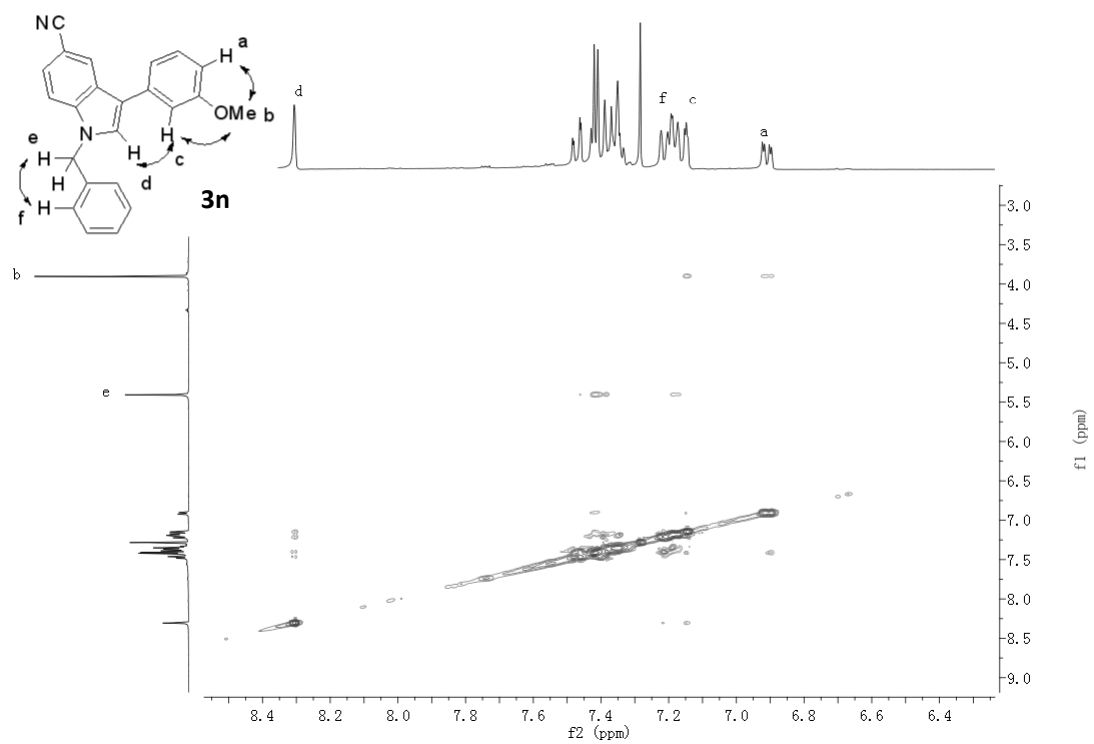

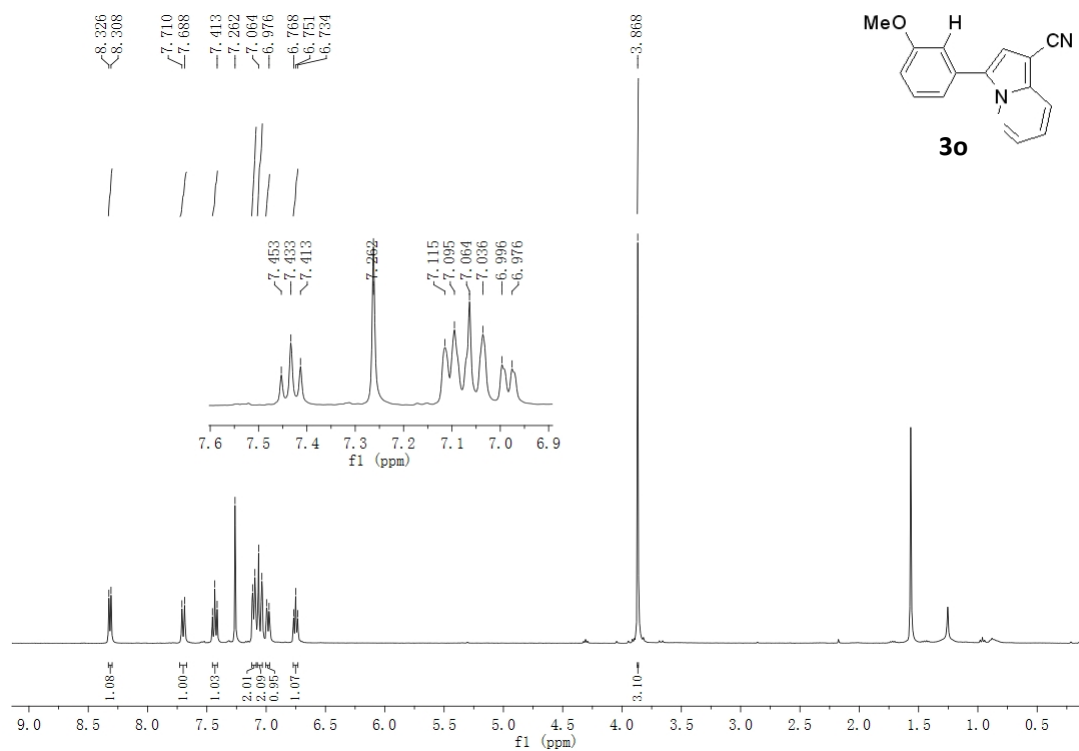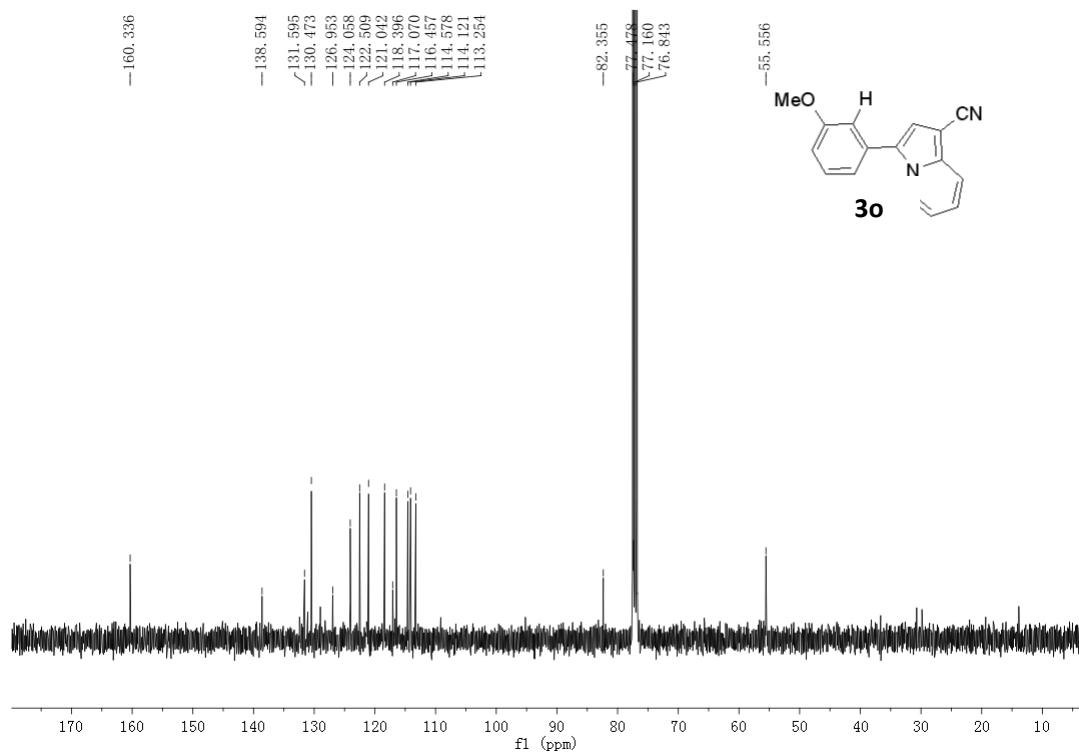

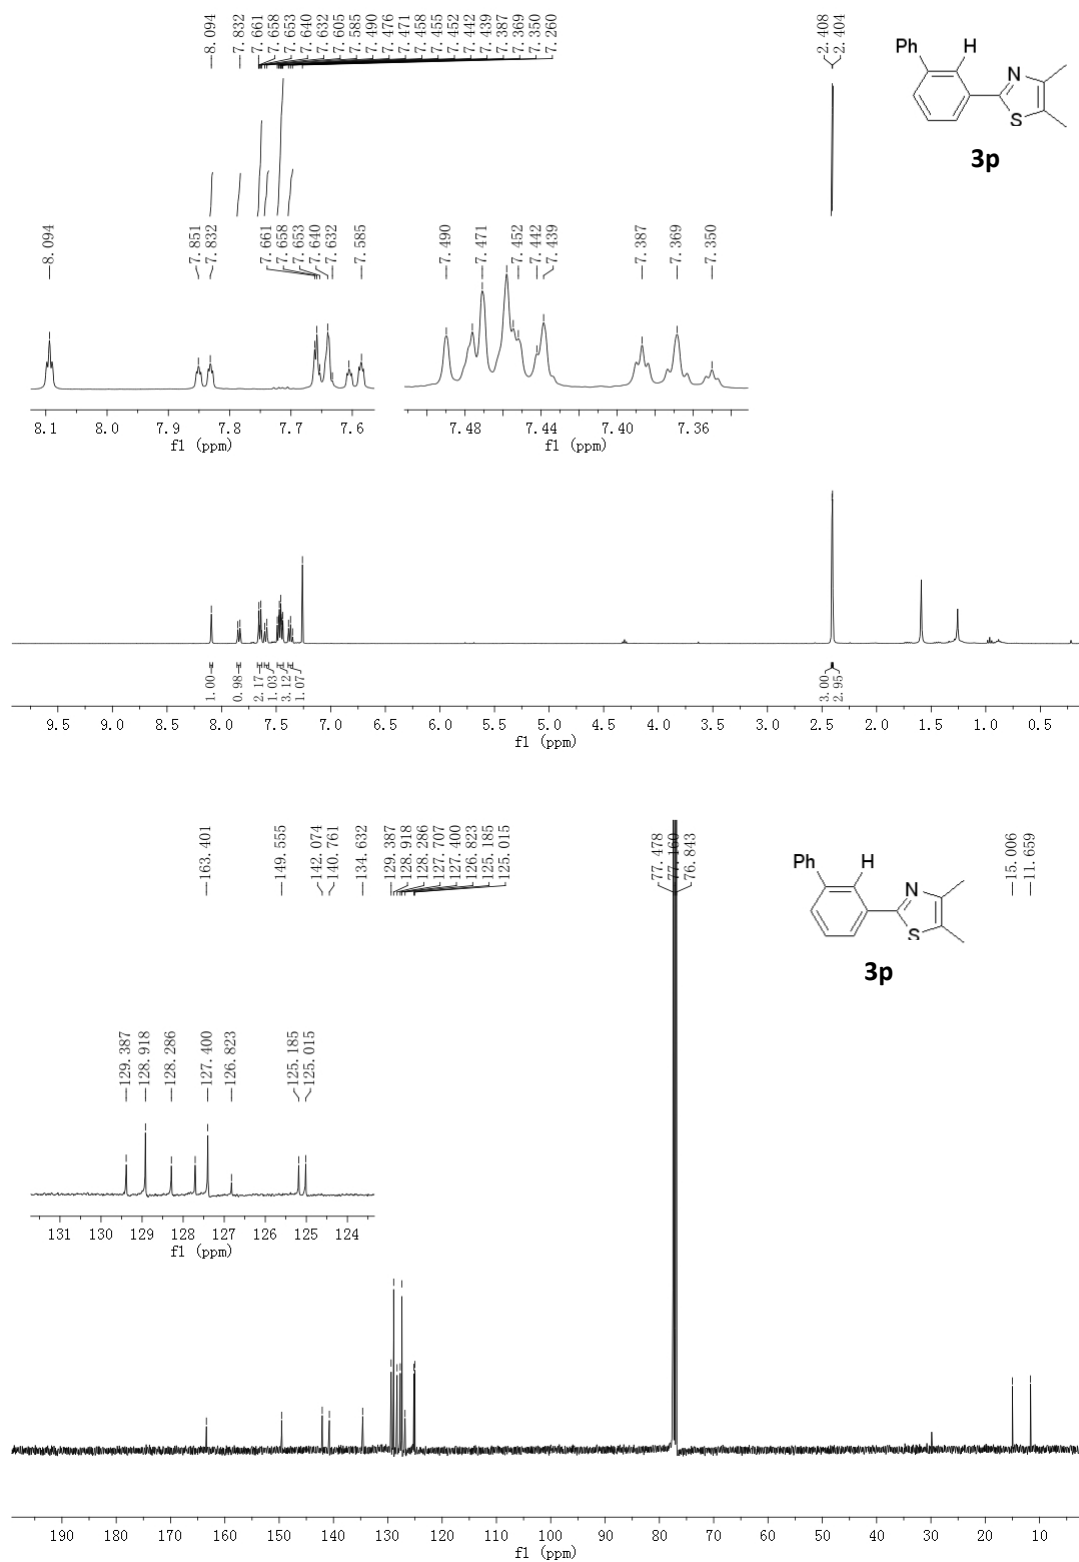

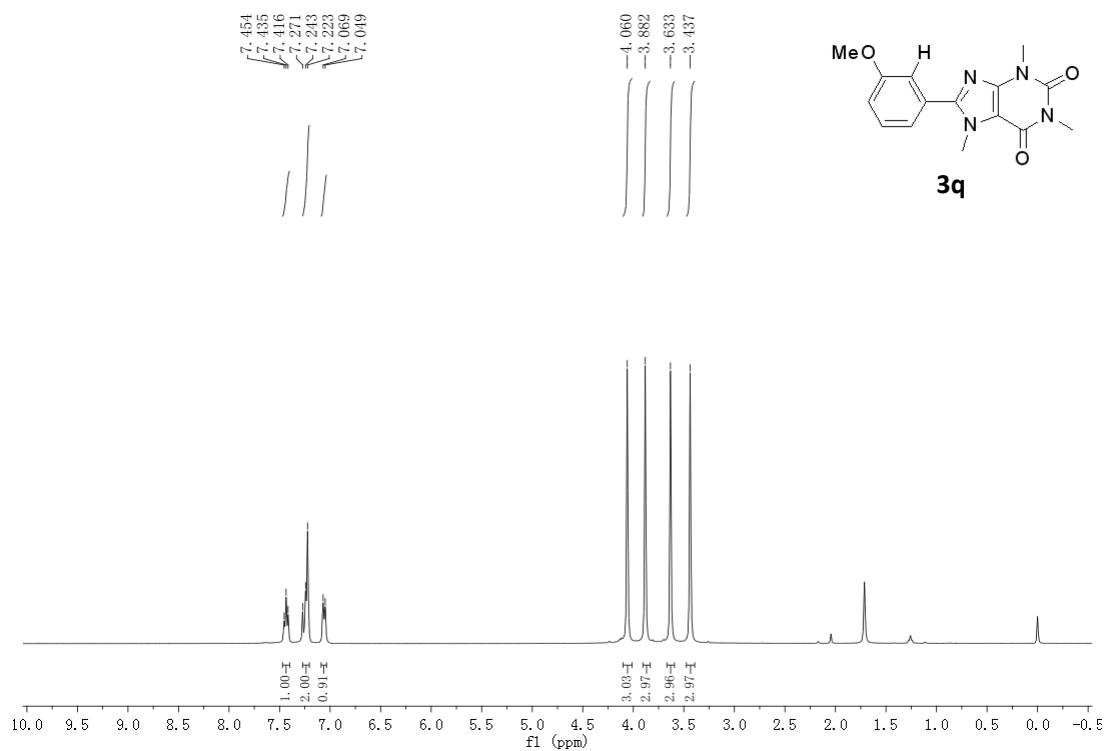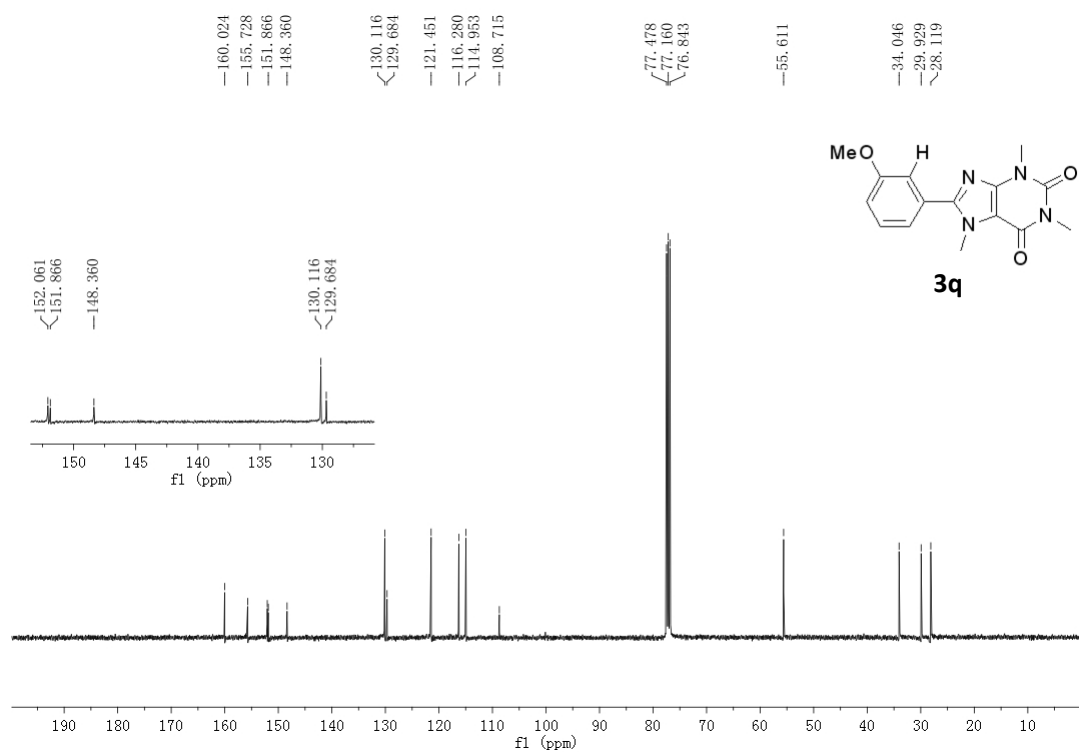

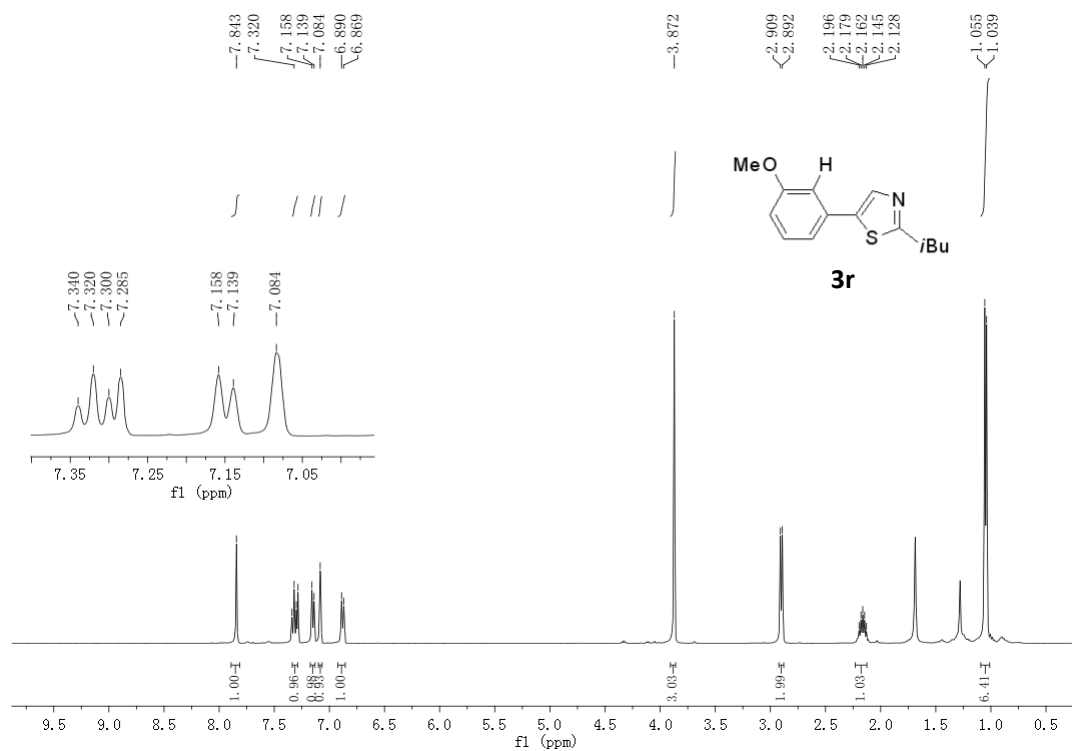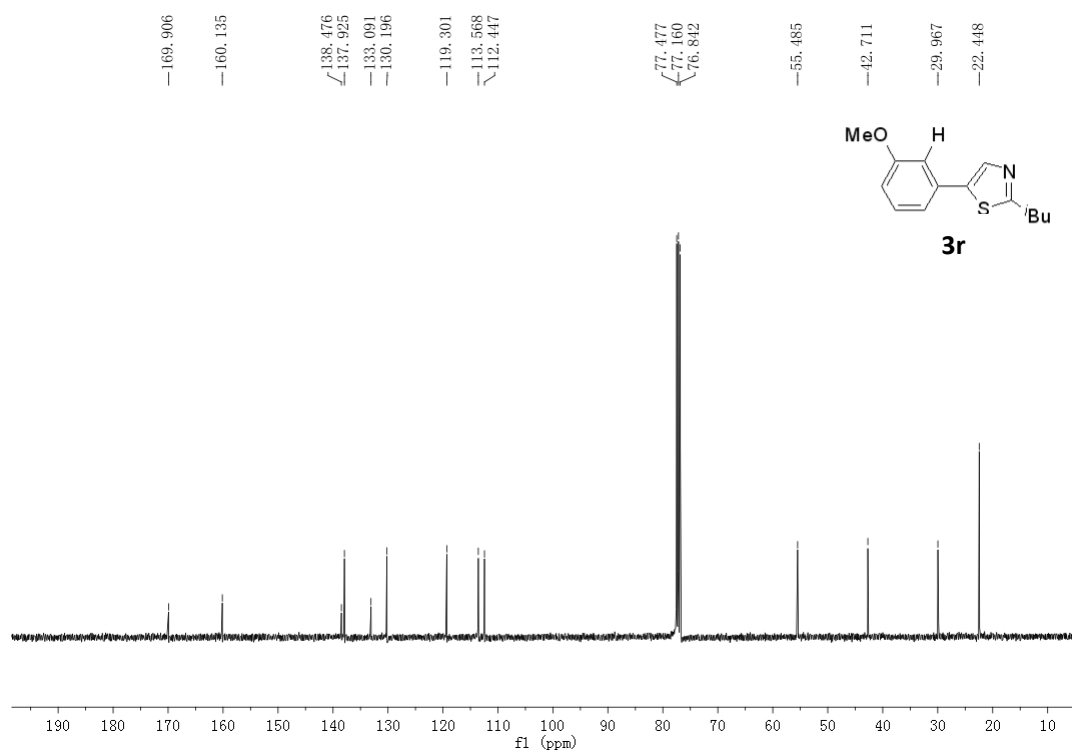

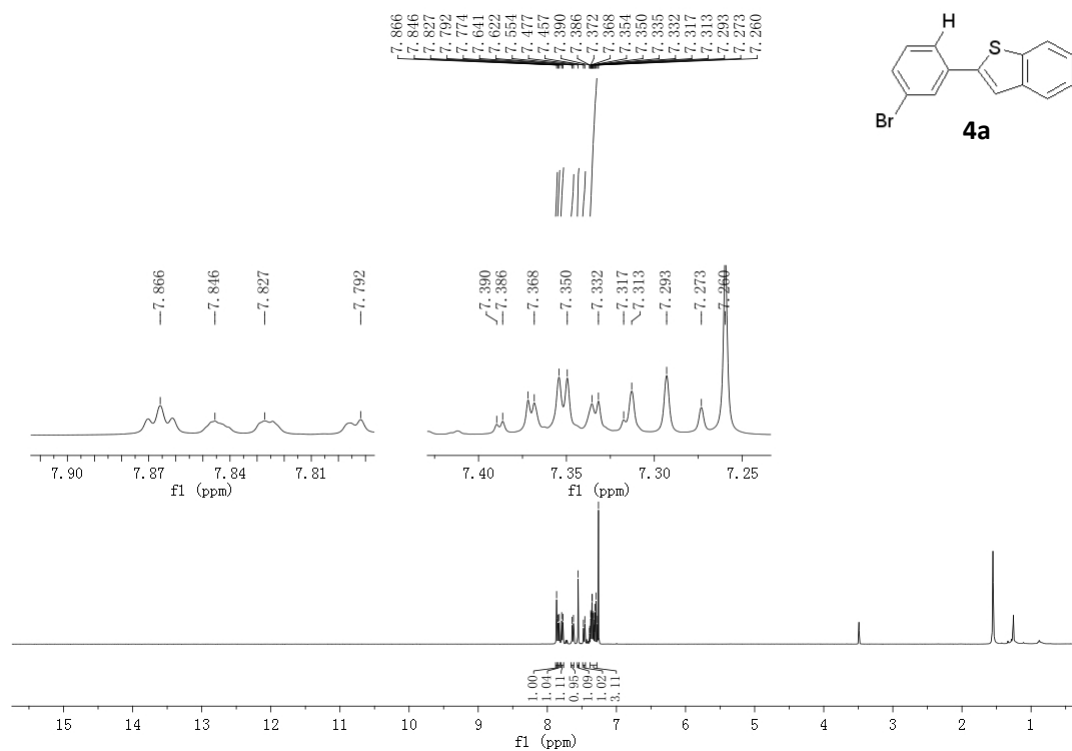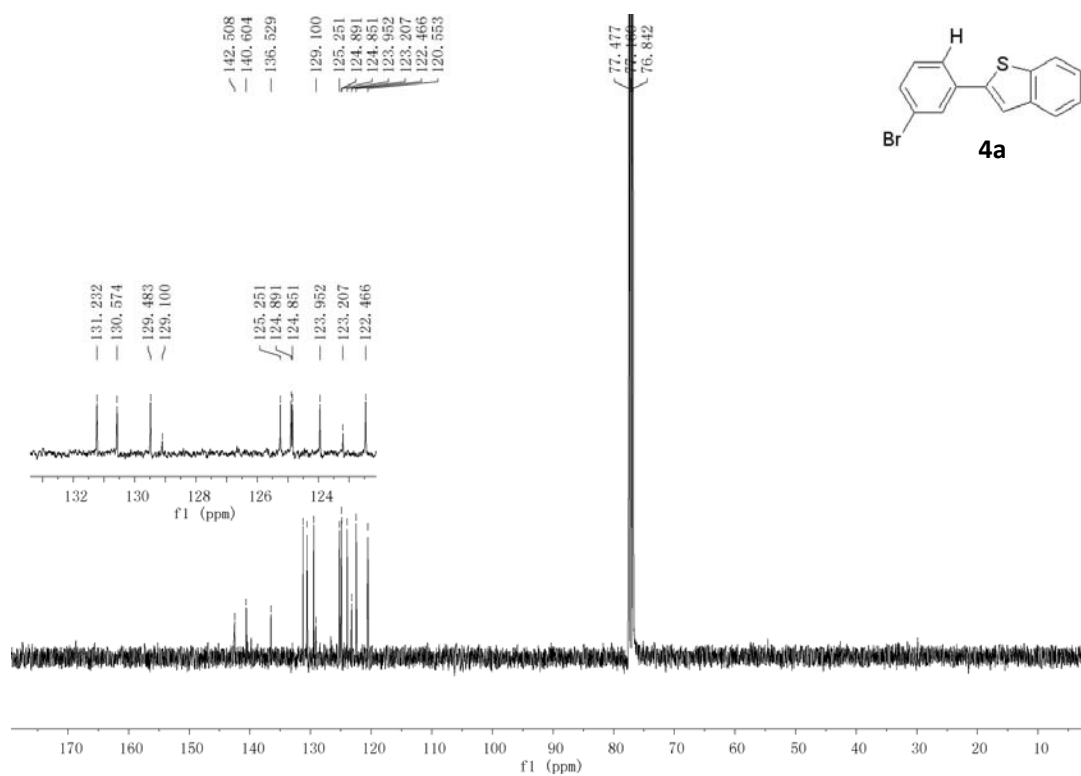

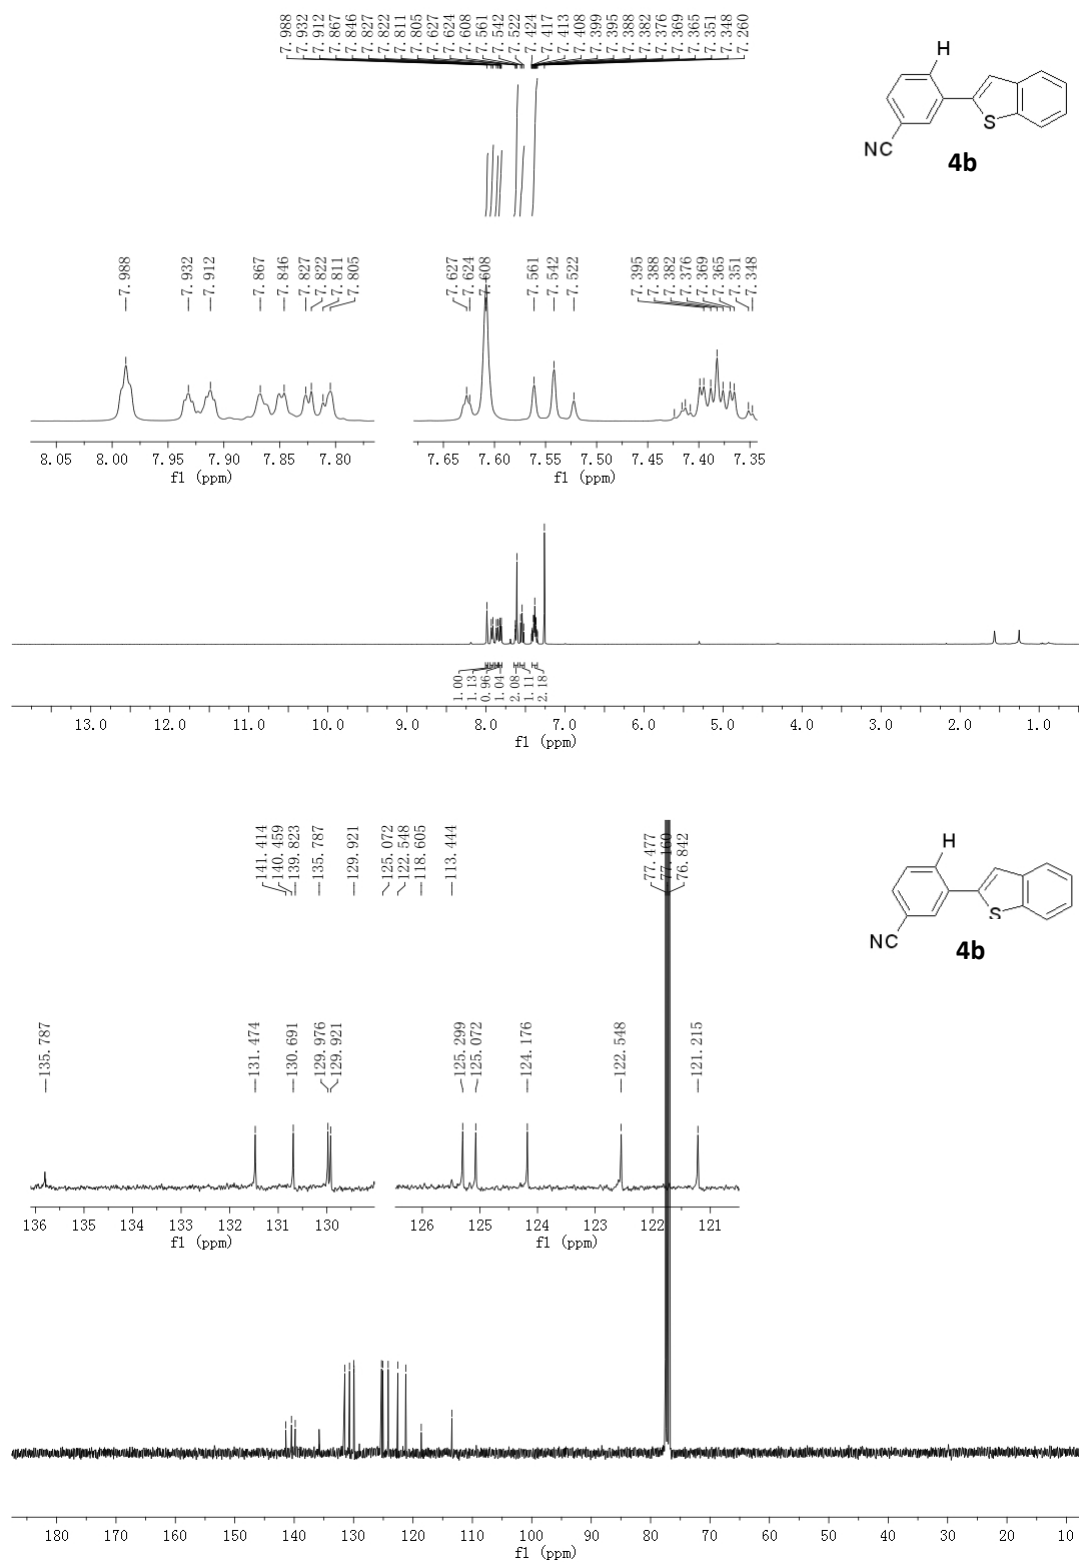



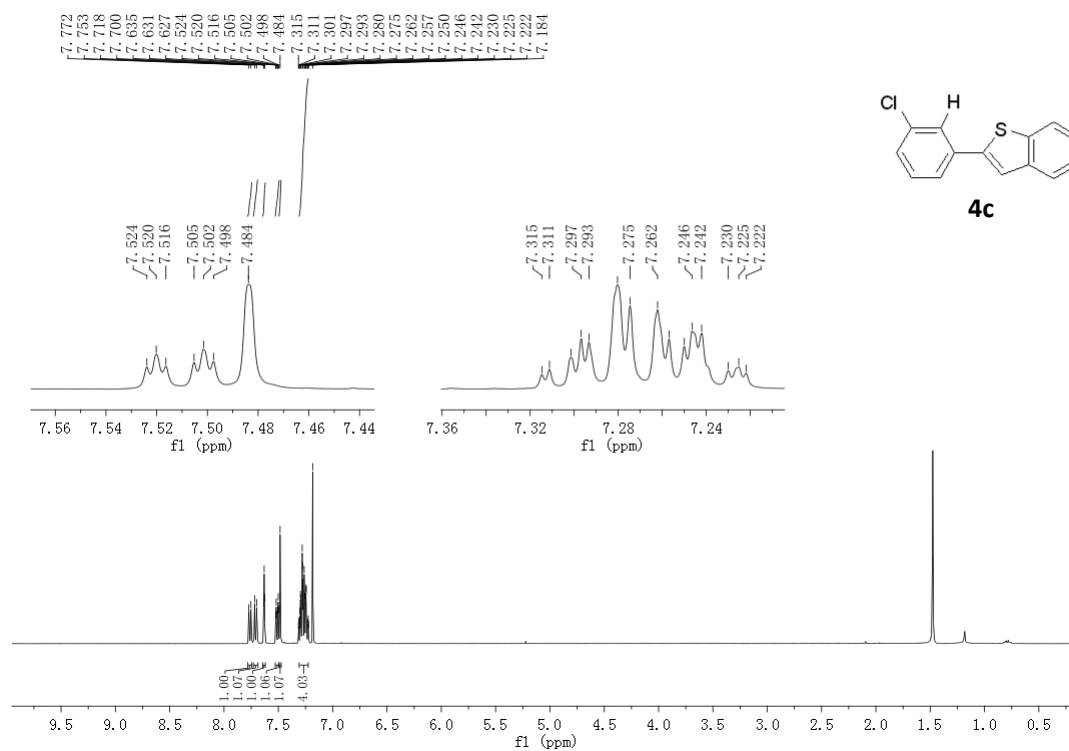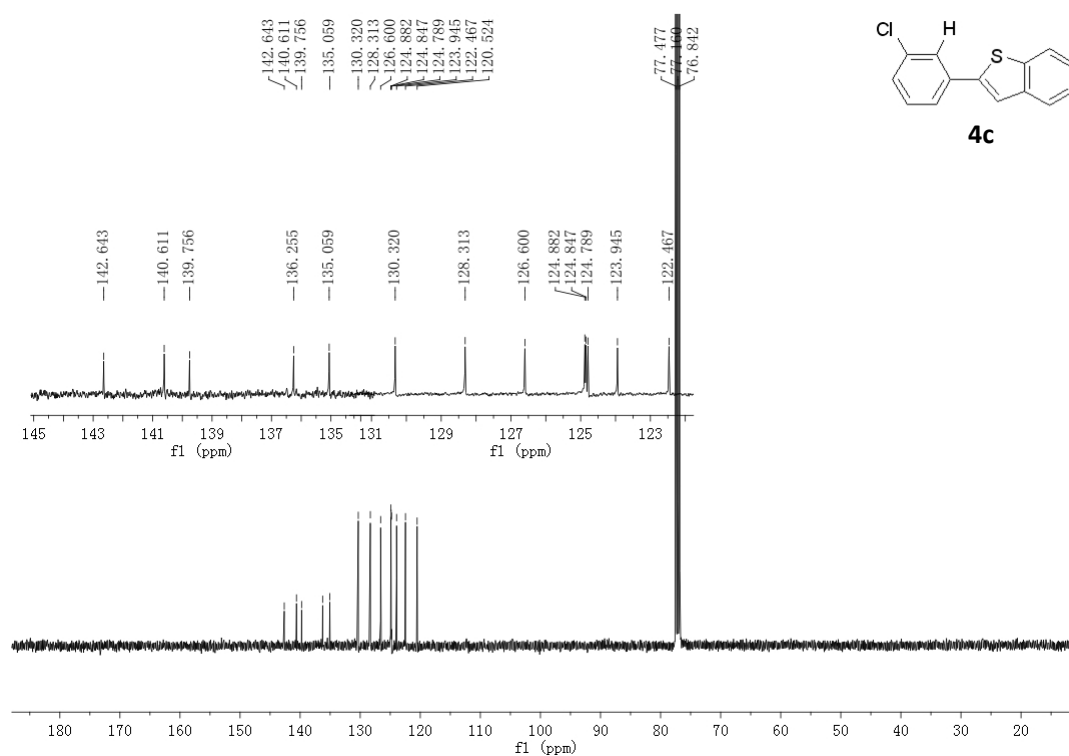

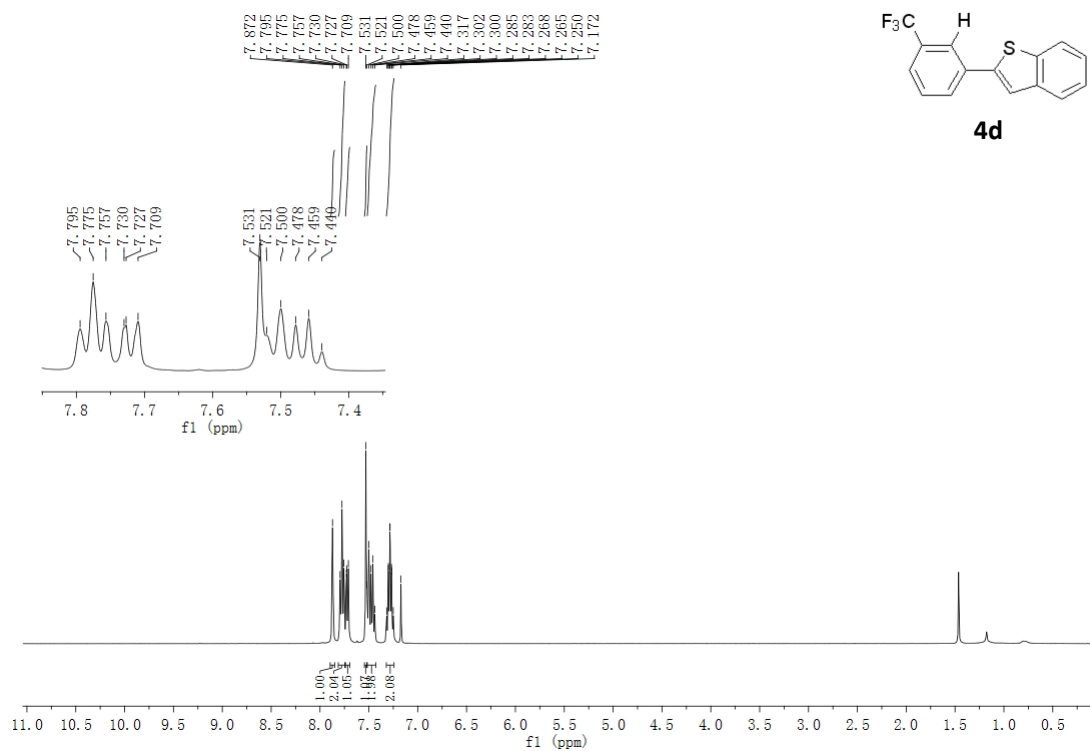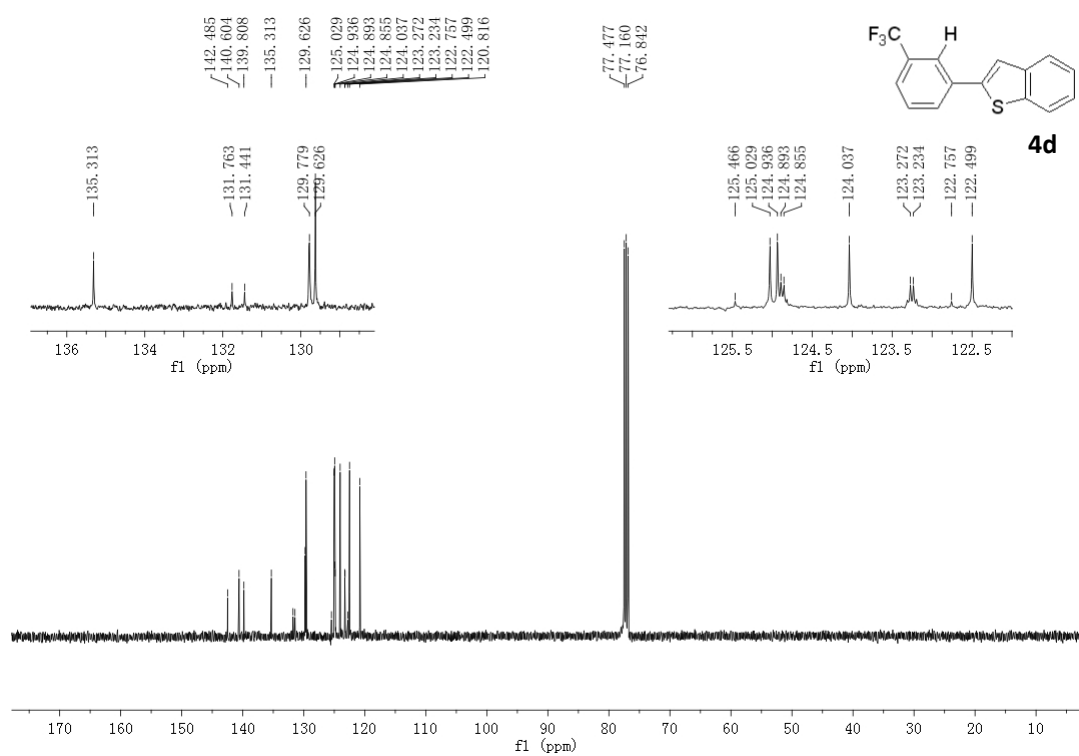

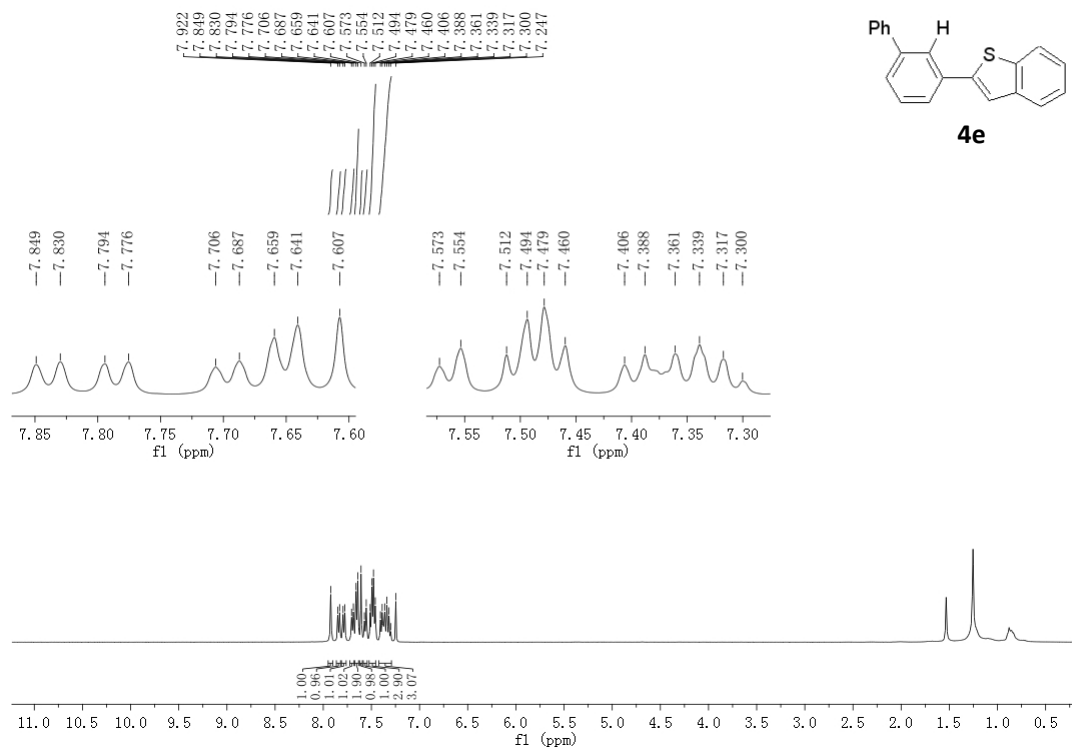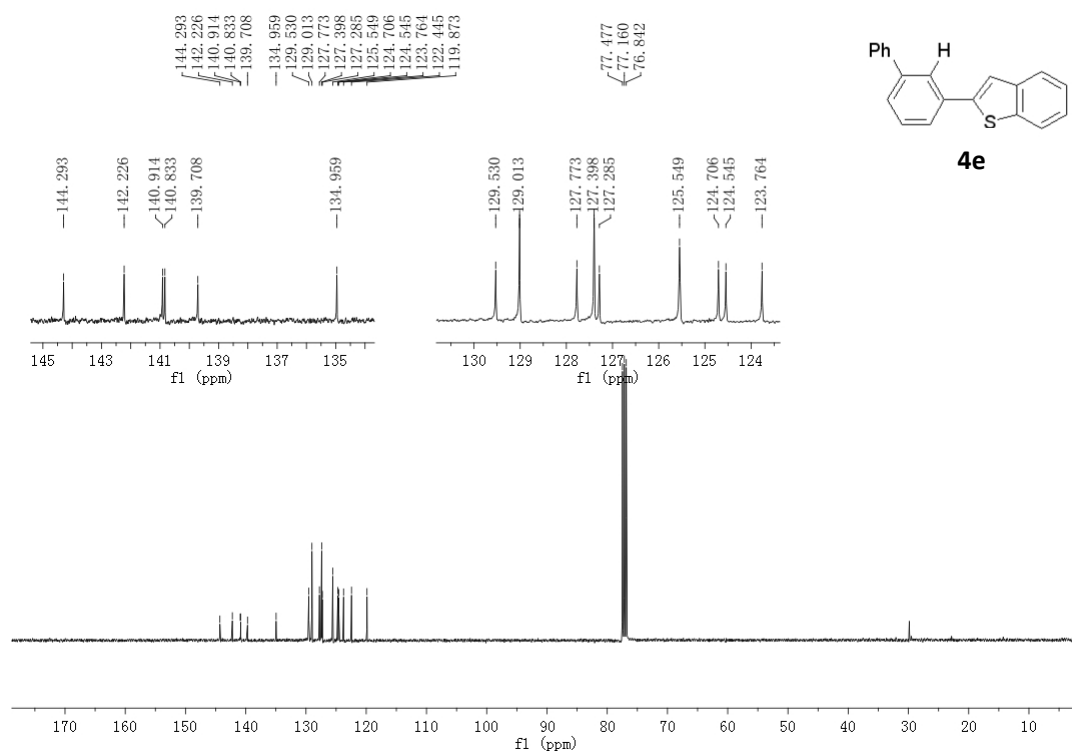

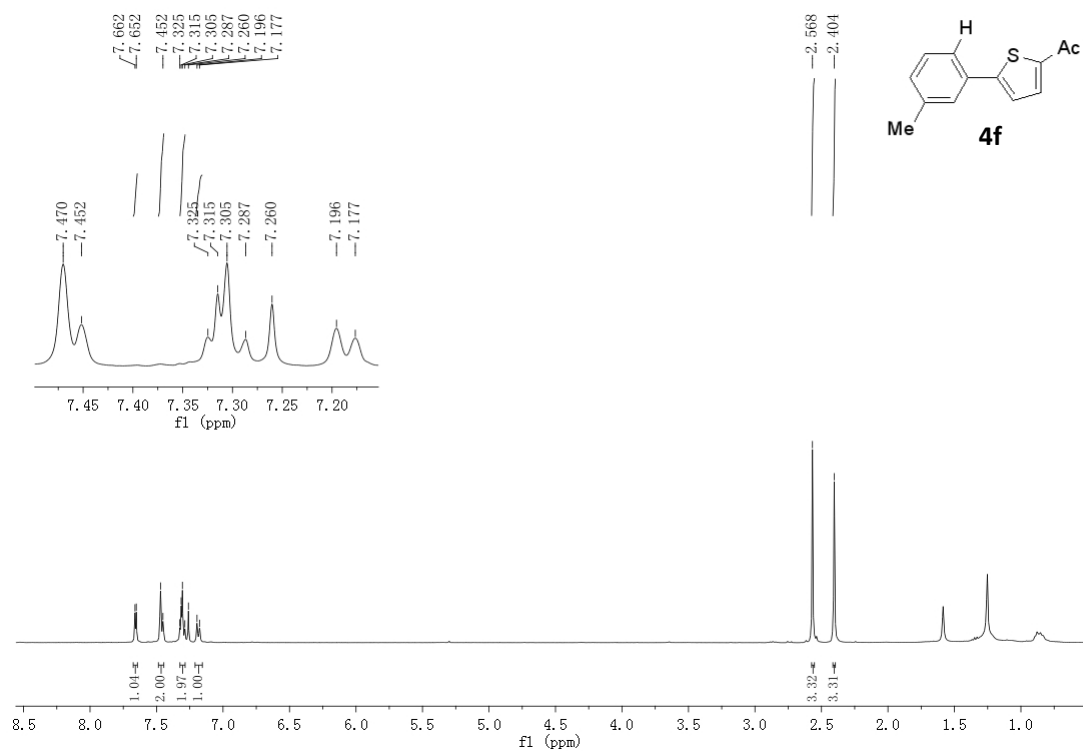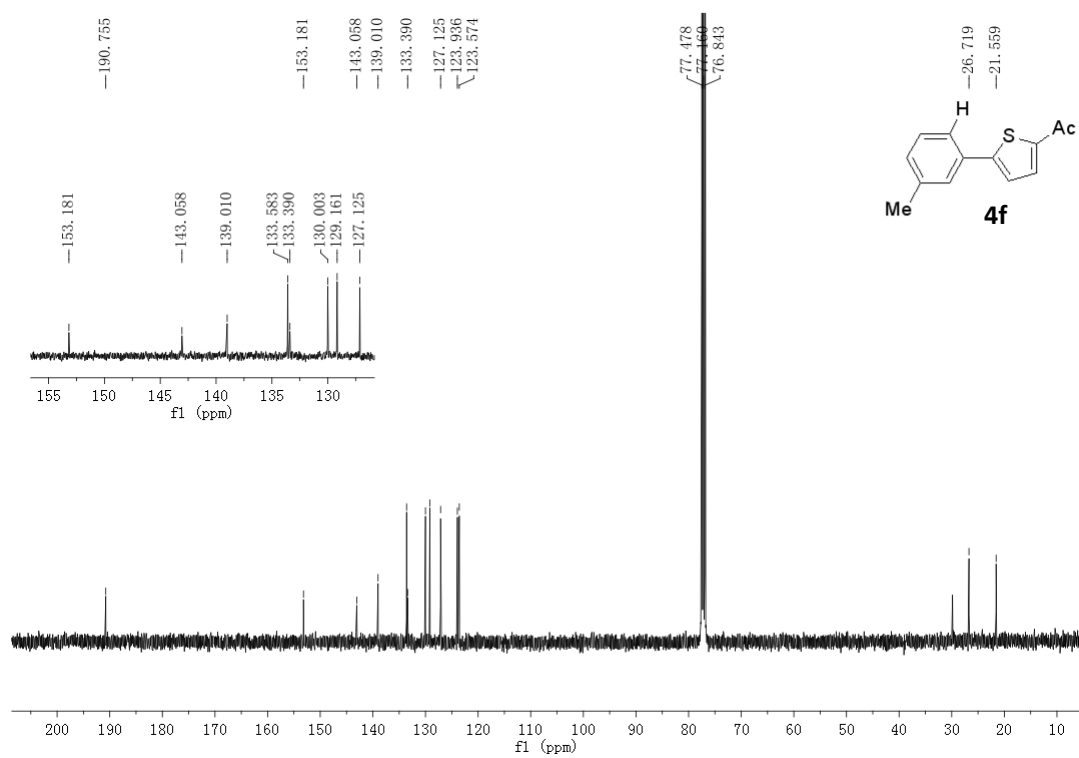

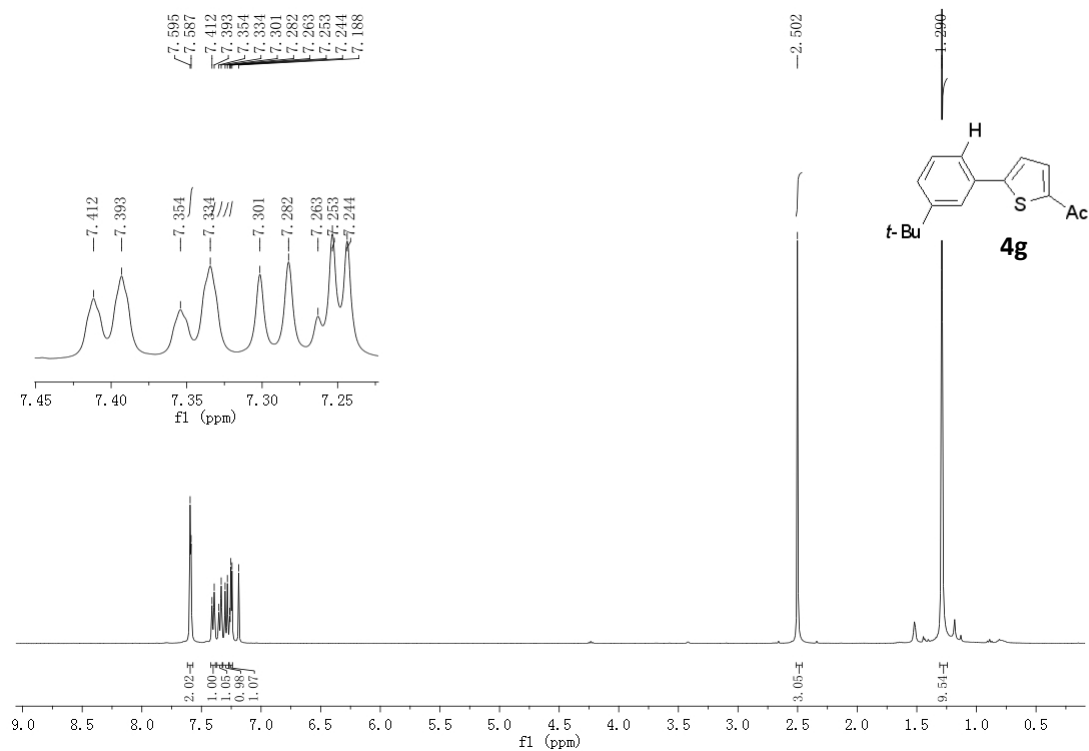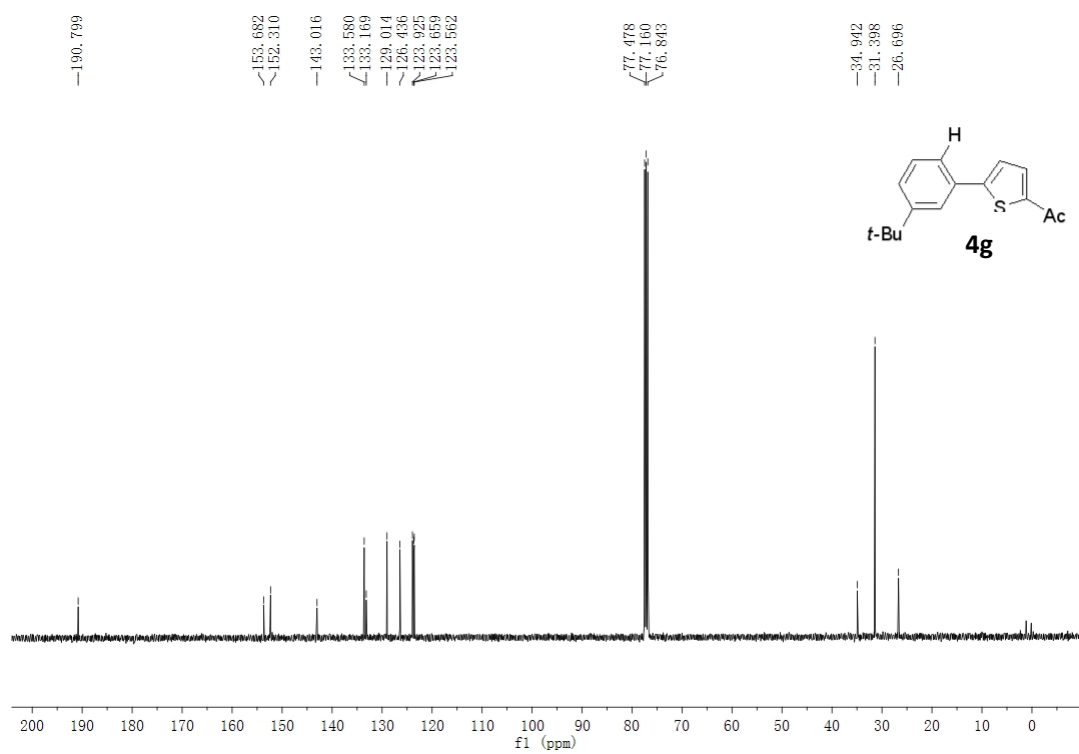

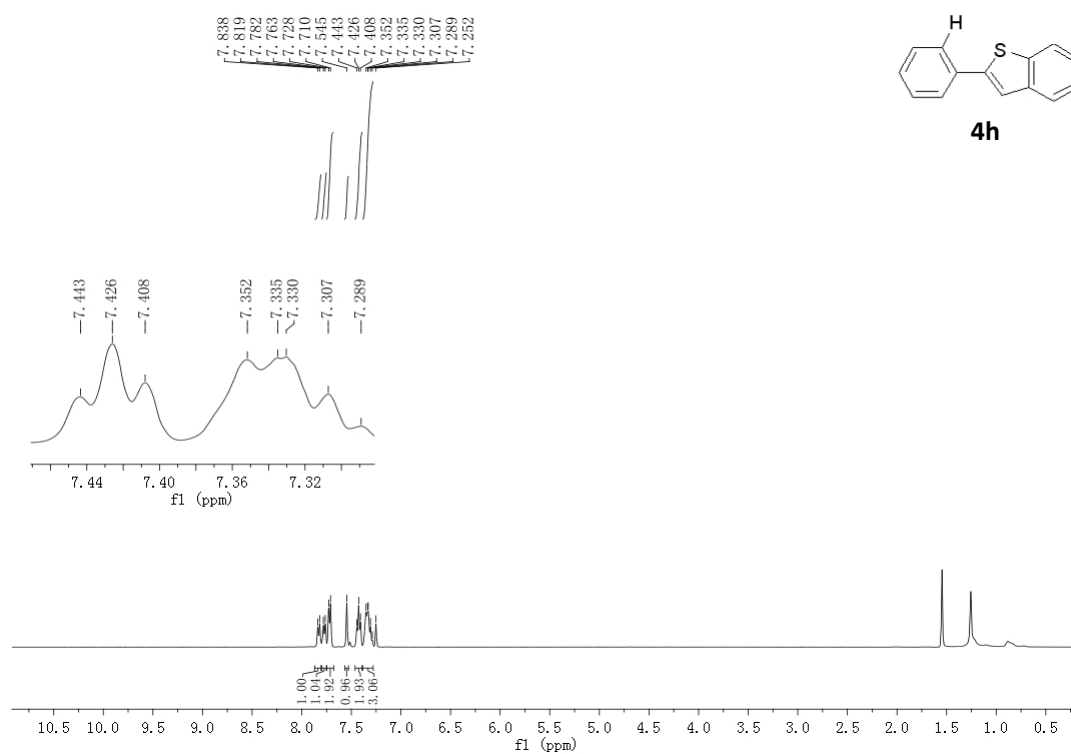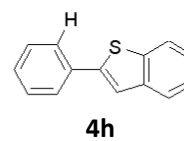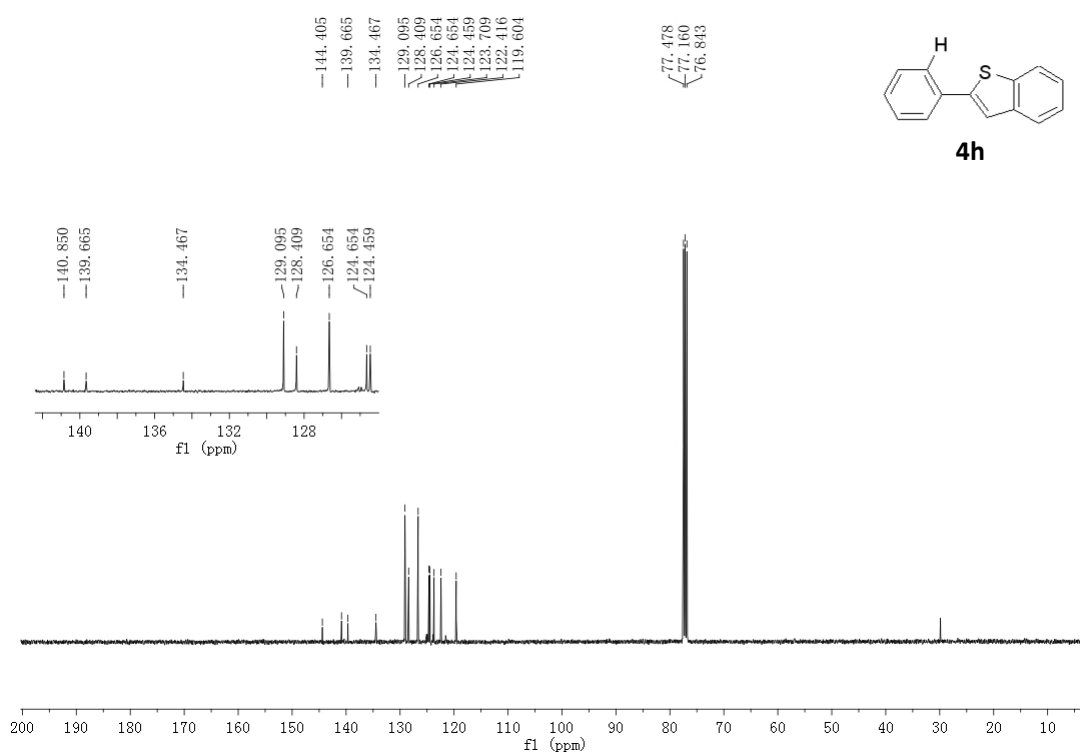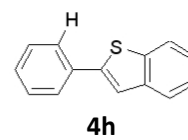

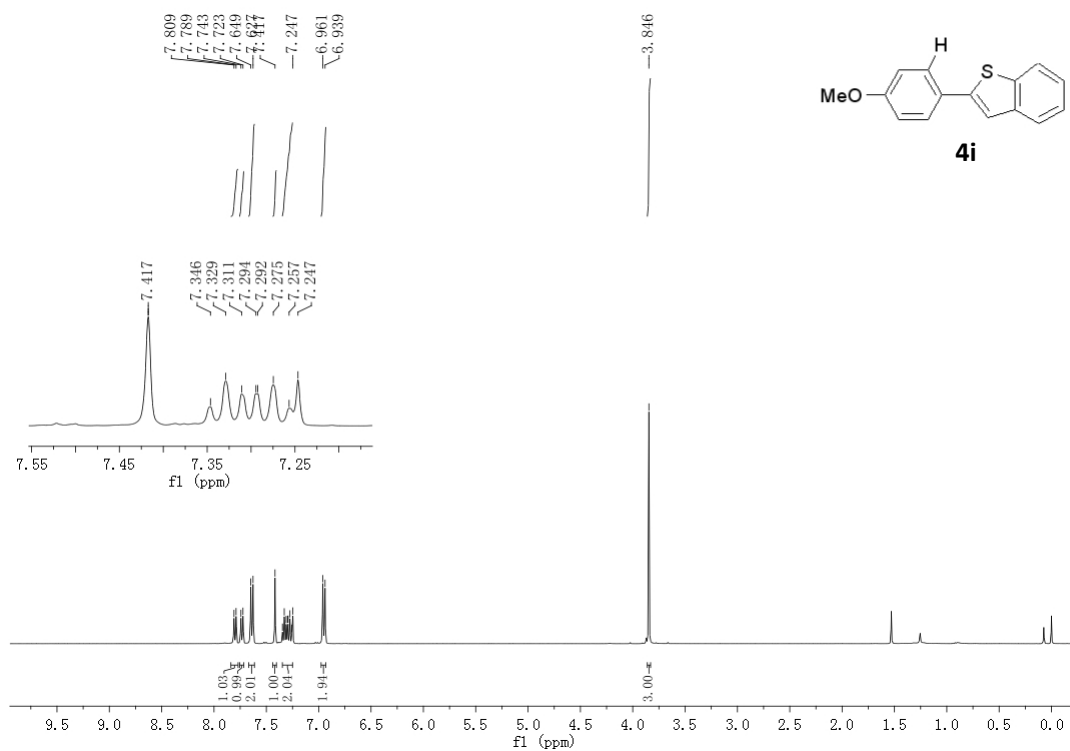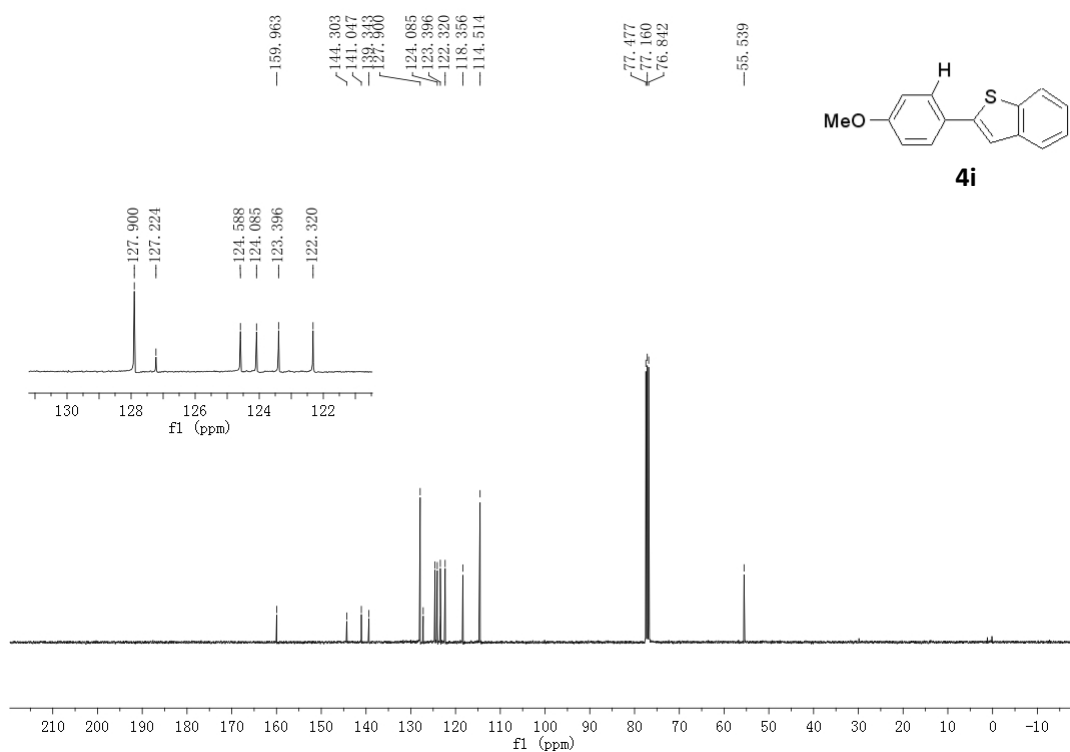

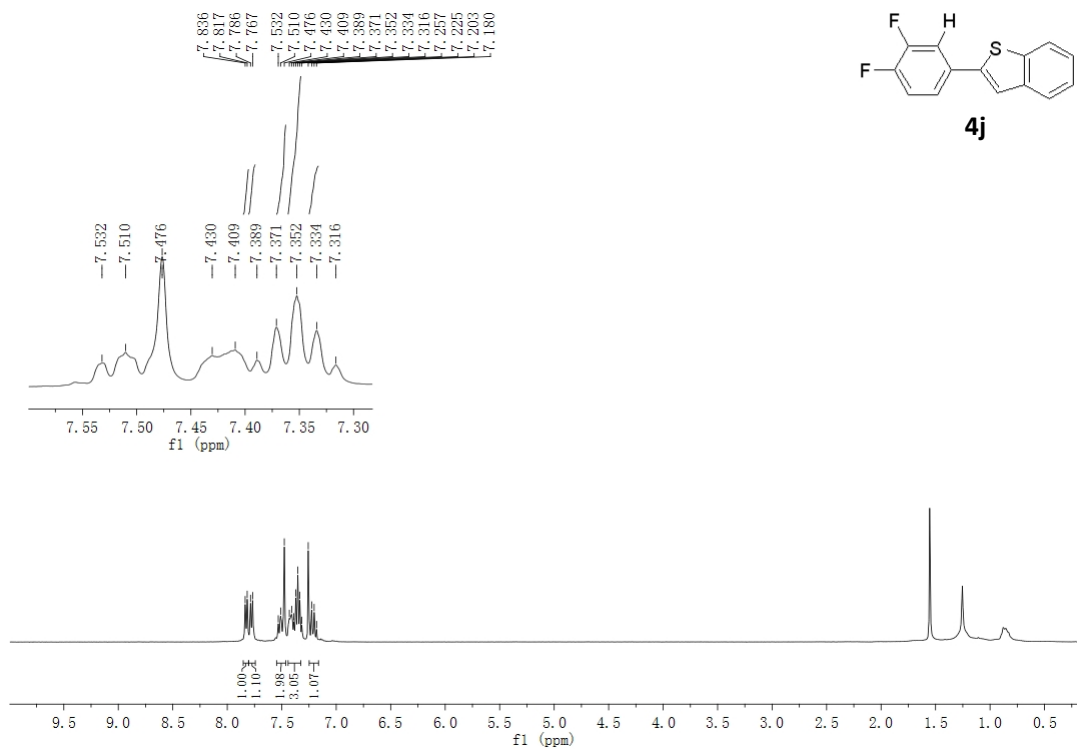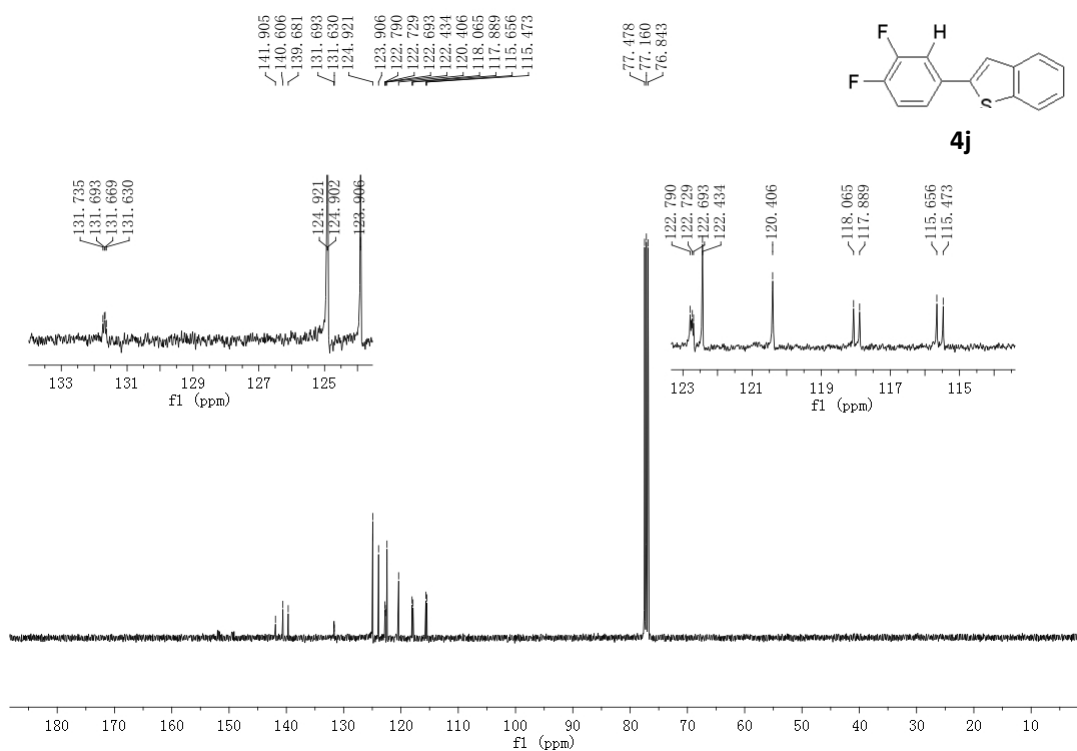



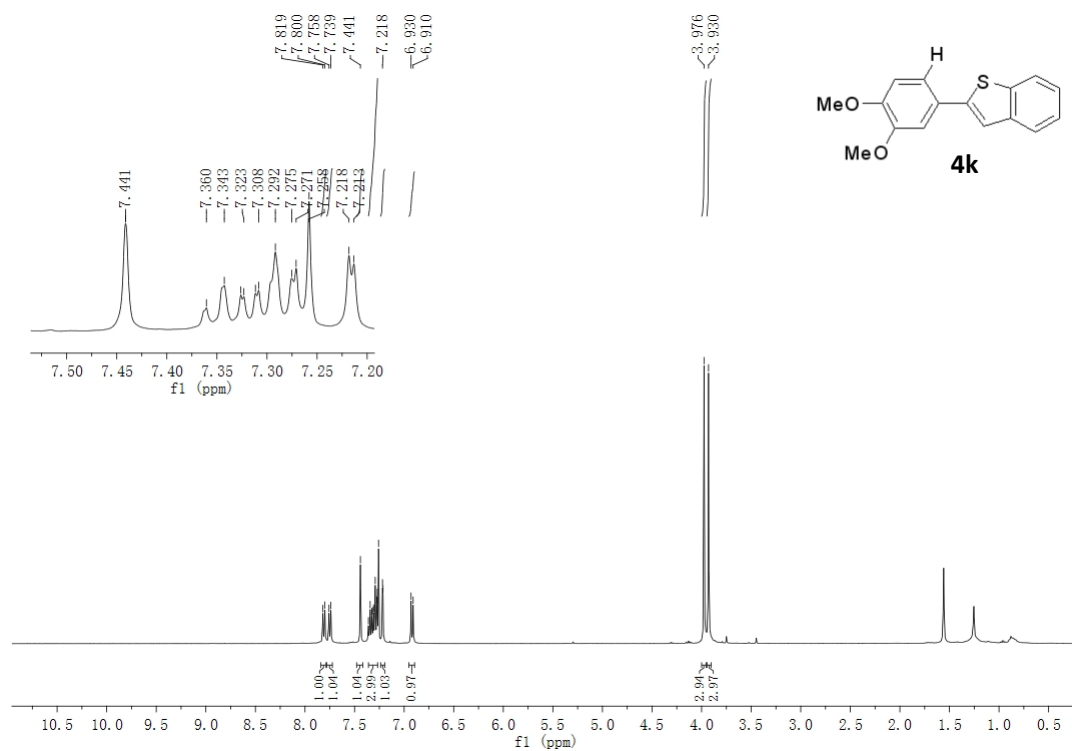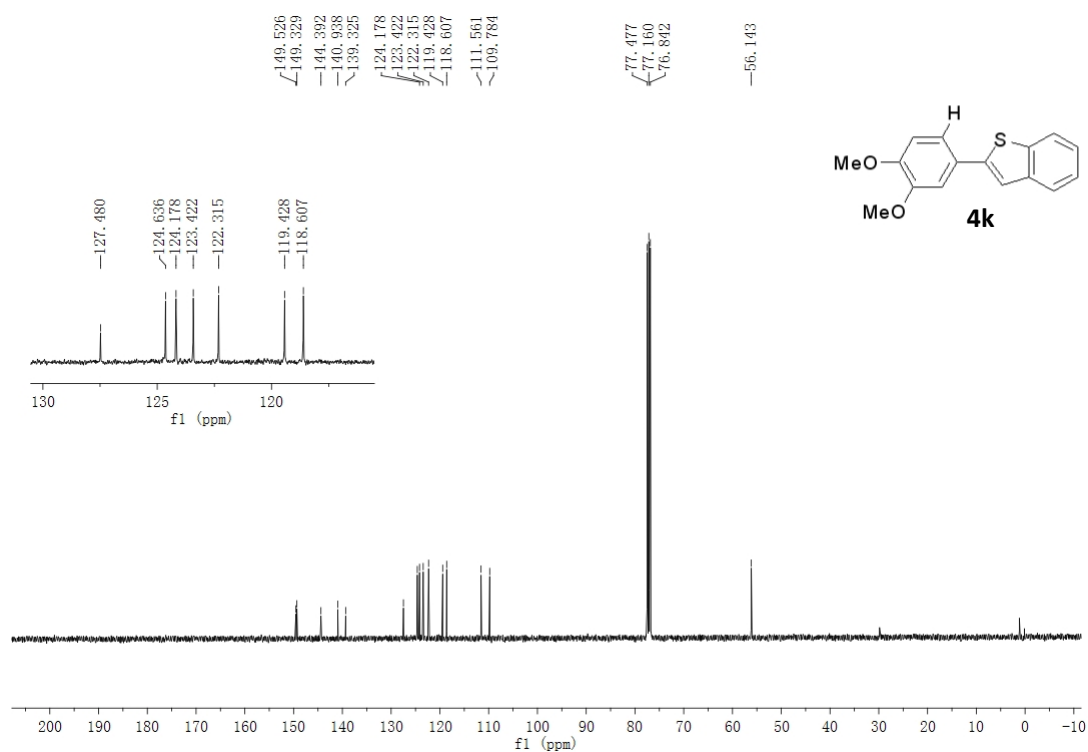

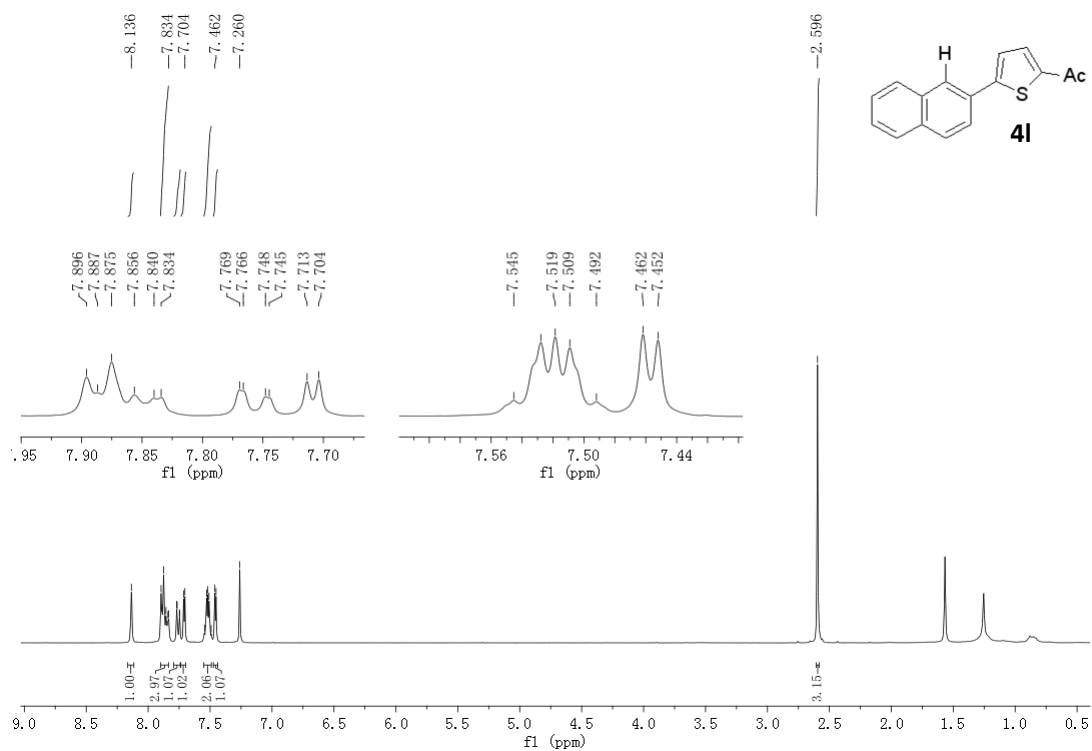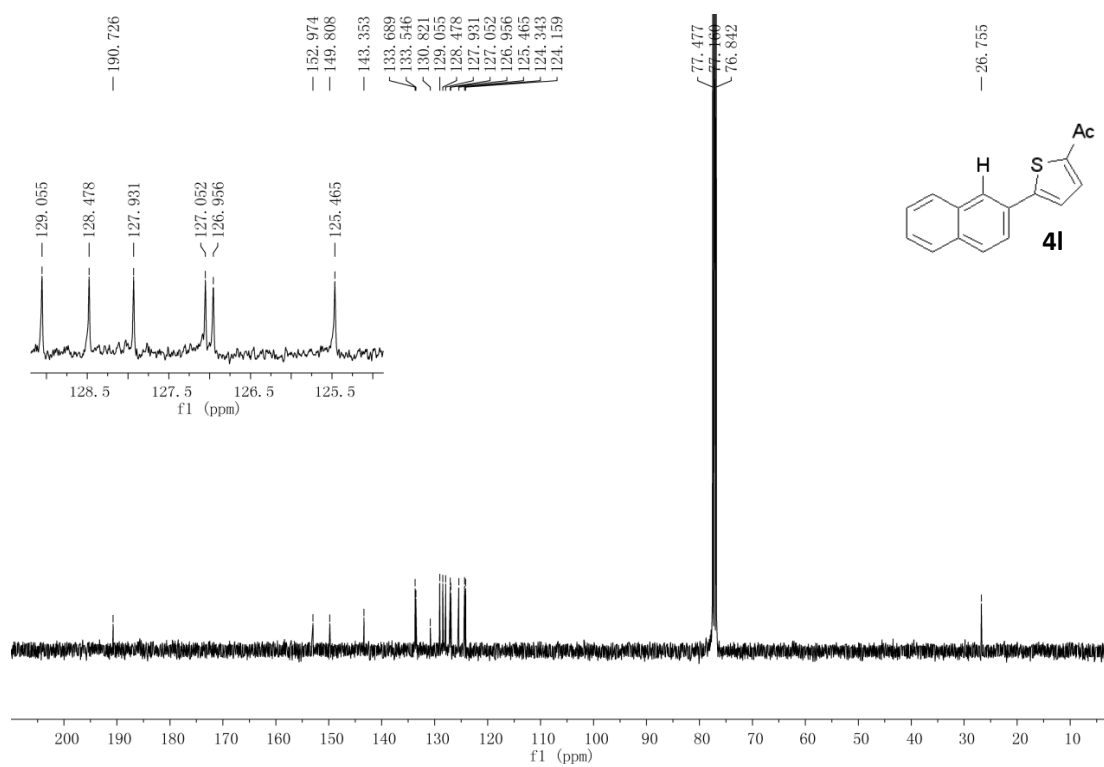

Supplement: Supplementary file 1 [file 3814672]
